# Supplementary material
Source: PubMed Central journal article supplement (PMC3070384)

## SUPPORTING INFORMATION

### Arsenate and phosphate as nucleophiles at the transition states of human purine nucleoside phosphorylase

Rafael G. Silva<sup>‡</sup>, Jennifer S. Hirschi<sup>‡</sup>, Mahmoud Ghanem<sup>¥</sup>, Andrew S. Murkin<sup>£</sup>, and Vern L. Schramm<sup>\*</sup>

*Department of Biochemistry, Albert Einstein College of Medicine, Bronx,*

*New York 10461, USA*

[vern@aecom.yu.edu](mailto:vern@aecom.yu.edu)

### Table of Contents

|                                                                                      |           |
|--------------------------------------------------------------------------------------|-----------|
| <b>1. Comparison between arsenate and phosphate ions .....</b>                       | <b>2</b>  |
| <b>A. Phosphate dianion .....</b>                                                    | <b>2</b>  |
| Phosphate dianion B3LYP/6-31G* .....                                                 | 2         |
| Phosphate dianion B3LYP/6-311++G** (as shown in figure 1) .....                      | 2         |
| <b>B. Arsenate dianion .....</b>                                                     | <b>3</b>  |
| Arsenate dianion B3LYP/6-31G* .....                                                  | 3         |
| Arsenate dianion B3LYP/6-311++G** (as shown in figure 1) .....                       | 3         |
| <b>2. Potential Energy Surfaces for Arsenolysis vs. Phosphorolysis .....</b>         | <b>3</b>  |
| <b>A. Lowest Energy Starting Material .....</b>                                      | <b>3</b>  |
| B3LYP/6-31G* .....                                                                   | 3         |
| B3LYP/6-31+G** .....                                                                 | 4         |
| <b>B. A<sub>N</sub>D<sub>N</sub> mechanism – phosphate grid – B3LYP/6-31G* .....</b> | <b>4</b>  |
| <b>C. A<sub>N</sub>D<sub>N</sub> mechanism – arsenate grid – B3LYP/6-31G* .....</b>  | <b>25</b> |
| <b>D. Grid Energies for Arsenolysis .....</b>                                        | <b>47</b> |
| <b>E. Grid Energies for Phosphorolysis .....</b>                                     | <b>48</b> |
| <b>F. KIEs for Arsenolysis Grid .....</b>                                            | <b>49</b> |
| <b>G. KIEs for Phosphorolysis Grid .....</b>                                         | <b>51</b> |
| <b>3. Transition Structures of Stationary Points .....</b>                           | <b>52</b> |
| Phosphorolysis Transition Structure 1 B3LYP/6-31G* .....                             | 52        |
| Phosphorolysis Transition Structure 2 B3LYP/6-31G* .....                             | 53        |
| Phosphorolysis Transition Structure B3LYP/6-31+G** (shown in figure 3a) .....        | 53        |
| Arsenolysis Transition Structure 1 B3LYP/6-31G* .....                                | 53        |
| Arsenolysis Transition Structure 2 B3LYP/6-31G* .....                                | 54        |
| Arsenolysis Transition Structure B3LYP/6-31+G** (as shown in figure 3b) .....        | 54        |
| <b>4. Enzymatic Transition Structures .....</b>                                      | <b>55</b> |
| Arsenolysis Transition Structure B3LYP/6-31G* (as shown in figure 6a) .....          | 55        |
| Phosphorolysis Transition Structure B3LYP/6-31G* (as shown in figure 6b) .....       | 56        |
| <b>5. Alternative Mechanisms .....</b>                                               | <b>56</b> |
| <b>A. D<sub>N</sub>*A<sub>N</sub><sup>‡</sup> Structures Arsenolysis .....</b>       | <b>56</b> |
| B3LYP/6-31G* $r_{C-O} = 2.7$ .....                                                   | 56        |
| B3LYP/6-31G* $r_{C-O} = 2.5$ .....                                                   | 57        |

|                                                                               |           |
|-------------------------------------------------------------------------------|-----------|
| B3LYP/6-31G* $r_{C-O} = 2.3$ .....                                            | 57        |
| B3LYP/6-31G* $r_{C-O} = 2.1$ .....                                            | 57        |
| B3LYP/6-31G* $r_{C-O} = 1.9$ .....                                            | 58        |
| <b>B. <math>D_N^*A_N^\ddagger</math> Structures Phosphorolysis</b> .....      | <b>58</b> |
| B3LYP/6-31G* $r_{C-O} = 2.7$ .....                                            | 58        |
| B3LYP/6-31G* $r_{C-O} = 2.5$ .....                                            | 58        |
| B3LYP/6-31G* $r_{C-O} = 2.3$ .....                                            | 59        |
| B3LYP/6-31G* $r_{C-O} = 2.1$ .....                                            | 59        |
| B3LYP/6-31G* $r_{C-O} = 1.9$ .....                                            | 59        |
| <b>C. <math>D_N^*A_N^\ddagger</math> Structure KIEs</b> .....                 | <b>60</b> |
| <b>D. <math>D_N^\ddagger^*A_N</math> Structures</b> .....                     | <b>60</b> |
| B3LYP/6-31G* $r_{C-N} = 2.3$ .....                                            | 60        |
| B3LYP/6-31G* $r_{C-N} = 2.5$ .....                                            | 61        |
| B3LYP/6-31G* $r_{C-N} = 2.7$ .....                                            | 61        |
| B3LYP/6-31G* $r_{C-N} = 2.9$ .....                                            | 62        |
| B3LYP/6-31G* $r_{C-N} = 3.1$ .....                                            | 62        |
| <b>E. <math>D_N^\ddagger^*A_N</math> KIEs</b> .....                           | <b>63</b> |
| <b>6. Synthetic schemes for specifically labeled inosine substrates</b> ..... | <b>64</b> |

## 1. Comparison between arsenate and phosphate ions

O,0,-0.5861441149,1.5233286418,2.3073655835

### A. Phosphate dianion

#### Phosphate dianion B3LYP/6-31G\*

phosarsbbb1  
E(RB+HF-LYP) = -642.817443435

|                                              |           |
|----------------------------------------------|-----------|
| Zero-point correction=                       | 0.025266  |
| (Hartree/Particle)                           |           |
| Thermal correction to Energy=                | 0.030190  |
| Thermal correction to Enthalpy=              | 0.031135  |
| Thermal correction to Gibbs Free Energy=     | -0.002939 |
| Sum of electronic and zero-point Energies=   | -         |
| 642.792177                                   |           |
| Sum of electronic and thermal Energies=      | -         |
| 642.787253                                   |           |
| Sum of electronic and thermal Enthalpies=    | -         |
| 642.786309                                   |           |
| Sum of electronic and thermal Free Energies= | -         |
| 642.820383                                   |           |

|       | E (Thermal) | CV             | S              |
|-------|-------------|----------------|----------------|
|       | KCal/Mol    | Cal/Mol-Kelvin | Cal/Mol-Kelvin |
| Total | 18.945      | 16.818         | 71.715         |

O,0,-0.419283131,0.3048102228,-0.0270122134  
P,0,-0.1360998213,0.1694780842,1.7288008189  
O,0,1.4020314318,-0.0547914664,1.6742509457  
O,0,-0.966185659,-1.0496255915,2.1703299385  
H,0,0.5209012944,0.1773851091,-0.2362840732

#### Phosphate dianion B3LYP/6-311++G\*\* (as shown in figure 1)

phosarsbbb2  
E(RB+HF-LYP) = -643.017830487

|                                              |           |
|----------------------------------------------|-----------|
| Zero-point correction=                       | 0.024392  |
| (Hartree/Particle)                           |           |
| Thermal correction to Energy=                | 0.029680  |
| Thermal correction to Enthalpy=              | 0.030624  |
| Thermal correction to Gibbs Free Energy=     | -0.004260 |
| Sum of electronic and zero-point Energies=   | -         |
| 642.993438                                   |           |
| Sum of electronic and thermal Energies=      | -         |
| 642.988151                                   |           |
| Sum of electronic and thermal Enthalpies=    | -         |
| 642.987207                                   |           |
| Sum of electronic and thermal Free Energies= | -         |
| 643.022090                                   |           |

|       | E (Thermal) | CV             | S              |
|-------|-------------|----------------|----------------|
|       | KCal/Mol    | Cal/Mol-Kelvin | Cal/Mol-Kelvin |
| Total | 18.624      | 17.572         | 73.419         |

O,0,-0.4077474878,0.3026686235,-0.0165469669  
P,0,-0.126961091,0.1674173732,1.7426768548  
O,0,1.412109486,-0.0591784929,1.729604312  
O,0,-0.9694638174,-1.0473241358,2.1732812673  
H,0,0.49732181,0.1852382026,-0.3218144208

O,0,-0.5900388998,1.5217634294,2.3102499536

## B. Arsenate dianion

### Arsenate dianion B3LYP/6-31G\*

phosarssbbb3  
E(RB+HF-LYP) = -2535.13703846

Zero-point correction= 0.022518  
(Hartree/Particle)  
Thermal correction to Energy= 0.028051  
Thermal correction to Enthalpy= 0.028996  
Thermal correction to Gibbs Free Energy= -0.006920  
Sum of electronic and zero-point Energies= -  
2535.114520  
Sum of electronic and thermal Energies= -  
2535.108987  
Sum of electronic and thermal Enthalpies= -  
2535.108043  
Sum of electronic and thermal Free Energies= -  
2535.143959

|       | E (Thermal) | CV             | S              |
|-------|-------------|----------------|----------------|
|       | KCal/Mol    | Cal/Mol-Kelvin | Cal/Mol-Kelvin |
| Total | 17.602      | 18.674         | 75.591         |

O,0,-0.4075582828,0.3144145274,-0.1321786661  
As,0,-0.1509879129,0.1679713108,1.7530252564  
O,0,1.5306777501,-0.0712670368,1.6475016146  
O,0,-1.0571125885,-1.1703598341,2.23376889  
H,0,0.5470371705,0.1842475714,-0.2811575514  
O,0,-0.6468351364,1.6455774613,2.3964914565

### Arsenate dianion B3LYP/6-311++G\*\* (as shown in figure 1)

phosarssbbb4  
E(RB+HF-LYP) = -2537.43216078

Zero-point correction= 0.021358  
(Hartree/Particle)  
Thermal correction to Energy= 0.027316  
Thermal correction to Enthalpy= 0.028260  
Thermal correction to Gibbs Free Energy= -0.008476  
Sum of electronic and zero-point Energies= -  
2537.410802  
Sum of electronic and thermal Energies= -  
2537.404845  
Sum of electronic and thermal Enthalpies= -  
2537.403900  
Sum of electronic and thermal Free Energies= -  
2537.440636

|       | E (Thermal) | CV             | S              |
|-------|-------------|----------------|----------------|
|       | KCal/Mol    | Cal/Mol-Kelvin | Cal/Mol-Kelvin |
| Total | 17.141      | 19.797         | 77.318         |

O,0,-0.4057469286,0.3144761151,-0.1359179653  
As,0,-0.1360591394,0.1643990186,1.7772506623  
O,0,1.5546176297,-0.0789249702,1.7238924377  
O,0,-1.0636583191,-1.1750223393,2.2387834682  
H,0,0.5178116626,0.1944058728,-0.3889812374  
O,0,-0.6517439052,1.6512503029,2.4024236345

## 2. Potential Energy Surfaces for Arsenolysis vs. Phosphorolysis

### A. Lowest Energy Starting Material

#### B3LYP/6-31G\*

E(RB+HF-LYP) = -983.394914064

Zero-point correction= 0.240841  
(Hartree/Particle)  
Thermal correction to Energy= 0.256514  
Thermal correction to Enthalpy= 0.257458  
Thermal correction to Gibbs Free Energy= 0.196971  
Sum of electronic and zero-point Energies= -  
983.154073  
Sum of electronic and thermal Energies= -  
983.138400  
Sum of electronic and thermal Enthalpies= -  
983.137456  
Sum of electronic and thermal Free Energies= -  
983.197943

|       | E (Thermal) | CV             | S              |
|-------|-------------|----------------|----------------|
|       | KCal/Mol    | Cal/Mol-Kelvin | Cal/Mol-Kelvin |
| Total | 160.965     | 61.117         | 127.306        |

C,0,3.2302631632,6.8851058247,-1.5007148654  
C,0,2.9776130829,5.3804028374,-1.2565992502  
O,0,1.9816050137,5.3159089707,-0.2614246106  
C,0,2.0204946029,6.5235192222,0.5561980708  
C,0,3.0929128995,7.4277739158,-0.0700075737  
C,0,0.6085967873,7.0989167628,0.582440977  
O,0,0.1441901214,7.4495463577,-0.7124691366  
N,0,2.4722104327,4.6519791294,-2.4263199854  
C,0,1.4531469156,3.7154229039,-2.4457656101  
N,0,1.2783416631,3.1570003187,-3.6206414118  
C,0,2.2333619329,3.7355722475,-4.4208692813  
C,0,2.9886959319,4.6612580376,-3.6997547162  
N,0,4.0255157303,5.4332532376,-4.1496756103  
C,0,4.2955658327,5.2366448596,-5.4115732686  
N,0,3.6269089688,4.3615429165,-6.2070128177  
C,0,2.5255829247,3.5156652554,-5.8199934576  
O,0,2.0135747182,2.7781862603,-6.638813755  
O,0,4.3079852002,7.2349788722,0.6346698595  
O,0,4.5075944137,7.1978541643,-1.9965215952  
H,0,-0.0649721212,6.3756595361,1.0663989021  
H,0,0.5992721242,8.0164797637,1.1796377601  
H,0,2.3349491408,6.2464405455,1.5689238866  
H,0,3.9069418105,4.9016669425,-0.9192684599  
H,0,5.100932006,5.7971317544,-5.8776681623  
H,0,2.7917519406,8.4842986556,-0.0668876099  
H,0,2.4214417763,7.2845583913,-2.127189573  
H,0,4.6007858283,6.7289532663,-2.8558249423  
H,0,5.014714719,7.4092254932,-0.0138554307  
H,0,3.8970873443,4.2660688473,-7.1802677642  
H,0,0.0782416023,6.6191942755,-1.2111661019  
H,0,0.8853314933,3.4999544344,-1.5531444662

**B3LYP/6-31+G\*\***

E(RB3LYP) = -983.471364636

Zero-point correction= 0.239725  
 (Hartree/Particle)  
 Thermal correction to Energy= 0.255668  
 Thermal correction to Enthalpy= 0.256612  
 Thermal correction to Gibbs Free Energy= 0.194992  
 Sum of electronic and zero-point Energies= -  
 983.231640  
 Sum of electronic and thermal Energies= -  
 983.215697  
 Sum of electronic and thermal Enthalpies= -  
 983.214753  
 Sum of electronic and thermal Free Energies= -  
 983.276373

|       | E (Thermal)<br>KCal/Mol | CV<br>Cal/Mol-Kelvin | S<br>Cal/Mol-Kelvin |
|-------|-------------------------|----------------------|---------------------|
| Total | 160.434                 | 61.682               | 129.691             |

C,0,3.236893831,6.8617175092,-1.525734687  
 C,0,2.9387351202,5.3663343702,-1.2815501785  
 O,0,1.8959970758,5.3528356652,-0.3296470634  
 C,0,2.0138708086,6.5198498528,0.5372205958  
 C,0,3.0715254371,7.4342596322,-0.1070136212  
 C,0,0.6231510618,7.1199734525,0.6944756394  
 O,0,0.0823192138,7.5923932728,-0.5336745371  
 N,0,2.4589150643,4.6353211138,-2.4603128972  
 C,0,1.456805059,3.6792002987,-2.4859326566  
 N,0,1.3074679912,3.1131498088,-3.6617640533  
 C,0,2.2617981096,3.7027591546,-4.454265167  
 C,0,2.9923760821,4.6459395825,-3.7278888358  
 N,0,4.0237414353,5.4281732361,-4.1720833693  
 C,0,4.3146520488,5.2285630421,-5.430046904  
 N,0,3.6678542273,4.3385380982,-6.228865067  
 C,0,2.5774182858,3.4821347676,-5.8474157906  
 O,0,2.0846062257,2.7291430348,-6.6691489077  
 O,0,4.278543925,7.308797359,0.632940327  
 O,0,4.5297931943,7.1472944052,-2.0033704941  
 H,0,-0.0399716474,6.3768111335,1.1581553205  
 H,0,0.6812904054,7.9844534743,1.3631310412  
 H,0,2.3859366959,6.1931800455,1.5156775859  
 H,0,3.835786722,4.8610744988,-0.8963950094  
 H,0,5.1184924776,5.7967667768,-5.8883983251  
 H,0,2.7424403184,8.4798552431,-0.138899217  
 H,0,2.4559603093,7.2744037461,-2.178440299  
 H,0,4.6236309005,6.7002648822,-2.871201234  
 H,0,5.0079436743,7.5090352349,0.0243192272  
 H,0,3.9521625874,4.2422138935,-7.1976660974  
 H,0,-0.1074946875,6.8245974817,-1.0898123742  
 H,0,0.8779970473,3.4611289333,-1.6015529511

**B. A<sub>N</sub>D<sub>N</sub> mechanism – phosphate grid  
 – B3LYP/6-31G\***

**LG 1.9 Nuc 1.9**

grid1lg19.1

E(RB+HF-LYP) = -1626.30450556

Zero-point correction= 0.265220  
 (Hartree/Particle)  
 Thermal correction to Energy= 0.285782  
 Thermal correction to Enthalpy= 0.286726  
 Thermal correction to Gibbs Free Energy= 0.215530

Sum of electronic and zero-point Energies= -  
 1626.039285  
 Sum of electronic and thermal Energies= -  
 1626.018724  
 Sum of electronic and thermal Enthalpies= -  
 1626.017779  
 Sum of electronic and thermal Free Energies= -  
 1626.088976

|       | E (Thermal)<br>KCal/Mol | CV<br>Cal/Mol-Kelvin | S<br>Cal/Mol-Kelvin |
|-------|-------------------------|----------------------|---------------------|
| Total | 179.331                 | 79.497               | 149.845             |

C,0,0.8670627822,1.4989604038,-0.2946585882  
 C,0,0.5015384403,0.3509703833,-1.2720409554  
 O,0,1.3696469843,-0.7034621642,-1.1361542767  
 C,0,2.643330721,-0.2052457921,-0.650923624  
 C,0,2.3627893211,1.1150624161,0.1069562032  
 C,0,3.2395064472,-1.3243747223,0.186628198  
 O,0,2.4012697022,-1.7190747376,1.2703889204  
 N,0,-0.8460277872,-0.5273953846,-0.608834974  
 C,0,-0.9717874284,-1.8885125284,-0.2618644165  
 N,0,-2.1203464303,-2.3911512637,0.1954286996  
 C,0,-2.826381876,-1.2620451757,0.5200254633  
 C,0,-2.0454121193,-0.112631877,0.2343517272  
 N,0,-2.4308876151,1.1915565669,0.4340967915  
 C,0,-3.6218027688,1.3121349079,0.922567497  
 N,0,-4.4533057764,0.257508171,1.2298353702  
 C,0,-4.1481855371,-1.1268501587,1.06558805  
 O,0,-4.9952693497,-1.9647365859,1.387952792  
 O,0,3.3592685259,2.0794798544,-0.0875526927  
 O,0,0.60225634,2.802881393,-0.6811189881  
 H,0,3.4576685082,-2.1919040728,-0.4621932397  
 H,0,4.1879602144,-0.9779999413,0.615349179  
 H,0,3.2756519231,0.0185974364,-1.5150273951  
 H,0,-4.0310650778,2.3024921489,1.119819517  
 H,0,2.3523170542,0.9061137458,1.1850181883  
 H,0,0.2635940411,1.3517217909,0.6043343158  
 H,0,1.0409709765,3.049546916,-1.544642841  
 H,0,3.5825812139,2.1236866617,-1.0690848714  
 H,0,-5.3756659975,0.4339713686,1.6084608373  
 H,0,1.495780291,-1.6631433731,0.9161962609  
 H,0,-0.1676057502,-2.5084271919,-0.6380258627  
 O,0,1.4558498909,1.0282423278,-2.7689010395  
 P,0,2.4020453456,2.1806264113,-3.2548553317  
 O,0,2.5721917194,1.9284935801,-4.9168924148  
 O,0,1.7668421539,3.5518614,-3.0490124792  
 O,0,3.8462756419,1.9922314388,-2.7305504372  
 H,0,-0.2309385193,0.3626261232,-2.0520636238  
 H,0,3.4805282644,1.5928571434,-4.9669337989

**LG 1.9 Nuc 2.1**

grid1lg19.2

E(RB+HF-LYP) = -1626.31390345

Zero-point correction= 0.264562  
 (Hartree/Particle)  
 Thermal correction to Energy= 0.286088  
 Thermal correction to Enthalpy= 0.287032  
 Thermal correction to Gibbs Free Energy= 0.212065  
 Sum of electronic and zero-point Energies= -  
 1626.049341  
 Sum of electronic and thermal Energies= -  
 1626.027816  
 Sum of electronic and thermal Enthalpies= -  
 1626.026872  
 Sum of electronic and thermal Free Energies= -  
 1626.101838

|       | E (Thermal)<br>KCal/Mol | CV<br>Cal/Mol-Kelvin | S<br>Cal/Mol-Kelvin |
|-------|-------------------------|----------------------|---------------------|
| Total | 179.523                 | 81.571               | 157.781             |

C,0,0.8637162099,1.4814818271,-0.2917754619  
C,0,0.4645040926,0.306819683,-1.2171479885  
O,0,1.3466431879,-0.7226530941,-1.1228975759  
C,0,2.6368049278,-0.2151414299,-0.6740124799  
C,0,2.3645233129,1.0970819254,0.0970748523  
C,0,3.277434896,-1.3316222321,0.131021329  
O,0,2.487117725,-1.751553701,1.2428457121  
N,0,-0.9211854581,-0.5541157214,-0.2431604685  
C,0,-1.0154720577,-1.9135389306,-0.1666592266  
N,0,-2.1487173571,-2.4025613053,0.3368076152  
C,0,-2.8703438509,-1.12659889032,0.6036133513  
C,0,-2.1182278685,-0.1225507265,0.2391341156  
N,0,-2.5216764291,1.1840355555,0.3604799103  
C,0,-3.70830436,1.3134302227,0.8578574389  
N,0,-4.5151482917,0.2656201046,1.242291051  
C,0,-4.187537917,-1.1211322771,1.1594901282  
O,0,-5.0132179929,-1.9524739178,1.5441895307  
O,0,3.3561727334,2.0609113918,-0.0961542949  
O,0,0.5912570075,2.7687653362,-0.7160349892  
H,0,3.4871089358,-2.1903984535,-0.531342898  
H,0,4.2337829048,-0.9707058242,0.528115989  
H,0,3.2247662499,0.0222206394,-1.5647102936  
H,0,-4.1329768658,2.3067407715,0.9980672098  
H,0,2.3591797335,0.8754796979,1.1734748404  
H,0,0.2735873085,-1.3590329195,0.6227030053  
H,0,1.0557393679,3.012775279,-1.5740489619  
H,0,3.5849611519,2.1125733523,-1.0819109114  
H,0,-5.4349977838,0.4496050034,1.6235811228  
H,0,1.5687875301,-1.711865711,0.9233413829  
H,0,-0.2027915749,-2.5373908609,-0.5168402771  
O,0,1.5188017418,1.0120491338,-2.8907980717  
P,0,2.4556284993,2.1889155289,-3.2837906496  
O,0,2.7217319622,2.0513429888,-4.9526867746  
O,0,1.802384514,3.5472304532,-3.0206082875  
O,0,3.8885642855,2.0058005203,-2.7111999555  
H,0,-0.1762882421,0.37741110868,-2.0736461249  
H,0,3.6659322413,1.8300372877,-4.9649967335

### LG 1.9 Nuc 2.3

grid1lg19.3

E(RB+HF-LYP) = -1626.32006768

|                                              |          |
|----------------------------------------------|----------|
| Zero-point correction=                       | 0.263920 |
| (Hartree/Particle)                           |          |
| Thermal correction to Energy=                | 0.285486 |
| Thermal correction to Enthalpy=              | 0.286430 |
| Thermal correction to Gibbs Free Energy=     | 0.211389 |
| Sum of electronic and zero-point Energies=   | -        |
| 1626.056148                                  |          |
| Sum of electronic and thermal Energies=      | -        |
| 1626.034582                                  |          |
| Sum of electronic and thermal Enthalpies=    | -        |
| 1626.033638                                  |          |
| Sum of electronic and thermal Free Energies= | -        |
| 1626.108679                                  |          |

|       | E (Thermal)<br>KCal/Mol | CV<br>Cal/Mol-Kelvin | S<br>Cal/Mol-Kelvin |
|-------|-------------------------|----------------------|---------------------|
| Total | 179.145                 | 81.622               | 157.937             |

C,0,0.8528955582,1.4731586546,-0.2894099391  
C,0,0.4370990895,0.2789893618,-1.1799340209  
O,0,1.3325057897,-0.7317416621,-1.1107075678  
C,0,2.6302544947,-0.2131322512,-0.6831221592  
C,0,2.3562164865,1.0929731424,0.0959927074

C,0,3.2996947902,-1.3249496121,0.1028124609  
O,0,2.5361545289,-1.7623342376,1.2274958175  
N,0,-0.975287713,-0.5732951737,-0.2371870263  
C,0,-1.0534195831,-1.9301719354,-0.1233573373  
N,0,-2.1763715182,-2.4090159856,0.4089085673  
C,0,-2.9029043325,-1.2705725718,0.6527897557  
C,0,-2.1668991112,-0.1310322811,0.2469885647  
N,0,-2.5761090409,1.1753783625,0.3351529997  
C,0,-3.7568743234,1.3104169578,0.8452900638  
N,0,-4.5501178029,0.2685615852,1.270676228  
C,0,-4.2136415152,-1.1178343352,1.223144745  
O,0,-5.0265410561,-1.9439563681,1.6424313327  
O,0,3.3392126529,2.0618720516,-0.0983986998  
O,0,0.5818446688,2.7443608545,-0.7560062269  
H,0,3.5091314912,-2.1772727203,-0.5672998669  
H,0,4.257450829,-0.9515371549,0.483982629  
H,0,3.1896424582,0.0343411768,-1.589629565  
H,0,-4.1866012325,2.3043379097,0.9626161465  
H,0,2.3538972989,0.8644848842,1.1713210679  
H,0,0.2668783788,1.3755170878,0.6318413867  
H,0,1.0700356917,2.9809362417,-1.6120765439  
H,0,3.5726425825,2.1120378601,-1.0874359272  
H,0,-5.4657181354,0.4572221197,1.6599173712  
H,0,1.612490504,-1.7412979292,0.9230360466  
H,0,-0.2386255066,-2.5554429264,-0.4657368136  
O,0,1.5745953485,0.9514082035,-3.0624724309  
P,0,2.4962278913,2.1637016219,-3.3266087206  
O,0,2.8717431726,2.164256038,-4.9829210391  
O,0,1.8066972082,3.4963959782,-3.005725122  
O,0,3.9057153566,1.9874790831,-2.6861642059  
H,0,-0.1299662742,0.3916202143,-2.0872256519  
H,0,3.8282953447,2.0088053754,-4.9433128662

### LG 1.9 Nuc 2.5

grid1lg19.4

E(RB+HF-LYP) = -1626.32352444

|                                              |          |
|----------------------------------------------|----------|
| Zero-point correction=                       | 0.263280 |
| (Hartree/Particle)                           |          |
| Thermal correction to Energy=                | 0.284926 |
| Thermal correction to Enthalpy=              | 0.285871 |
| Thermal correction to Gibbs Free Energy=     | 0.210173 |
| Sum of electronic and zero-point Energies=   | -        |
| 1626.060245                                  |          |
| Sum of electronic and thermal Energies=      | -        |
| 1626.038598                                  |          |
| Sum of electronic and thermal Enthalpies=    | -        |
| 1626.037654                                  |          |
| Sum of electronic and thermal Free Energies= | -        |
| 1626.113351                                  |          |

|       | E (Thermal)<br>KCal/Mol | CV<br>Cal/Mol-Kelvin | S<br>Cal/Mol-Kelvin |
|-------|-------------------------|----------------------|---------------------|
| Total | 178.794                 | 81.614               | 159.319             |

C,0,0.8429103849,1.475354951,-0.2792448503  
C,0,0.4260393119,0.2653561526,-1.1466611168  
O,0,1.330251718,-0.7355641927,-1.0763464066  
C,0,2.6316773002,-0.2012948633,-0.6674736628  
C,0,2.3516893745,1.1087011279,0.1024588359  
C,0,3.3187282419,-1.301165506,0.1190731512  
O,0,2.5616841455,-1.7438580676,1.246740436  
N,0,-1.0171946272,-0.5841939944,-0.2492549803  
C,0,-1.1024564858,-1.9416929836,-0.1578054422  
N,0,-2.2238933567,-2.4167999531,0.3787870741  
C,0,-2.9369725704,-1.275644971,0.6502162581  
C,0,-2.197228518,-0.1351404212,0.2557485635  
N,0,-2.5913620156,1.1727826631,0.3724533982  
C,0,-3.7643033528,1.3092402799,0.9005546331

N,0,-4.5617121947,0.2673882381,1.3167784402  
 C,0,-4.2392241466,-1.1211884089,1.2399862865  
 O,0,-5.0535338759,-1.9473647167,1.6548566287  
 O,0,3.3208733889,2.0841260676,-0.1120951698  
 O,0,0.5700591157,2.72715609,-0.7887777479  
 H,0,3.5372963675,-2.1529937255,-0.5482653577  
 H,0,4.2719313153,-0.9135974293,0.4969107442  
 H,0,3.1750421791,0.0424337378,-1.585276068  
 H,0,-4.1824483038,2.3048635463,1.0417821006  
 H,0,2.3556204629,0.8877467461,1.17967939  
 H,0,0.2605291797,1.3967867498,0.6471827119  
 H,0,1.0722582017,2.9432878556,-1.6538807512  
 H,0,3.5443508899,2.1200812851,-1.1092730263  
 H,0,-5.4704008421,0.4576112021,1.7212277779  
 H,0,1.6391793948,-1.7430471155,0.9377178135  
 O,0,-0.2948115532,-2.5657654955,-0.5182522236  
 O,0,1.6196948416,0.8487663207,-3.264399435  
 P,0,2.5126778539,2.0944306876,-3.3916878907  
 O,0,2.9972523127,2.2216211098,-5.0168052066  
 O,0,1.7782534815,3.3974291867,-3.0283844121  
 O,0,3.8920735962,1.9360985969,-2.6762133018  
 H,0,-0.0724454312,0.4016357271,-2.0950847945  
 H,0,3.960158686,2.1810811422,-4.9073062395

### LG 1.9 Nuc 2.7

grid1lg19.5

E(RB+HF-LYP) = -1626.32505364

|                                              |          |
|----------------------------------------------|----------|
| Zero-point correction=                       | 0.262866 |
| (Hartree/Particle)                           |          |
| Thermal correction to Energy=                | 0.284570 |
| Thermal correction to Enthalpy=              | 0.285514 |
| Thermal correction to Gibbs Free Energy=     | 0.209966 |
| Sum of electronic and zero-point Energies=   | -        |
| 1626.062187                                  |          |
| Sum of electronic and thermal Energies=      | -        |
| 1626.040484                                  |          |
| Sum of electronic and thermal Enthalpies=    | -        |
| 1626.039539                                  |          |
| Sum of electronic and thermal Free Energies= | -        |
| 1626.115088                                  |          |

|       | E (Thermal)<br>KCal/Mol | CV<br>Cal/Mol-Kelvin | S<br>Cal/Mol-Kelvin |
|-------|-------------------------|----------------------|---------------------|
| Total | 178.570                 | 81.570               | 159.005             |

C,0,0.832343946,1.4784826793,-0.2710433288  
 C,0,0.419451287,0.2588390556,-1.1248570179  
 O,0,1.3305900239,-0.7342010332,-1.0581034698  
 C,0,2.6321247675,-0.1910354184,-0.6524298527  
 C,0,2.3453289183,1.1226285757,0.1095558716  
 C,0,3.324780577,-1.283507953,0.1388510236  
 O,0,2.567219162,-1.7264261262,1.2662030104  
 N,0,-1.0431232032,-0.5918232555,-0.2604231236  
 C,0,-1.13826867,-1.9498115032,-0.1923190562  
 N,0,-2.259304851,-2.4216048121,0.3464364186  
 C,0,-2.9586550908,-1.2781973548,0.6444084656  
 C,0,-2.2128900746,-0.1376725551,0.2634702856  
 N,0,-2.5914796158,1.1715291634,0.4082409161  
 C,0,-3.7576262108,1.3097546858,0.9510426749  
 N,0,-4.5610809646,0.2684543664,1.3559509913  
 C,0,-4.2533057327,-1.1216888719,1.2507562104  
 O,0,-5.0709415085,-1.9474284157,1.6587741727  
 O,0,3.3029851853,2.1031979792,-0.1218288789  
 O,0,0.561720425,2.7155039364,-0.812963118  
 H,0,3.550687334,-2.1361639406,-0.5245825856  
 H,0,4.2740936376,-0.8877108381,0.5176579794  
 H,0,3.1716994851,0.0494846742,-1.5742011023

H,0,-4.1638227248,2.3067469907,1.1150525047  
 H,0,2.3542628531,0.909734375,1.1885380868  
 H,0,0.2503345042,1.4150092408,0.6570719703  
 H,0,1.0647745541,2.9054110694,-1.6936251162  
 H,0,3.5178171021,2.1260658018,-1.1254810814  
 H,0,-5.4635570575,0.4602527202,1.7734011374  
 H,0,1.6468003634,-1.7395282612,0.9512954659  
 H,0,-0.3381604836,-2.5736770475,-0.5693257303  
 O,0,1.6833591763,0.7472217188,-3.4602399245  
 P,0,2.5255444347,2.0273797195,-3.4545694385  
 O,0,3.1054032079,2.2773900185,-5.0349063818  
 O,0,1.7286120164,3.2894985722,-3.0632929716  
 O,0,3.8692499982,1.8960822551,-2.6635433121  
 H,0,-0.0407800609,0.4037744609,-2.0954538359  
 H,0,4.0560577596,2.3427029478,-4.853851699

### LG 1.9 Nuc 2.9

grid1lg19.6

E(RB+HF-LYP) = -1626.32534512

|                                              |          |
|----------------------------------------------|----------|
| Zero-point correction=                       | 0.262557 |
| (Hartree/Particle)                           |          |
| Thermal correction to Energy=                | 0.284336 |
| Thermal correction to Enthalpy=              | 0.285280 |
| Thermal correction to Gibbs Free Energy=     | 0.209037 |
| Sum of electronic and zero-point Energies=   | -        |
| 1626.062788                                  |          |
| Sum of electronic and thermal Energies=      | -        |
| 1626.041009                                  |          |
| Sum of electronic and thermal Enthalpies=    | -        |
| 1626.040065                                  |          |
| Sum of electronic and thermal Free Energies= | -        |
| 1626.116308                                  |          |

|       | E (Thermal)<br>KCal/Mol | CV<br>Cal/Mol-Kelvin | S<br>Cal/Mol-Kelvin |
|-------|-------------------------|----------------------|---------------------|
| Total | 178.424                 | 81.508               | 160.468             |

C,0,0.8289681007,1.4901803121,-0.2698022495  
 C,0,0.4102294413,0.2697845704,-1.1180174013  
 O,0,1.3272061303,-0.7147986831,-1.0834834555  
 C,0,2.6268243863,-0.1869636784,-0.6460257254  
 C,0,2.3419314683,1.1318125692,0.1092501822  
 C,0,3.2928113686,-1.2867232235,0.1568206185  
 O,0,2.5220377554,-1.7106611018,1.2825653085  
 N,0,-1.0499404365,-0.5903258589,-0.2588846611  
 C,0,-1.1376003241,-1.9487950104,-0.1912700504  
 N,0,-2.2522014972,-2.4245724842,0.3565065636  
 C,0,-2.9537411415,-1.2841156396,0.6610132959  
 C,0,-2.216463805,-0.1401342103,0.2754076758  
 N,0,-2.5989881893,1.1674112353,0.422851849  
 C,0,-3.7621119216,1.3003944465,0.9736729206  
 N,0,-4.5579791134,0.2556140735,1.3839350714  
 C,0,-4.2450297622,-1.1332881042,1.2765049965  
 O,0,-5.055780857,-1.9626844952,1.6897891904  
 O,0,3.2972718431,2.1093721447,-0.137198586  
 O,0,0.5702643243,2.7189124686,-0.8326986176  
 H,0,3.5093858546,-2.1465591219,-0.5002223346  
 H,0,4.2458584225,-0.9051981103,0.5406976248  
 H,0,3.1879498595,0.0484100666,-1.5575835359  
 H,0,-4.1715600594,2.2955675476,1.1402388244  
 H,0,2.3540150011,0.9272365602,1.1898167063  
 H,0,0.2459914081,1.4403145868,0.6588116106  
 H,0,1.0747593763,2.8831214395,-1.5753350324  
 H,0,3.5017408438,2.118145836,-1.1464987188  
 H,0,-5.458714031,0.4435187801,1.8069185521  
 H,0,1.6048470253,-1.7341277897,0.9597982594  
 H,0,-0.3384270168,-2.5686407216,-0.5769665822

O,0,1.7281709535,0.7031611828,-3.6646241207  
 P,0,2.5412860433,1.9881450721,-3.5184406624  
 O,0,3.2073839759,2.3615856291,-5.040543496  
 O,0,1.7107878796,3.2188172556,-3.0873385985  
 O,0,3.8458200374,1.8353408955,-2.6621504357  
 H,0,-0.0528909761,0.425551694,-2.087748653  
 H,0,4.1381321019,2.469857487,-4.79009835

### LG 1.9 Nuc 3.1

grid1lg19.7

E(RB+HF-LYP) = -1626.32688428

Zero-point correction= 0.262172  
 (Hartree/Particle)  
 Thermal correction to Energy= 0.283806  
 Thermal correction to Enthalpy= 0.284750  
 Thermal correction to Gibbs Free Energy= 0.209297  
 Sum of electronic and zero-point Energies= -  
 1626.064713  
 Sum of electronic and thermal Energies= -  
 1626.043079  
 Sum of electronic and thermal Enthalpies= -  
 1626.042134  
 Sum of electronic and thermal Free Energies= -  
 1626.117587

|       | E (Thermal)<br>KCal/Mol | CV<br>Cal/Mol-Kelvin | S<br>Cal/Mol-Kelvin |
|-------|-------------------------|----------------------|---------------------|
| Total | 178.091                 | 81.050               | 158.804             |

C,0,1.0509156765,1.5484516414,-0.2587410404  
 C,0,0.6963633882,0.3645590494,-1.1814165566  
 O,0,1.6477519214,-0.5729125703,-1.1795046704  
 C,0,2.7344257381,-0.238355536,-0.2573273119  
 C,0,2.5820973854,1.2692564927,0.0742746739  
 C,0,2.6835092005,-1.2069157066,0.9165361976  
 O,0,1.5483432379,-1.0466518422,1.7590239383  
 N,0,-0.771483716,-0.5654328873,-0.4129512957  
 C,0,-0.9917163078,-1.8668065094,-0.7732767625  
 N,0,-2.1512623692,-2.3836893441,-0.385939914  
 C,0,-2.7534035739,-1.3329679848,0.2641233213  
 C,0,-1.910872336,-0.1991291454,0.2439042407  
 N,0,-2.173418915,-1.0229757705,0.8049530708  
 C,0,-3.3310052013,1.0845846216,1.3797551451  
 N,0,-4.2268528282,0.0433018866,1.4475459848  
 C,0,-4.0359173301,-1.2663056587,0.9123299974  
 O,0,-4.9218811409,-2.1081137956,1.0603956801  
 O,0,3.5044988162,2.0688635587,-0.575735302  
 O,0,0.7274102841,2.7968075537,-0.7346046607  
 H,0,2.7417466285,-2.2414211378,0.5326726602  
 H,0,3.5630711111,-1.0408316506,1.5518441848  
 H,0,3.6491260304,-0.3893386991,-0.836791772  
 H,0,-3.6507394342,2.0104918786,1.8553037268  
 H,0,2.7169779454,1.4166326124,1.156129104  
 H,0,0.5010867781,1.394245798,0.6780581752  
 H,0,1.117015529,2.9599809009,-1.6899730188  
 H,0,3.4255084045,1.8843185546,-1.6023097272  
 H,0,-5.1159018808,0.172019707,1.9150244301  
 H,0,0.763647638,-1.0494007167,1.1815385167  
 H,0,-0.2445318536,-2.407312644,-1.3404199351  
 O,0,1.0246779421,0.9246432632,-4.2126727175  
 P,0,2.086597198,1.9406700612,-3.8062654034  
 O,0,2.8720382658,2.4534756512,-5.2295325953  
 O,0,1.5406206979,3.2211505456,-3.1276269726  
 O,0,3.3010614961,1.3553821947,-3.0032116484  
 H,0,0.2685365734,0.5296780491,-2.1746185985  
 H,0,3.7942034703,2.3187636574,-4.9608269845

### LG 2.1 Nuc 1.9

gridlg21.1

E(RB+HF-LYP) = -1626.32174866

Zero-point correction= 0.265318  
 (Hartree/Particle)  
 Thermal correction to Energy= 0.285909  
 Thermal correction to Enthalpy= 0.286853  
 Thermal correction to Gibbs Free Energy= 0.215529  
 Sum of electronic and zero-point Energies= -  
 1626.056430  
 Sum of electronic and thermal Energies= -  
 1626.035840  
 Sum of electronic and thermal Enthalpies= -  
 1626.034895  
 Sum of electronic and thermal Free Energies= -  
 1626.106219

|       | E (Thermal)<br>KCal/Mol | CV<br>Cal/Mol-Kelvin | S<br>Cal/Mol-Kelvin |
|-------|-------------------------|----------------------|---------------------|
| Total | 179.411                 | 79.293               | 150.114             |

C,0,0.8965778144,1.6318854792,-0.5140406463  
 C,0,0.6453454047,0.4675954752,-1.4968173413  
 O,0,1.5023524281,-0.5462907549,-1.3222041696  
 C,0,2.6216323575,-0.1461971299,-0.4782828196  
 C,0,2.3401203164,1.2839973645,0.0515561473  
 C,0,2.7486961014,-1.2177173097,0.5946281645  
 O,0,1.6438539275,-1.2611300365,1.4820708792  
 N,0,-0.7530486114,-0.553548274,-0.3086440562  
 C,0,-1.0621730053,-1.7864115218,-0.8226764028  
 N,0,-2.2637420632,-2.2953734716,-0.5433233226  
 C,0,-2.8177097371,-1.3147075173,0.2407797802  
 C,0,-1.8877292403,-0.2525347834,0.3869328847  
 N,0,-2.0908430315,0.8913368259,1.1266958732  
 C,0,-3.2511275253,0.9475011052,1.6954440235  
 N,0,-4.217391293,-0.0284801046,1.5984363802  
 C,0,-4.1032894113,-1.2552175169,0.8747614701  
 O,0,-5.0547991757,-2.042565492,0.8925490746  
 O,0,3.3731288506,2.1875763748,-0.2265338074  
 O,0,0.6672501147,2.9282812061,-0.955027255  
 H,0,2.9002480807,-2.197242925,0.1039436065  
 H,0,3.6420735664,-1.0098135721,1.1995351639  
 H,0,3.5048854993,-0.1208909613,-1.1236450017  
 H,0,-3.5192405309,1.8111061473,2.3038487521  
 H,0,2.2550761412,1.2480204648,1.1437223249  
 H,0,0.1991255407,1.4882960751,0.3113699466  
 H,0,1.231816948,3.1663195418,-1.7434735018  
 H,0,3.6262587003,2.0886515532,-1.1952157107  
 H,0,-5.1036954859,0.0876498607,2.0737993832  
 H,0,0.838056064,-1.1329904391,0.9382051505  
 H,0,-0.3424849232,-2.3067955152,-1.4456916981  
 O,0,1.3537148343,1.1349857054,-3.128625981  
 P,0,2.5437955879,2.1274155899,-3.4330074365  
 O,0,2.8058311833,1.9285867825,-5.083799499  
 O,0,2.1370192455,3.5740787299,-3.189258045  
 O,0,3.871374433,1.6621583475,-2.795634573  
 H,0,-0.2048518589,0.3242374005,-2.1262483512  
 H,0,3.5861372232,1.3528949158,-5.0964632263

### LG 2.1 Nuc 2.1

gridlg21.2

E(RB+HF-LYP) = -1626.32175573

Zero-point correction= 0.264412  
 (Hartree/Particle)  
 Thermal correction to Energy= 0.286086  
 Thermal correction to Enthalpy= 0.287031  
 Thermal correction to Gibbs Free Energy= 0.210007

Sum of electronic and zero-point Energies= -  
 1626.057344  
 Sum of electronic and thermal Energies= -  
 1626.035669  
 Sum of electronic and thermal Enthalpies= -  
 1626.034725  
 Sum of electronic and thermal Free Energies= -  
 1626.111749

|       | E (Thermal)<br>KCal/Mol | CV<br>Cal/Mol-Kelvin | S<br>Cal/Mol-Kelvin |
|-------|-------------------------|----------------------|---------------------|
| Total | 179.522                 | 81.460               | 162.110             |

C,0,0.888919946,1.6247046392,-0.528192421  
 C,0,0.6128931373,0.4294865482,-1.4592977501  
 O,0,1.4831453112,-0.5554128346,-1.3233277741  
 C,0,2.6200212315,-0.1482780608,-0.4941760518  
 C,0,2.338665922,1.282612221,0.0328538349  
 C,0,2.7658296561,-1.2201391049,0.574272497  
 O,0,1.6719771284,-1.2713963988,1.4772480396  
 N,0,-0.8244748018,-0.5758093015,-0.304589508  
 C,0,-1.1245811102,-1.8246678058,-0.7805335116  
 N,0,-2.3115374673,-2.3386002363,-0.4561534724  
 C,0,-2.8618180649,-1.3399509616,0.3085207174  
 C,0,-1.9481152738,-0.2597617937,0.4010286205  
 N,0,-2.1517603683,0.9065740243,1.1023416949  
 C,0,-3.3021222934,0.9663710834,1.6909285833  
 N,0,-4.2544492325,-0.0266764263,1.6482022611  
 C,0,-4.1363609356,-1.2763118403,0.9660186511  
 O,0,-5.0742259431,-2.0762390255,1.0282885253  
 O,0,3.3657815531,2.1850921315,-0.2483178497  
 O,0,0.6545922422,2.9012089945,-1.009586955  
 H,0,2.9168540464,-2.1988272571,0.0829300438  
 H,0,3.6636418283,-1.0062607896,1.1692202108  
 H,0,3.4829086352,-0.1195511878,-1.1658165993  
 H,0,-3.5717278841,1.8477345979,2.2721979912  
 H,0,2.2546058123,1.2446726101,1.1256290251  
 H,0,0.1984382663,1.5027355042,0.3096097386  
 H,0,1.2337405195,3.1316644345,-1.8004619551  
 H,0,3.6217919001,2.0925364411,-1.2239211531  
 H,0,-5.1337690164,0.0946254389,2.1352272096  
 H,0,0.8564381969,-1.1699422889,0.9456546062  
 H,0,-0.4108992167,-2.3526685751,-1.4040068959  
 O,0,1.427024485,1.0930902068,-3.2777634611  
 P,0,2.586711984,2.1192315327,-3.4746885933  
 O,0,2.9847147354,2.0311689091,-5.114681587  
 O,0,2.1413118903,3.5496298355,-3.1703602408  
 O,0,3.9050746645,1.674854774,-2.785694543  
 H,0,-0.1638981562,0.3378302654,-2.1879995376  
 H,0,3.8569011423,1.6093373164,-5.0709362305

### LG 2.1 Nuc 2.3

gridlg21.3

E(RB+HF-LYP) = -1626.32231452

|                                              |          |
|----------------------------------------------|----------|
| Zero-point correction=                       | 0.263683 |
| (Hartree/Particle)                           |          |
| Thermal correction to Energy=                | 0.285387 |
| Thermal correction to Enthalpy=              | 0.286331 |
| Thermal correction to Gibbs Free Energy=     | 0.209717 |
| Sum of electronic and zero-point Energies=   | -        |
| 1626.058631                                  |          |
| Sum of electronic and thermal Energies=      | -        |
| 1626.036927                                  |          |
| Sum of electronic and thermal Enthalpies=    | -        |
| 1626.035983                                  |          |
| Sum of electronic and thermal Free Energies= | -        |
| 1626.112598                                  |          |

|       | E (Thermal)<br>KCal/Mol | CV<br>Cal/Mol-Kelvin | S<br>Cal/Mol-Kelvin |
|-------|-------------------------|----------------------|---------------------|
| Total | 179.083                 | 81.486               | 161.249             |

C,0,0.88626134,1.6320890066,-0.5332509243  
 C,0,0.5955737075,0.4178894499,-1.4309979045  
 O,0,1.4845799276,-0.5402768592,-1.3306040862  
 C,0,2.6164362808,-0.142022565,-0.4814281839  
 C,0,2.3423260613,1.2982310672,0.0239316682  
 C,0,2.7369140454,-1.2077071406,0.5952950619  
 O,0,1.6378640833,-1.2363885739,1.4940920211  
 N,0,-0.8691767412,-0.5915225659,-0.3149372088  
 C,0,-1.1726084427,-1.8383371453,-0.7912816627  
 N,0,-2.3506220922,-2.353838529,-0.4417290425  
 C,0,-2.888010088,-1.3568054511,0.3349580194  
 C,0,-1.9789208472,-0.2727922259,0.4106465877  
 N,0,-2.1705091649,0.8924379836,1.1152295108  
 C,0,-3.3090499603,0.947597124,1.7272923017  
 N,0,-4.2576795859,-0.0490416402,1.7040264361  
 C,0,-4.149325386,-1.298248308,1.0192489446  
 O,0,-5.0816151257,-2.1018524827,1.0997543068  
 O,0,3.3638166134,2.1922179239,-0.2850241902  
 O,0,0.6527579255,2.8887217248,-1.0568700805  
 H,0,2.8772268104,-2.1923738981,0.1134107058  
 H,0,3.6330696729,-1.0018698119,1.1949473487  
 H,0,3.4814074725,-0.1292643875,-1.150428362  
 H,0,-3.5697494343,1.8279825175,2.3137544541  
 H,0,2.2645536327,1.2769617249,1.1181212208  
 H,0,0.2005617334,1.5305766622,0.3135250209  
 H,0,1.2514935681,3.1054940779,-1.8505917679  
 H,0,3.6081336814,2.0820020829,-1.2690349372  
 H,0,-5.1269585067,0.0688596034,2.2096451588  
 H,0,0.8238157446,-1.1559151254,0.9580019059  
 H,0,-0.4694233601,-2.3617364043,-1.4301763508  
 O,0,1.4663070549,1.0391792848,-3.46712645  
 P,0,2.6085273064,2.0793392322,-3.5382562069  
 O,0,3.1385209238,2.1075231036,-5.1480766953  
 O,0,2.1399742728,3.4948300885,-3.1733669687  
 O,0,3.8998768178,1.6311937487,-2.7882225261  
 H,0,-0.1071263897,0.3765704435,-2.2398639488  
 H,0,4.0530209185,1.8049638836,-5.0349470162

### LG 2.1 Nuc 2.5

gridlg21.4

E(RB+HF-LYP) = -1626.32351965

|                                              |          |
|----------------------------------------------|----------|
| Zero-point correction=                       | 0.263117 |
| (Hartree/Particle)                           |          |
| Thermal correction to Energy=                | 0.284629 |
| Thermal correction to Enthalpy=              | 0.285573 |
| Thermal correction to Gibbs Free Energy=     | 0.211033 |
| Sum of electronic and zero-point Energies=   | -        |
| 1626.060402                                  |          |
| Sum of electronic and thermal Energies=      | -        |
| 1626.038891                                  |          |
| Sum of electronic and thermal Enthalpies=    | -        |
| 1626.037947                                  |          |
| Sum of electronic and thermal Free Energies= | -        |
| 1626.112486                                  |          |

|       | E (Thermal)<br>KCal/Mol | CV<br>Cal/Mol-Kelvin | S<br>Cal/Mol-Kelvin |
|-------|-------------------------|----------------------|---------------------|
| Total | 178.607                 | 81.259               | 156.882             |

C,0,0.9801658535,1.64118094,-0.4378649832  
 C,0,0.6561259347,0.4491474288,-1.3526050817  
 O,0,1.5710602864,-0.4817644639,-1.3336725474  
 C,0,2.6647583221,-0.1601193552,-0.4005579667  
 C,0,2.4682324792,1.3140553273,0.0356797178



C,0,2.6322939839,-1.1954769893,0.713733541  
 O,0,1.5210755454,-1.0762220969,1.5869819039  
 N,0,-0.8230024585,-0.6017556746,-0.2953537834  
 C,0,-1.1208295774,-1.8333939973,-0.8136146501  
 N,0,-2.3093489169,-2.3467023283,-0.5043338043  
 C,0,-2.860599796,-1.3635639968,0.2816434054  
 C,0,-1.9496207813,-0.2875660867,0.4072581811  
 N,0,-2.1501314893,0.86215251,1.1325307444  
 C,0,-3.3044405871,0.9108166005,1.7155379725  
 N,0,-4.2574965456,-0.0790216597,1.6451953718  
 C,0,-4.1384359456,-1.3135549923,0.9358741315  
 O,0,-5.0744468662,-2.1149644063,0.9767844133  
 O,0,3.4710063775,2.1613901584,-0.4152219925  
 O,0,0.7230390718,2.8968009454,-0.9469741576  
 H,0,2.6806932085,-2.2051325832,0.2666001835  
 H,0,3.5313393655,-1.0665480321,1.3309723774  
 H,0,3.5702399058,-0.2481121201,-1.0053471622  
 H,0,-3.57529312,1.77966174,2.3142284557  
 H,0,2.4741918902,1.3619664606,1.1323117175  
 H,0,0.3389472027,1.5180941857,0.4420610197  
 H,0,1.2738600335,3.0985277728,-1.7941925454  
 H,0,3.598752408,2.002419604,-1.4238476617  
 H,0,-5.1392411429,0.033335886,2.1301329765  
 H,0,0.7176263427,-1.0087629902,1.0309635994  
 H,0,-0.4053195762,-2.342476011,-1.4498571132  
 O,0,1.2817698351,1.0187500968,-3.7050760709  
 P,0,2.4463740412,2.0187719086,-3.6421814551  
 O,0,3.0444101057,2.1989747326,-5.2209376599  
 O,0,2.0250616507,3.4174381763,-3.150366652  
 O,0,3.7116943427,1.4794414065,-2.8986794359  
 H,0,0.0183334998,0.4825744501,-2.2199329837  
 H,0,3.9693995862,1.9443050734,-5.0782058456

## LG 2.1 Nuc 2.7

gridlg21.5

E(RB+HF-LYP) = -1626.32471629

Zero-point correction= 0.262554  
 (Hartree/Particle)  
 Thermal correction to Energy= 0.284094  
 Thermal correction to Enthalpy= 0.285039  
 Thermal correction to Gibbs Free Energy= 0.210264  
 Sum of electronic and zero-point Energies= -  
 1626.062162  
 Sum of electronic and thermal Energies= -  
 1626.040622  
 Sum of electronic and thermal Enthalpies= -  
 1626.039678  
 Sum of electronic and thermal Free Energies= -  
 1626.114452

|       | E (Thermal)<br>KCal/Mol | CV<br>Cal/Mol-Kelvin | S<br>Cal/Mol-Kelvin |
|-------|-------------------------|----------------------|---------------------|
| Total | 178.272                 | 81.212               | 157.376             |

C,0,1.014898916,1.6374946307,-0.3863758755  
 C,0,0.6853263775,0.4558333227,-1.3076799319  
 O,0,1.6099788569,-0.4638665359,-1.3178816221  
 C,0,2.6899475635,-0.1666038156,-0.3605611891  
 C,0,2.516380288,1.3182194741,0.0494931733  
 C,0,2.6107771774,-1.1910109468,0.7623548745  
 O,0,1.4938832016,-1.0314082658,1.6217289394  
 N,0,-0.8229165226,-0.6082211826,-0.3061843869  
 C,0,-1.125574468,-1.8326720192,-0.8377967355  
 N,0,-2.3169918189,-2.339912865,-0.5325172113  
 C,0,-2.8632304766,-1.3596600299,0.2611969714  
 C,0,-1.94841599,-0.2891115754,0.3961087907  
 N,0,-2.1415473093,0.8555653898,1.1301849663  
 C,0,-3.2959778991,0.9058547175,1.7129808067

N,0,-4.2537686987,-0.0784818637,1.6349435184  
 C,0,-4.1407254744,-1.3085851241,0.9169177767  
 O,0,-5.080019257,-2.1057754479,0.9514977724  
 O,0,3.4996630322,2.1481529988,-0.4644397929  
 O,0,0.7474334039,2.888944587,-0.8960204982  
 H,0,2.6347484632,-2.2051964384,0.323915909  
 H,0,3.5050842441,-1.0844868073,1.3904890492  
 H,0,3.6044760177,-0.2854177041,-0.9459909722  
 H,0,-3.5623068858,1.7716517893,2.3179294031  
 H,0,2.5609670324,1.393556883,1.1441666767  
 H,0,0.3933737624,1.5081109617,0.5070081508  
 H,0,1.2536619028,3.0658045953,-1.785472761  
 H,0,3.5681479553,1.9755672514,-1.4825405795  
 H,0,-5.1351718637,0.0349863733,2.1202950835  
 H,0,0.6945299311,-0.9832625618,1.0584624831  
 H,0,-0.4123104947,-2.3389455815,-1.4784881927  
 O,0,1.2466078953,0.9540927137,-3.9012688248  
 P,0,2.3726743276,1.9738306317,-3.7106104492  
 O,0,3.0536044557,2.2715448428,-5.2391509755  
 O,0,1.8988594072,3.3379063544,-3.160969006  
 O,0,3.6196634569,1.4360551308,-2.9308111801  
 H,0,0.1032004889,0.5305027093,-2.2189839618  
 H,0,3.9833134714,2.0736110279,-5.0462640386

## LG 2.1 Nuc 2.9

gridlg21.6

E(RB+HF-LYP) = -1626.32471290

Zero-point correction= 0.261962  
 (Hartree/Particle)  
 Thermal correction to Energy= 0.283667  
 Thermal correction to Enthalpy= 0.284611  
 Thermal correction to Gibbs Free Energy= 0.208887  
 Sum of electronic and zero-point Energies= -  
 1626.062751  
 Sum of electronic and thermal Energies= -  
 1626.041046  
 Sum of electronic and thermal Enthalpies= -  
 1626.040102  
 Sum of electronic and thermal Free Energies= -  
 1626.115826

|       | E (Thermal)<br>KCal/Mol | CV<br>Cal/Mol-Kelvin | S<br>Cal/Mol-Kelvin |
|-------|-------------------------|----------------------|---------------------|
| Total | 178.004                 | 81.255               | 159.376             |

C,0,1.036176566,1.6363830956,-0.3615421925  
 C,0,0.7071858151,0.4608522287,-1.2866951828  
 O,0,1.6313797278,-0.458801525,-1.3053740213  
 C,0,2.70121439,-0.1741707153,-0.3322877391  
 C,0,2.5437997435,1.3187488472,0.0557861324  
 C,0,2.5898986846,-1.1875126231,0.7980909715  
 O,0,1.4647938675,-1.0035093055,1.6419712097  
 N,0,-0.8305105664,-0.6024924321,-0.3302536527  
 C,0,-1.1331754039,-1.8268580211,-0.8611858259  
 N,0,-2.320001817,-2.3367898717,-0.5438798218  
 C,0,-2.8614783703,-1.3583641226,0.2553858291  
 C,0,-1.949879731,-0.2845603033,0.382209482  
 N,0,-2.1388461692,0.8591322459,1.1183074719  
 C,0,-3.2875703723,0.9050789308,1.7127217925  
 N,0,-4.2424902768,-0.0824932972,1.6439480586  
 C,0,-4.1324302913,-1.3121096997,0.9246044103  
 O,0,-5.0680415793,-2.1127400843,0.9683336886  
 O,0,3.5155223749,2.1324388602,-0.4994387992  
 O,0,0.7663930997,2.8850258638,-0.8732127873  
 H,0,2.6039699339,-2.2056485503,0.3688096983  
 H,0,3.4770033306,-1.0898598053,1.4376533546  
 H,0,3.6217204002,-0.3148342437,-0.9031463146  
 H,0,-3.5506669373,1.7697804676,2.3205451374

H,0,2.6107598763,1.4153055042,1.1480030649  
H,0,0.4242185836,1.5047623321,0.5381716113  
H,0,1.2396957771,3.0420088838,-1.7906525789  
H,0,3.538124787,1.9460206843,-1.5224219177  
H,0,-5.1191629548,0.0275657144,2.1385880226  
H,0,0.6711847086,-0.9700406271,1.070369723  
H,0,-0.4242196361,-2.3303156871,-1.5086428591  
O,0,1.2313281431,0.9290448347,-4.100244006  
P,0,2.3245133988,1.9445281613,-3.7740134279  
O,0,3.1059038043,2.3375131886,-5.2326960258  
O,0,1.8077701886,3.2773638178,-3.1805800997  
O,0,3.5283281056,1.3842119382,-2.9394270923  
H,0,0.1525457132,0.5549202626,-2.2172149584  
H,0,4.0272875561,2.1850826724,-4.9709241957

### LG 2.1 Nuc 3.1

gridlg21.7

E(RB+HF-LYP) = -1626.32392738

Zero-point correction= 0.261549  
(Hartree/Particle)  
Thermal correction to Energy= 0.283345  
Thermal correction to Enthalpy= 0.284289  
Thermal correction to Gibbs Free Energy= 0.207762  
Sum of electronic and zero-point Energies= -  
1626.062378  
Sum of electronic and thermal Energies= -  
1626.040582  
Sum of electronic and thermal Enthalpies= -  
1626.039638  
Sum of electronic and thermal Free Energies= -  
1626.116165

|       | E (Thermal)<br>KCal/Mol | CV<br>Cal/Mol-Kelvin | S<br>Cal/Mol-Kelvin |
|-------|-------------------------|----------------------|---------------------|
| Total | 177.802                 | 81.247               | 161.064             |

C,0,1.0365676616,1.6382762436,-0.3638142548  
C,0,0.7025856774,0.4597739554,-1.2812892312  
O,0,1.6206444215,-0.4622610251,-1.3067981452  
C,0,2.6958948311,-0.1812705381,-0.3354646077  
C,0,2.545209925,1.3139896888,0.0498441761  
C,0,2.5846898449,-1.193074043,0.7958728546  
O,0,1.4640207742,-1.0049074475,1.6448546949  
N,0,-0.8430172878,-0.5976596055,-0.3310572197  
C,0,-1.1372139158,-1.8319903741,-0.8433803624  
N,0,-2.3167406795,-2.3483304377,-0.5098906886  
C,0,-2.8614155711,-1.3643575305,0.2802640325  
C,0,-1.9596726366,-0.2802321953,0.3857418005  
N,0,-2.1541517171,0.8718335606,1.1070617755  
C,0,-3.29850224,0.9144843468,1.7100854032  
N,0,-4.2440328671,-0.0833763699,1.6626147149  
C,0,-4.1276134301,-1.321333322,0.9589789694  
O,0,-5.054619354,-2.1305213601,1.0205738675  
O,0,3.5146639327,2.1215622792,-0.5145463238  
O,0,0.7734303651,2.8808204109,-0.8879335963  
H,0,2.5943793529,-2.2121392011,0.3689499679  
H,0,3.4748511292,-1.0963210002,1.4312390245  
H,0,3.6121397456,-0.3260044943,-0.9116117826  
H,0,-3.5654410163,1.7848019151,2.3080881608  
H,0,2.6157291873,1.4118648573,1.1419364346  
H,0,0.4262118582,1.5149845222,0.5386698363  
H,0,1.2369451065,3.0224879411,-1.8207566704  
H,0,3.5141985473,1.9325821688,-1.5428839569  
H,0,-5.1176890914,0.0248531823,2.162981802  
H,0,0.6673038679,-0.9740839236,1.0779571419  
H,0,-0.428181473,-2.3379678976,-1.4887598339  
O,0,1.2674812666,0.9452488736,-4.2904751189  
P,0,2.3223026764,1.941785157,-3.8278487137

O,0,3.2175006645,2.4136455924,-5.1967613516  
O,0,1.7633864601,3.2470614003,-3.2061659735  
O,0,3.4652580788,1.3468091993,-2.9288920608  
H,0,0.1393642061,0.555104762,-2.2066794502  
H,0,4.1157761689,2.2685283288,-4.8610391551

### LG 2.3 Nuc 1.9

gridlg23.1

E(RB+HF-LYP) = -1626.34068665

Zero-point correction= 0.265234  
(Hartree/Particle)  
Thermal correction to Energy= 0.285753  
Thermal correction to Enthalpy= 0.286697  
Thermal correction to Gibbs Free Energy= 0.215738  
Sum of electronic and zero-point Energies= -  
1626.075453  
Sum of electronic and thermal Energies= -  
1626.054934  
Sum of electronic and thermal Enthalpies= -  
1626.053990  
Sum of electronic and thermal Free Energies= -  
1626.124949

|       | E (Thermal)<br>KCal/Mol | CV<br>Cal/Mol-Kelvin | S<br>Cal/Mol-Kelvin |
|-------|-------------------------|----------------------|---------------------|
| Total | 179.312                 | 79.089               | 149.345             |

C,0,1.0090944175,1.6656058587,-0.5012403575  
C,0,0.7526981913,0.5406356515,-1.5156377918  
O,0,1.5718385105,-0.4890257757,-1.3288180824  
C,0,2.6693576061,-0.1483690536,-0.4223043319  
C,0,2.449754448,1.3080632889,0.0555978084  
C,0,2.6636105383,-1.1988011538,0.680810603  
O,0,1.554085788,-1.1080914176,1.5509634568  
N,0,-0.7431189905,-0.616521051,-0.2066254979  
C,0,-1.0631791119,-1.8006815135,-0.8163221013  
N,0,-2.2991441465,-2.2788848833,-0.6491198317  
C,0,-2.8657856331,-1.3300738529,0.1651138582  
C,0,-1.9056126559,-0.3204192391,0.4389011262  
N,0,-2.1105635902,0.784698034,1.2362406354  
C,0,-3.3023333413,0.8545574668,1.7346971887  
N,0,-4.2966445462,-0.0731533814,1.5169865502  
C,0,-4.1844151112,-1.2568540124,0.7235460645  
O,0,-5.166426074,-2.0015730907,0.6333640163  
O,0,3.498509711,2.1714912866,-0.2872055754  
O,0,0.7779640161,2.9775669801,-0.8931717179  
H,0,2.7293125914,-2.1995287044,0.213363675  
H,0,3.5672806054,-1.0642662507,1.2926014472  
H,0,3.5862835944,-0.2065044399,-1.0156130225  
H,0,-3.5772847567,1.6903691828,2.3781859747  
H,0,2.389087495,1.3223314225,1.1491729785  
H,0,0.3054938642,1.4687332862,0.3122736565  
H,0,1.3339906759,3.2244096652,-1.6845672248  
H,0,3.7080142399,2.0367908399,-1.2603435284  
H,0,-5.2070587318,0.051352477,1.9419091092  
H,0,0.7528077035,-0.9820539955,0.9892606426  
H,0,-0.3254833009,-2.3106456464,-1.4278850029  
O,0,1.2947677934,1.1996148766,-3.2132543961  
P,0,2.5520182991,2.1360816285,-3.4684122974  
O,0,2.7794158508,2.0008778011,-5.1268051004  
O,0,2.231634116,3.5890403798,-3.1559133338  
O,0,3.8399061891,1.5507336795,-2.8584980294  
H,0,-0.1795887112,0.352264315,-2.0015800505  
H,0,3.4719568944,1.3248969613,-5.1900053576

### LG 2.3 Nuc 2.1

gridlg23.2

E(RB+HF-LYP) = -1626.33471648

Zero-point correction= 0.264422  
 (Hartree/Particle)  
 Thermal correction to Energy= 0.285951  
 Thermal correction to Enthalpy= 0.286895  
 Thermal correction to Gibbs Free Energy= 0.211986  
 Sum of electronic and zero-point Energies= -  
 1626.070294  
 Sum of electronic and thermal Energies= -  
 1626.048765  
 Sum of electronic and thermal Enthalpies= -  
 1626.047821  
 Sum of electronic and thermal Free Energies= -  
 1626.122730

|       | E (Thermal)<br>KCal/Mol | CV<br>Cal/Mol-Kelvin | S<br>Cal/Mol-Kelvin |
|-------|-------------------------|----------------------|---------------------|
| Total | 179.437                 | 81.213               | 157.659             |

C,0,0.9891769593,1.6572050017,-0.5265982397  
 C,0,0.7261071151,0.4940688075,-1.4887929912  
 O,0,1.5628972551,-0.5010203158,-1.3343075299  
 C,0,2.6644811733,-0.1468540338,-0.4250232416  
 C,0,2.4358446397,1.3144734979,0.0345663022  
 C,0,2.6599603209,-1.190639576,0.6830956249  
 O,0,1.5542067453,-1.0954775722,1.5579833837  
 N,0,-0.7836960194,-0.6515319032,-0.1856842793  
 C,0,-1.1183602935,-1.8315988435,-0.7947905428  
 N,0,-2.3545819988,-2.2997309928,-0.6097049477  
 C,0,-2.9045537109,-1.3443962976,0.209136023  
 C,0,-1.9366478334,-0.3404428133,0.4697734941  
 N,0,-2.1230203329,0.768153825,1.265490798  
 C,0,-3.3087641738,0.8477751742,1.7772330822  
 N,0,-4.3111163348,-0.0741120211,1.5743902751  
 C,0,-4.2165409063,-1.2608152382,0.7831816653  
 O,0,-5.2025353728,-2.0005780724,0.7077088847  
 O,0,3.4764934638,2.1761826831,-0.3148685333  
 O,0,0.747717347,2.9474482966,-0.9664020501  
 H,0,2.7255701889,-2.194244994,0.2224860798  
 H,0,3.5649032379,-1.0505245638,1.2908386179  
 H,0,3.57206449,-0.2070596091,-1.0309658065  
 H,0,-3.5704451917,1.68758723,2.42069793  
 H,0,2.36970689,1.335272669,1.128194539  
 H,0,0.2891029097,1.483587335,0.2975251701  
 H,0,1.3241721258,3.1864000738,-1.7565479738  
 H,0,3.6848767648,2.0435680416,-1.296145972  
 H,0,-5.2156258377,0.0582258407,2.0095286712  
 H,0,0.7454802179,-0.9936603989,1.0034899755  
 H,0,-0.3920541578,-2.3471313656,-1.41539283  
 O,0,1.3508941582,1.1597318802,-3.3799652789  
 P,0,2.5806367844,2.123825338,-3.5190439585  
 O,0,2.9603303785,2.0859106622,-5.1610669991  
 O,0,2.2239305716,3.5613252102,-3.1487119643  
 O,0,3.8594218821,1.5589275693,-2.8515021262  
 H,0,-0.1479000415,0.3371173954,-2.0853109619  
 H,0,3.7801110559,1.5676996998,-5.15482813

### LG 2.3 Nuc 2.3

grid1lg23.3

E(RB+HF-LYP) = -1626.33077790

Zero-point correction= 0.263595  
 (Hartree/Particle)  
 Thermal correction to Energy= 0.285189  
 Thermal correction to Enthalpy= 0.286133  
 Thermal correction to Gibbs Free Energy= 0.211213  
 Sum of electronic and zero-point Energies= -  
 1626.067183

Sum of electronic and thermal Energies= -  
 1626.045589  
 Sum of electronic and thermal Enthalpies= -  
 1626.044645  
 Sum of electronic and thermal Free Energies= -  
 1626.119565

|       | E (Thermal)<br>KCal/Mol | CV<br>Cal/Mol-Kelvin | S<br>Cal/Mol-Kelvin |
|-------|-------------------------|----------------------|---------------------|
| Total | 178.959                 | 81.329               | 157.683             |

C,0,0.9908100363,1.6574386248,-0.5215744155  
 C,0,0.7138768969,0.4742863754,-1.4500931202  
 O,0,1.5711487013,-0.4925169144,-1.3387560079  
 C,0,2.6717865518,-0.142856195,-0.4165845474  
 C,0,2.4486689122,1.3248059982,0.0260152693  
 C,0,2.6490111094,-1.1810645081,0.6958597308  
 O,0,1.5441716235,-1.0674515605,1.5701126939  
 N,0,-0.8136218301,-0.6775771283,-0.1733959041  
 C,0,-1.1556085961,-1.8544585423,-0.7838249511  
 N,0,-2.3913713735,-2.3167577022,-0.5879704449  
 C,0,-2.9319550921,-1.3580859724,0.2340031545  
 C,0,-1.9609370042,-0.3567985851,0.4874427829  
 N,0,-2.1366043183,0.7535406831,1.2818727119  
 C,0,-3.3189667058,0.8381795182,1.8010687753  
 N,0,-4.3251747827,-0.0808215018,1.6068035284  
 C,0,-4.2402202764,-1.2692247585,0.8169543359  
 O,0,-5.22786848,-2.0064495588,0.7494346979  
 O,0,3.4790904578,2.1800499148,-0.3514564191  
 O,0,0.7421112762,2.9300450948,-0.9967456372  
 H,0,2.7036888734,-2.1879696671,0.2416918772  
 H,0,3.5541308058,-1.0479890018,1.3043111454  
 H,0,3.5761933101,-0.2156609707,-1.0249335783  
 H,0,-3.573403704,1.6803009615,2.4441546671  
 H,0,2.3943283634,1.3576519481,1.1204325296  
 H,0,0.3018859679,1.499595986,0.3172333081  
 H,0,1.3251372328,3.1584909431,-1.7986829135  
 H,0,3.6679167907,2.0377538525,-1.3426989328  
 H,0,-5.2264549238,0.0557914599,2.0473766296  
 H,0,0.7317450772,-0.9882348234,1.0183266535  
 H,0,-0.4357261977,-2.3715538229,-1.4105472478  
 O,0,1.3716791676,1.1205417252,-3.5571402378  
 P,0,2.5795286177,2.096553297,-3.5754352217  
 O,0,3.0914280028,2.1715049622,-5.185366732  
 O,0,2.1966166492,3.5164269223,-3.1421808106  
 O,0,3.8361781545,1.5275214285,-2.8559404038  
 H,0,-0.0978598009,0.3609735599,-2.1404607814  
 H,0,3.956884977,1.7386855777,-5.1196400203

### LG 2.3 Nuc 2.5

grid1lg23.4

E(RB+HF-LYP) = -1626.32854804

Zero-point correction= 0.262850  
 (Hartree/Particle)  
 Thermal correction to Energy= 0.284445  
 Thermal correction to Enthalpy= 0.285389  
 Thermal correction to Gibbs Free Energy= 0.210572  
 Sum of electronic and zero-point Energies= -  
 1626.065698  
 Sum of electronic and thermal Energies= -  
 1626.044103  
 Sum of electronic and thermal Enthalpies= -  
 1626.043159  
 Sum of electronic and thermal Free Energies= -  
 1626.117976

|  | E (Thermal) | CV | S |
|--|-------------|----|---|
|--|-------------|----|---|

| Total | KCal/Mol | Cal/Mol-Kelvin | Cal/Mol-Kelvin |
|-------|----------|----------------|----------------|
|       | 178.492  | 81.353         | 157.465        |

C,0,1.014613669,1.6535880891,-0.4824669683  
 C,0,0.7268913416,0.4690479059,-1.4007396105  
 O,0,1.605468992,-0.4735406203,-1.3370837688  
 C,0,2.6944599031,-0.1439915311,-0.3881488325  
 C,0,2.4898738718,1.333740384,0.0307469011  
 C,0,2.627068534,-1.1723587918,0.7320859432  
 O,0,1.5190805315,-1.0189402921,1.5962649022  
 N,0,-0.8273442268,-0.7014936845,-0.1742889911  
 C,0,-1.1780822903,-1.8716219477,-0.7920928721  
 N,0,-2.4160353494,-2.3242607991,-0.592979978  
 C,0,-2.9474468715,-1.3639149161,0.2337467599  
 C,0,-1.9707033066,-0.3699501575,0.4884412577  
 N,0,-2.134976932,0.7390183503,1.286031966  
 C,0,-3.3160314343,0.8313247833,1.8072082434  
 N,0,-4.328939563,-0.0797354835,1.612444784  
 C,0,-4.2540695098,-1.2673378297,0.8202789746  
 O,0,-5.2459478204,-1.9980315704,0.7534917456  
 O,0,3.5023414657,2.1769508856,-0.403801359  
 O,0,0.7515854467,2.913209992,-0.9762474746  
 H,0,2.6573532466,-2.1841972409,0.2873577861  
 H,0,3.5292078616,-1.0605611519,1.3488623725  
 H,0,3.6054403676,-0.2441385792,-0.9820735194  
 H,0,-3.5629804011,1.6740206759,2.4522488927  
 H,0,2.4688647743,1.3896064211,1.1258529184  
 H,0,0.3464469952,1.4972488631,0.3743405916  
 H,0,1.3126338265,3.1228790613,-1.8139357609  
 H,0,3.6436618206,2.0193232775,-1.408348485  
 H,0,-5.228599995,0.0628690683,2.0544954641  
 H,0,0.7074027201,-0.9664771729,1.0407452306  
 H,0,-0.4637606931,-2.3896889662,-1.4241296114  
 O,0,1.3570926619,1.0471552175,-3.7499169485  
 P,0,2.5257046012,2.0460693134,-3.6445625478  
 O,0,3.1465340413,2.2424675279,-5.209157995  
 O,0,2.0955221804,3.4379955492,-3.1467372794  
 O,0,3.7686979574,1.4868957638,-2.8833591472  
 H,0,-0.0168041956,0.4102290462,-2.1743550637  
 H,0,4.058020249,1.9412681796,-5.0705523602

### LG 2.3 Nuc 2.7

grid1lg23.5

E(RB+HF-LYP) = -1626.32726116

|                                              |          |
|----------------------------------------------|----------|
| Zero-point correction=                       | 0.262077 |
| (Hartree/Particle)                           |          |
| Thermal correction to Energy=                | 0.283774 |
| Thermal correction to Enthalpy=              | 0.284719 |
| Thermal correction to Gibbs Free Energy=     | 0.209264 |
| Sum of electronic and zero-point Energies=   | -        |
| 1626.065184                                  |          |
| Sum of electronic and thermal Energies=      | -        |
| 1626.043487                                  |          |
| Sum of electronic and thermal Enthalpies=    | -        |
| 1626.042543                                  |          |
| Sum of electronic and thermal Free Energies= | -        |
| 1626.117998                                  |          |

| Total | E (Thermal)<br>KCal/Mol | CV<br>Cal/Mol-Kelvin | S<br>Cal/Mol-Kelvin |
|-------|-------------------------|----------------------|---------------------|
|       | 178.071                 | 81.374               | 158.808             |

C,0,1.0291788444,1.6603053985,-0.4517899537  
 C,0,0.7415990416,0.47899205,-1.369148104  
 O,0,1.6338044118,-0.4477839543,-1.3355642396  
 C,0,2.7064780976,-0.1383704411,-0.3597571024  
 C,0,2.5147141319,1.3464154051,0.0419042332  
 C,0,2.5999913153,-1.1622262353,0.7616984297

O,0,1.4823223162,-0.9861132729,1.6090792174  
 N,0,-0.8443954474,-0.7073508622,-0.1998708831  
 C,0,-1.2044123834,-1.870555513,-0.8249336634  
 N,0,-2.440033627,-2.321370049,-0.6113827509  
 C,0,-2.9584119304,-1.3660764288,0.2297287462  
 C,0,-1.9784404904,-0.3748449817,0.4786292067  
 N,0,-2.1289900204,0.7276117564,1.2870803715  
 C,0,-3.302494555,0.8170017446,1.8257298238  
 N,0,-4.3188465794,-0.0913855104,1.6382181164  
 C,0,-4.2562711971,-1.273483944,0.8368248159  
 O,0,-5.2485488572,-2.0037876083,0.7796857827  
 O,0,3.5133838591,2.1782658001,-0.4356265802  
 O,0,0.7647249311,2.9093758013,-0.9659088884  
 H,0,2.6190268281,-2.1756185737,0.3203631986  
 H,0,3.4938857447,-1.0656773492,1.392673919  
 H,0,3.6255100972,-0.2580758561,-0.9370297816  
 H,0,-3.5389931199,1.6548240447,2.4808070257  
 H,0,2.5161865643,1.4204775635,1.1365751202  
 H,0,0.3716887597,1.5113472283,0.4146724854  
 H,0,1.3039359033,3.0916816568,-1.8372830606  
 H,0,3.6150003166,2.0040674309,-3.4491519912  
 H,0,-5.2114875387,0.0479064173,2.0953391542  
 H,0,0.6767847156,-0.9524282136,1.0444016228  
 H,0,-0.4995653071,-2.3839965752,-1.4710192547  
 O,0,1.3620363808,0.9809032854,-3.9485155503  
 P,0,2.4891684298,1.9921229043,-3.7109498599  
 O,0,3.2230099362,2.2888796725,-5.2119880191  
 O,0,2.0069719581,3.3578795052,-3.1743022268  
 O,0,3.6991110005,1.4376358046,-2.8874281505  
 H,0,0.0613754029,0.4651360289,-2.2074315837  
 H,0,4.1432465362,2.0729834906,-4.9946634653

### LG 2.3 Nuc 2.9

grid1lg23.6

E(RB+HF-LYP) = -1626.32603090

|                                              |          |
|----------------------------------------------|----------|
| Zero-point correction=                       | 0.261473 |
| (Hartree/Particle)                           |          |
| Thermal correction to Energy=                | 0.283296 |
| Thermal correction to Enthalpy=              | 0.284240 |
| Thermal correction to Gibbs Free Energy=     | 0.207943 |
| Sum of electronic and zero-point Energies=   | -        |
| 1626.064558                                  |          |
| Sum of electronic and thermal Energies=      | -        |
| 1626.042735                                  |          |
| Sum of electronic and thermal Enthalpies=    | -        |
| 1626.041791                                  |          |
| Sum of electronic and thermal Free Energies= | -        |
| 1626.118088                                  |          |

| Total | E (Thermal)<br>KCal/Mol | CV<br>Cal/Mol-Kelvin | S<br>Cal/Mol-Kelvin |
|-------|-------------------------|----------------------|---------------------|
|       | 177.771                 | 81.378               | 160.580             |

C,0,1.0436501239,1.6708402416,-0.4353709845  
 C,0,0.7528263213,0.493351274,-1.3529664151  
 O,0,1.6463154314,-0.429959222,-1.3364047109  
 C,0,2.7096249028,-0.1387220509,-0.3434735698  
 C,0,2.5348592955,1.3521185133,0.0452422915  
 C,0,2.5728992593,-1.1571735348,0.7796185684  
 O,0,1.4499402613,-0.9608569316,1.6156134856  
 N,0,-0.8610714552,-0.6937285403,-0.2232876782  
 C,0,-1.2175232692,-1.8611495809,-0.8423142481  
 N,0,-2.4450131529,-2.3233812191,-0.6090486207  
 C,0,-2.9607359731,-1.3714882129,0.2375865016  
 C,0,-1.9885596781,-0.3692648471,0.4703016283  
 N,0,-2.1382947077,0.7329054781,1.2788558657  
 C,0,-3.3043366113,0.810369798,1.8353438589  
 N,0,-4.3134313437,-0.1092113699,1.6647862682

C,0,-4.2501721752,-1.2920675882,0.8647295183  
 O,0,-5.2344929066,-2.0337377096,0.8242077605  
 O,0,3.5278596872,-2.1687878643,-0.4630414185  
 O,0,0.7843765043,2.9133288566,-0.9628682961  
 H,0,2.5806272017,-2.1722626548,0.3422838635  
 H,0,3.4615203793,-1.0726866438,1.4196164237  
 H,0,3.632688942,-0.2768581663,-0.9096248118  
 H,0,-3.5396746235,1.6466028286,2.4927836408  
 H,0,2.551587957,1.4395211937,1.139139227  
 H,0,0.3934937242,1.5291766852,0.4377455271  
 H,0,1.3034518844,3.0713830706,-1.8609522911  
 H,0,3.5946461853,1.9776758081,-1.4822586895  
 H,0,-5.2001166789,0.0207640291,2.1360481077  
 H,0,0.648901279,-0.9360065203,1.0450205167  
 H,0,-0.5170019124,-2.3684240353,-1.4977931966  
 O,0,1.3729181708,0.9602985867,-4.1471467483  
 P,0,2.4663629556,1.9588719414,-3.7734309145  
 O,0,3.3145173292,2.3422936728,-5.1943209649  
 O,0,1.9467823925,3.3000967339,-3.2004036584  
 O,0,3.6208518784,1.3770528538,-2.8854554806  
 H,0,0.1005730045,0.5032677763,-2.2180626925  
 H,0,4.221393887,2.1629392415,-4.9010315035

### LG 2.3 Nuc 3.1

grid1lg23.7

E(RB+HF-LYP) = -1626.32466505

|                                              |          |
|----------------------------------------------|----------|
| Zero-point correction=                       | 0.260999 |
| (Hartree/Particle)                           |          |
| Thermal correction to Energy=                | 0.282003 |
| Thermal correction to Enthalpy=              | 0.282947 |
| Thermal correction to Gibbs Free Energy=     | 0.208846 |
| Sum of electronic and zero-point Energies=   | -        |
| 1626.063666                                  |          |
| Sum of electronic and thermal Energies=      | -        |
| 1626.042662                                  |          |
| Sum of electronic and thermal Enthalpies=    | -        |
| 1626.041718                                  |          |
| Sum of electronic and thermal Free Energies= | -        |
| 1626.115819                                  |          |

|       | E (Thermal)<br>KCal/Mol | CV<br>Cal/Mol-Kelvin | S<br>Cal/Mol-Kelvin |
|-------|-------------------------|----------------------|---------------------|
| Total | 176.960                 | 79.354               | 155.960             |

C,0,1.0385084544,1.6618575925,-0.4383355904  
 C,0,0.7526894845,0.4781903969,-1.346990623  
 O,0,1.6491525956,-0.4390709297,-1.3373910165  
 C,0,2.7108371277,-0.1443322426,-0.3410697406  
 C,0,2.5337118097,1.3492106026,0.040430238  
 C,0,2.5723384905,-1.159440755,0.784851259  
 O,0,1.4465688936,-0.9645921191,1.6173607186  
 N,0,-0.8661370654,-0.7056551546,-0.2209757038  
 C,0,-1.2277610814,-1.877717558,-0.828169265  
 N,0,-2.4549592252,-2.3348482131,-0.5847905906  
 C,0,-2.9644949814,-1.3743133009,0.2558915574  
 C,0,-1.9896552591,-0.3719988135,0.4751156161  
 N,0,-2.1332198616,0.7375177066,1.2743171337  
 C,0,-3.2965063179,0.8223857964,1.8355118126  
 N,0,-4.3081036349,-0.0966632303,1.6780663907  
 C,0,-4.2508913345,-1.286864426,0.8885603062  
 O,0,-5.2365873945,-2.0268941044,0.8587561885  
 O,0,3.5206310262,2.1630322447,-0.4790249132  
 O,0,0.7726437039,2.8950620371,-0.979853302  
 H,0,2.5852506397,-2.1763610924,0.3519704832  
 H,0,3.4589235832,-1.0690109741,1.4268094068  
 H,0,3.6338089821,-0.2841601094,-0.9064393705  
 H,0,-3.5269817267,1.6650748325,2.4863207707  
 H,0,2.5518854831,1.4414486875,1.1341460952

H,0,0.3926226941,1.5242895077,0.4385777014  
 H,0,1.2820929644,3.0478906558,-1.8927188802  
 H,0,3.566751618,1.9624350843,-1.5032085876  
 H,0,-5.1923485797,0.0395808732,2.1521632586  
 H,0,0.6460348139,-0.9474280926,1.0461168256  
 H,0,-0.5312791684,-2.3927807346,-1.4819654665  
 O,0,1.4157386799,0.9749813044,-4.3342239563  
 P,0,2.4590300388,1.9605844034,-3.8266059828  
 O,0,3.4153883971,2.4293099013,-5.1522926504  
 O,0,1.8883101821,3.269830031,-3.2229605698  
 O,0,3.5540692884,1.3510958558,-2.8788511506  
 H,0,0.096509899,0.4847621174,-2.2115011542  
 H,0,4.2976712508,2.2582598389,-4.7879310883

### LG 2.5 Nuc 1.9

grid1lg25.1

E(RB+HF-LYP) = -1626.35492381

|                                              |          |
|----------------------------------------------|----------|
| Zero-point correction=                       | 0.265045 |
| (Hartree/Particle)                           |          |
| Thermal correction to Energy=                | 0.286514 |
| Thermal correction to Enthalpy=              | 0.287458 |
| Thermal correction to Gibbs Free Energy=     | 0.212424 |
| Sum of electronic and zero-point Energies=   | -        |
| 1626.089878                                  |          |
| Sum of electronic and thermal Energies=      | -        |
| 1626.068410                                  |          |
| Sum of electronic and thermal Enthalpies=    | -        |
| 1626.067466                                  |          |
| Sum of electronic and thermal Free Energies= | -        |
| 1626.142500                                  |          |

|       | E (Thermal)<br>KCal/Mol | CV<br>Cal/Mol-Kelvin | S<br>Cal/Mol-Kelvin |
|-------|-------------------------|----------------------|---------------------|
| Total | 179.790                 | 81.007               | 157.922             |

C,0,1.1040094688,1.7019679658,-0.4992341765  
 C,0,0.8317494443,0.6115313069,-1.5397884845  
 O,0,1.5995587982,-0.4498079365,-1.3328005197  
 C,0,2.6999443167,-0.1550603173,-0.4101010452  
 C,0,2.5288084244,1.30940012,0.0629461707  
 C,0,2.6279384593,-1.2041694223,0.6926961161  
 O,0,1.5233025312,-1.0516825969,1.5567095536  
 N,0,-0.7974862609,-0.6665506719,-0.1390414684  
 C,0,-1.1292754654,-1.7940736724,-0.838700719  
 N,0,-2.3851592798,-2.2426725771,-0.7456989462  
 C,0,-2.9513801691,-1.3315986147,0.1106130689  
 C,0,-1.9702779706,-0.3743971092,0.4844220531  
 N,0,-2.168625929,0.6837770944,1.3451972901  
 C,0,-3.3748830345,0.7598962239,1.8070986945  
 N,0,-4.3888496976,-0.1185169075,1.4952983293  
 C,0,-4.2858220518,-1.2508810933,0.628348515  
 O,0,-5.2867016722,-1.9561701692,0.459663698  
 O,0,3.6017463944,2.1397846847,-0.2870054547  
 O,0,0.891278812,3.027993388,-0.854696548  
 H,0,2.6425291399,-2.2059719362,0.2227282148  
 H,0,3.5351770723,-1.1204391075,1.3085611872  
 H,0,3.6227559121,-0.2526099392,-0.9888797165  
 H,0,-3.6473800495,1.5607139839,2.4947946209  
 H,0,2.4693215988,1.3308982211,1.1561811107  
 H,0,0.3845254748,1.4778228368,0.297195699  
 H,0,1.4495693632,3.2765788259,-1.6448020689  
 H,0,3.7916540783,2.0055107313,-1.2626246885  
 H,0,-5.3094888091,0.0076525465,1.8970367845  
 H,0,0.7177246911,-0.9360697429,0.9930363296  
 H,0,-0.3858952882,-2.2865179984,-1.4579972401  
 O,0,1.3251875922,1.2506746536,-3.2596755778  
 P,0,2.6166383147,2.1611381164,-3.4723773771  
 O,0,2.8390415054,2.0692551735,-5.1315673007

O,0,2.3364660526,3.6119575653,-3.1194395125  
 O,0,3.8747328324,1.5151455594,-2.8687797755  
 H,0,-0.1428165498,0.4188431762,-1.9419592591  
 H,0,3.4726264215,1.3413152587,-5.2276913969

## LG 2.5 Nuc 2.1

grid1lg25.2

E(RB+HF-LYP) = -1626.34551380

Zero-point correction= 0.264311  
 (Hartree/Particle)  
 Thermal correction to Energy= 0.285819  
 Thermal correction to Enthalpy= 0.286763  
 Thermal correction to Gibbs Free Energy= 0.211895  
 Sum of electronic and zero-point Energies= -  
 1626.081203  
 Sum of electronic and thermal Energies= -  
 1626.059695  
 Sum of electronic and thermal Enthalpies= -  
 1626.058750  
 Sum of electronic and thermal Free Energies= -  
 1626.133619

|       | E (Thermal)<br>KCal/Mol | CV<br>Cal/Mol-Kelvin | S<br>Cal/Mol-Kelvin |
|-------|-------------------------|----------------------|---------------------|
| Total | 179.354                 | 81.124               | 157.573             |

C,0,1.0722896462,1.6824084763,-0.5210485944  
 C,0,0.8019471605,0.5555964679,-1.5141761505  
 O,0,1.5896416289,-0.4702273201,-1.337462835  
 C,0,2.6957203058,-0.1553408551,-0.4132805772  
 C,0,2.5066635408,1.3119271256,0.043727249  
 C,0,2.6345284456,-1.200454754,0.6932153436  
 O,0,1.5360913045,-1.0530873657,1.5652934942  
 N,0,-0.8175745313,-0.7207194879,-0.1006117238  
 C,0,-1.1717857892,-1.8398666486,-0.8027017115  
 N,0,-2.4355675665,-2.262690702,-0.7071144337  
 C,0,-2.9823923038,-1.3398011056,0.149679097  
 C,0,-1.9837407373,-0.4023220125,0.5227550575  
 N,0,-2.1592595988,0.6607755559,1.3815343696  
 C,0,-3.3639175918,0.7623492006,1.8430903058  
 N,0,-4.3948135422,-0.0965946984,1.5337096413  
 C,0,-4.315132236,-1.2319006495,0.6682501719  
 O,0,-5.3288147585,-1.9177472557,0.5005265315  
 O,0,3.5660452149,2.1484567843,-0.3122285316  
 O,0,0.8410108538,2.9888925982,-0.915233574  
 H,0,2.6555848422,-2.2043292574,0.2283780679  
 H,0,3.545496615,-1.104870986,1.3011746402  
 H,0,3.6081963477,-0.2485670337,-1.0073220548  
 H,0,-3.6201477908,1.5703434886,2.528377529  
 H,0,2.4427805801,1.3386964658,1.1368845877  
 H,0,0.3586276046,1.4694843153,0.2863546696  
 H,0,1.4122832412,3.2344011137,-1.7073368538  
 H,0,3.7546720121,2.01862666,-1.2957516151  
 H,0,-5.3129359933,0.0499395288,1.9343635928  
 H,0,0.719033872,-0.963266631,1.0133525568  
 H,0,-0.4398184767,-2.3471749619,-1.4238797979  
 O,0,1.368022589,1.2172864225,-3.4251242658  
 P,0,2.62780252,2.1575233271,-3.5191516794  
 O,0,3.0059403689,2.1623157625,-5.1590535254  
 O,0,2.3032909318,3.5898841218,-3.1066744546  
 O,0,3.8806221866,1.5328716385,-2.8624997637  
 H,0,-0.1241862283,0.385277291,-2.0282454719  
 H,0,3.7860398021,1.5865730007,-5.1821031312

## LG 2.5 Nuc 2.3

grid1lg25.3

E(RB+HF-LYP) = -1626.33864873

Zero-point correction= 0.263467  
 (Hartree/Particle)  
 Thermal correction to Energy= 0.285041  
 Thermal correction to Enthalpy= 0.285986  
 Thermal correction to Gibbs Free Energy= 0.211026  
 Sum of electronic and zero-point Energies= -  
 1626.075181  
 Sum of electronic and thermal Energies= -  
 1626.053607  
 Sum of electronic and thermal Enthalpies= -  
 1626.052663  
 Sum of electronic and thermal Free Energies= -  
 1626.127623

|       | E (Thermal)<br>KCal/Mol | CV<br>Cal/Mol-Kelvin | S<br>Cal/Mol-Kelvin |
|-------|-------------------------|----------------------|---------------------|
| Total | 178.866                 | 81.265               | 157.767             |

C,0,1.0667759557,1.6742883735,-0.519625546  
 C,0,0.788763994,0.5266550206,-1.4791724056  
 O,0,1.5974184076,-0.4713066246,-1.3414016513  
 C,0,2.7023029348,-0.1545997752,-0.4050659184  
 C,0,2.5129502842,1.3182817844,0.0340789768  
 C,0,2.626426141,-1.1930034483,0.7063539378  
 O,0,1.5279963155,-1.0302482879,1.5752537299  
 N,0,-0.8387067115,-0.7601141479,-0.0843385661  
 C,0,-1.2079520896,-1.8748358831,-0.7856957238  
 N,0,-2.4754451798,-2.2823446928,-0.6829027077  
 C,0,-3.0077545102,-1.3515835859,0.1749848316  
 C,0,-1.9985945169,-0.424372019,0.5419715685  
 N,0,-2.1575321358,0.6430857056,1.3977862815  
 C,0,-3.3595031655,0.7601987917,1.8630563517  
 N,0,-4.4007986987,-0.0881380546,1.5605793027  
 C,0,-4.3373764394,-1.2274420496,0.698976809  
 O,0,-5.3583823484,-1.9028202288,0.537321355  
 O,0,3.5597647586,2.1519107924,-0.3472140751  
 O,0,0.8226039708,2.9648992694,-0.9438183325  
 H,0,2.641116597,-2.1998695511,0.2484829132  
 H,0,3.5362153158,-1.100311271,1.3159872377  
 H,0,3.6112358012,-0.2576006783,-1.0019410862  
 H,0,-3.603895701,1.5737584324,2.5458568558  
 H,0,2.4586501114,1.3560101438,1.1277887897  
 H,0,0.3638504913,1.4707284974,0.3018654994  
 H,0,1.3958372302,3.2021366187,-1.7503552375  
 H,0,3.7293362856,2.0184386929,-1.3411052747  
 H,0,-5.3158182652,0.0706723678,1.9637140271  
 H,0,0.7074737586,-0.9668913002,1.0250523498  
 H,0,-0.4850268921,-2.3910781787,-1.4102401558  
 O,0,1.3928095202,1.1750313149,-3.6016084858  
 P,0,2.6198692232,2.1353695338,-3.5732293047  
 O,0,3.132565086,2.2525215259,-5.1774360893  
 O,0,2.2552149027,3.5452750997,-3.0975581412  
 O,0,3.8580101032,1.5186235763,-2.8668495713  
 H,0,-0.0839375439,0.3896664104,-2.0887464119  
 H,0,3.9857814797,1.793675445,-5.1311399721

## LG 2.5 Nuc 2.5

grid1lg25.4

E(RB+HF-LYP) = -1626.33397018

Zero-point correction= 0.262594  
 (Hartree/Particle)  
 Thermal correction to Energy= 0.284237  
 Thermal correction to Enthalpy= 0.285182  
 Thermal correction to Gibbs Free Energy= 0.210008  
 Sum of electronic and zero-point Energies= -  
 1626.071376  
 Sum of electronic and thermal Energies= -  
 1626.049733

Sum of electronic and thermal Enthalpies= -  
1626.048789  
Sum of electronic and thermal Free Energies= -  
1626.123962

|       | E (Thermal)<br>KCal/Mol | CV<br>Cal/Mol-Kelvin | S<br>Cal/Mol-Kelvin |
|-------|-------------------------|----------------------|---------------------|
| Total | 178.362                 | 81.375               | 158.217             |

C,0,1.0632625742,1.6669455715,-0.5044944034  
C,0,0.7845482264,0.5091845678,-1.4455139561  
O,0,1.615839955,-0.4633546408,-1.3480557713  
C,0,2.7116861015,-0.1522849589,-0.3915541394  
C,0,2.5229467657,1.3253081068,0.0340017177  
C,0,2.6158248067,-1.1876734814,0.721010932  
O,0,1.5160390304,-0.10117397809,1.5853322977  
N,0,-0.853737865,-0.7949368529,-0.079760217  
C,0,-1.2380543814,-1.9062810316,-0.7783530023  
N,0,-2.5085879823,-2.2993333819,-0.6660723838  
C,0,-3.0260872393,-1.3599702837,0.1920261267  
C,0,-2.0067135378,-0.4419491549,0.5504943395  
N,0,-2.1488768725,0.6303173569,1.4024419835  
C,0,-3.3474057376,0.7625407239,1.8728695548  
N,0,-4.3987021757,-0.0761793309,1.5795507928  
C,0,-4.351695332,-1.2202328696,0.7231397618  
O,0,-5.379579885,-1.8862225246,0.5699467941  
O,0,3.5545845391,2.1570710233,-0.3769981331  
O,0,0.8066268285,2.941836892,-0.9573203739  
H,0,2.623421814,-2.1957230396,0.2660890794  
H,0,3.523597709,-1.1022618328,1.3343745161  
H,0,3.6220272477,-0.2645342313,-0.9840147437  
H,0,-3.5795960517,1.5820397317,2.5526198406  
H,0,2.4823919257,1.3733548173,1.1282747485  
H,0,0.3737226414,1.4700710385,0.3310779962  
H,0,1.3743737305,3.1657964907,-1.7872529624  
H,0,3.6995297877,2.0153981752,-1.3813602577  
H,0,-5.3099952321,0.094391658,1.9863692183  
H,0,0.6936176946,-0.9723211962,1.0360875513  
H,0,-0.5244971714,-2.4313453325,-1.4063385109  
O,0,1.4144475505,1.1209721946,-3.7862274731  
P,0,2.5979404715,2.1017834549,-3.6309858159  
O,0,3.2357263281,2.3295393141,-5.1820274674  
O,0,2.1784805032,3.484700165,-3.1032229117  
O,0,3.8169574157,1.4991019735,-2.8685851055  
H,0,-0.0265265116,0.4113929232,-2.1451667076  
H,0,4.1347067984,1.9892653654,-5.052736755

## LG 2.5 Nuc 2.7

grid1lg25.5

E(RB+HF-LYP) = -1626.33086393

|                                              |          |
|----------------------------------------------|----------|
| Zero-point correction=                       | 0.261738 |
| (Hartree/Particle)                           |          |
| Thermal correction to Energy=                | 0.283516 |
| Thermal correction to Enthalpy=              | 0.284460 |
| Thermal correction to Gibbs Free Energy=     | 0.208564 |
| Sum of electronic and zero-point Energies=   | -        |
| 1626.069126                                  |          |
| Sum of electronic and thermal Energies=      | -        |
| 1626.047348                                  |          |
| Sum of electronic and thermal Enthalpies=    | -        |
| 1626.046404                                  |          |
| Sum of electronic and thermal Free Energies= | -        |
| 1626.122300                                  |          |

|       | E (Thermal)<br>KCal/Mol | CV<br>Cal/Mol-Kelvin | S<br>Cal/Mol-Kelvin |
|-------|-------------------------|----------------------|---------------------|
| Total | 177.909                 | 81.461               | 159.738             |

C,0,1.0603831781,1.6717022442,-0.4896324566  
C,0,0.7861201747,0.5120982057,-1.4244297096  
O,0,1.6340260287,-0.4418731339,-1.3579126571  
C,0,2.7153995383,-0.1436531502,-0.3766701525  
C,0,2.5288375044,1.3373319781,0.0395002554  
C,0,2.5951336362,-1.1791569873,0.7332999275  
O,0,1.4904526395,-0.992835733,1.5889918581  
N,0,-0.8684035258,-0.8082767682,-0.0943318518  
C,0,-1.2635936856,-1.9171595413,-0.791042359  
N,0,-2.5330234963,-2.3067360235,-0.6619614355  
C,0,-3.0374306475,-1.3665016185,0.2033615663  
C,0,-2.0129723345,-0.4503738963,0.5490842793  
N,0,-2.1411668714,0.6213943714,1.403301689  
C,0,-3.3331725401,0.7553850238,1.8897786511  
N,0,-4.3893163399,-0.0816182919,1.6103033073  
C,0,-4.3555270781,-1.2256667228,0.7532625622  
O,0,-5.3854546645,-1.8909931246,0.6144103893  
O,0,3.5482853754,2.1651196828,-0.3984884508  
O,0,0.8030851718,2.9345112219,-0.9686399277  
H,0,2.5972192737,-2.1868424349,0.2779683609  
H,0,3.4982731516,-1.1034983293,1.3545319902  
H,0,3.6306089316,-0.2643658881,-0.9593840141  
H,0,-3.5547105355,1.5749561314,2.5728497263  
H,0,2.4995001909,1.3948574664,1.1340050237  
H,0,0.3775094868,1.4849310031,0.353539899  
H,0,1.3616408807,3.1365042948,-1.8246435557  
H,0,3.6690871454,2.0068537063,-1.4107002844  
H,0,-5.2945289774,0.0895887551,2.0302636197  
H,0,0.6704183985,-0.9691486692,1.0359595538  
H,0,-0.5594285052,-2.4429915084,-1.4288006504  
O,0,1.4392466831,1.0754848578,-3.9829488083  
P,0,2.5810531468,2.0589883636,-3.6901545945  
O,0,3.3485447266,2.3829996854,-5.1662414035  
O,0,2.1115822498,3.4173012085,-3.1262110926  
O,0,3.7572813135,1.4522918452,-2.8571373614  
H,0,0.0329197396,0.4521543565,-2.1952194128  
H,0,4.2543651064,2.119050394,-4.950360352

## LG 2.5 Nuc 2.9

grid1lg25.6

E(RB+HF-LYP) = -1626.32858267

|                                              |          |
|----------------------------------------------|----------|
| Zero-point correction=                       | 0.261070 |
| (Hartree/Particle)                           |          |
| Thermal correction to Energy=                | 0.282976 |
| Thermal correction to Enthalpy=              | 0.283920 |
| Thermal correction to Gibbs Free Energy=     | 0.207188 |
| Sum of electronic and zero-point Energies=   | -        |
| 1626.067513                                  |          |
| Sum of electronic and thermal Energies=      | -        |
| 1626.045606                                  |          |
| Sum of electronic and thermal Enthalpies=    | -        |
| 1626.044662                                  |          |
| Sum of electronic and thermal Free Energies= | -        |
| 1626.121394                                  |          |

|       | E (Thermal)<br>KCal/Mol | CV<br>Cal/Mol-Kelvin | S<br>Cal/Mol-Kelvin |
|-------|-------------------------|----------------------|---------------------|
| Total | 177.570                 | 81.484               | 161.496             |

C,0,1.0717033177,1.6786310163,-0.4697198634  
C,0,0.7995285843,0.5221092757,-1.4039060156  
O,0,1.6549497734,-0.4227218063,-1.3585089523  
C,0,2.7233989634,-0.140039328,-0.3571085057  
C,0,2.5476636549,1.3461332428,0.0468886341  
C,0,2.5730529475,-1.1714595442,0.7531561952  
O,0,1.4601306475,-0.9686090849,1.5940699861  
N,0,-0.8795584561,-0.8086703254,-0.1156150115  
C,0,-1.2817824174,-1.9141606034,-0.8138766093

N,O,-2.5489822633,-2.3047602827,-0.670620213  
 C,O,-3.0437856561,-1.3683845248,0.2046114813  
 C,O,-2.0170530608,-0.4523151516,0.5416413157  
 N,O,-2.1353707555,0.6154958501,1.4018508389  
 C,O,-3.3213416769,0.7456276826,1.904002027  
 N,O,-4.3795119442,-0.091865036,1.6345433367  
 C,O,-4.3549551919,-1.232343464,0.7724897469  
 O,O,-5.3849615763,-1.8992674439,0.6444214992  
 O,O,3.557402436,2.1640045495,-0.4235700237  
 O,O,0.8160576184,2.9337369279,-0.9643107766  
 H,O,2.5684802128,-2.180119316,0.3004260915  
 H,O,3.4687873538,-1.1060531005,1.3861515028  
 H,O,3.6438907625,-0.2761144084,-0.9275326972  
 H,O,-3.5352143748,1.5619124866,2.5933403643  
 H,O,2.5342386147,1.4172180204,1.1411865284  
 H,O,0.3962914103,1.4978463617,0.3805866575  
 H,O,1.3519287069,3.1109535924,-1.8516649781  
 H,O,3.6414411481,1.9893409119,-1.4428186642  
 H,O,-5.2793490323,0.0757368097,2.0673427668  
 H,O,0.6458826179,-0.9575655279,1.0326525292  
 H,O,-0.5850603695,-2.4364448978,-1.4625195833  
 O,O,1.4544268166,1.0410047806,-4.1809289476  
 P,O,2.5493734209,2.0180626851,-3.754265909  
 O,O,3.4344458092,2.4274397946,-5.1425831174  
 O,O,2.030407981,3.3508322202,-3.1613295758  
 O,O,3.6712707352,1.3969587875,-2.8525712799  
 H,O,0.0835326492,0.4898419377,-2.2150387025  
 H,O,4.3308850625,2.2126745324,-4.8412059158

### LG 2.5 Nuc 3.1

grid1lg25.7

E(RB+HF-LYP) = -1626.32673925

Zero-point correction= 0.260566  
 (Hartree/Particle)  
 Thermal correction to Energy= 0.282576  
 Thermal correction to Enthalpy= 0.283520  
 Thermal correction to Gibbs Free Energy= 0.205618  
 Sum of electronic and zero-point Energies= -  
 1626.066173  
 Sum of electronic and thermal Energies= -  
 1626.044164  
 Sum of electronic and thermal Enthalpies= -  
 1626.043219  
 Sum of electronic and thermal Free Energies= -  
 1626.121122

|       | E (Thermal)<br>KCal/Mol | CV<br>Cal/Mol-Kelvin | S<br>Cal/Mol-Kelvin |
|-------|-------------------------|----------------------|---------------------|
| Total | 177.319                 | 81.444               | 163.959             |

C,O,1.0762410262,1.6750502327,-0.4590881206  
 C,O,0.8083861709,0.5221457808,-1.3943231852  
 O,O,1.6656515589,-0.4193688277,-1.3608519921  
 C,O,2.7270025767,-0.1454151023,-0.3482319073  
 C,O,2.5581291694,1.3444929623,0.0484535673  
 C,O,2.5579742237,-1.1733237147,0.7625510013  
 O,O,1.4392551824,-0.9599118364,1.5931843361  
 N,O,-0.8923279782,-0.8097571988,-0.1359098432  
 C,O,-1.3003681977,-1.9228308396,-0.8186544706  
 N,O,-2.5640648811,-2.315576583,-0.6538341496  
 C,O,-3.0497423549,-1.3722760559,0.2192354086  
 C,O,-2.0219260185,-0.4498473605,0.5334041065  
 N,O,-2.1313655463,0.6256037843,1.3849353682  
 C,O,-3.3106327966,0.7569537821,1.9023360333  
 N,O,-4.3696927895,-0.0862475672,1.6554789621  
 C,O,-4.3535265662,-1.2347125624,0.8039149804  
 O,O,-5.3828174791,-1.9060370231,0.696280195  
 O,O,3.5595744892,2.156747283,-0.442625657

O,O,0.8199208766,2.9246974782,-0.9616128578  
 H,O,2.5499482403,-2.1831571484,0.3128322141  
 H,O,3.4484506471,-1.112831081,1.4033203189  
 H,O,3.6505663167,-0.291397964,-0.9110393936  
 H,O,-3.5173442738,1.5790636867,2.5868530544  
 H,O,2.5549612344,1.4230162754,1.1426028046  
 H,O,0.4066063877,1.4944792179,0.3956844906  
 H,O,1.3279495901,3.0760052199,-1.8791504926  
 H,O,3.6169891423,1.9760768894,-1.4687493735  
 H,O,-5.263969588,0.0828265209,2.0991167598  
 H,O,0.629154432,-0.9537673453,1.0264189932  
 H,O,-0.6111078016,-2.4491663103,-1.4719564472  
 O,O,1.5266295565,0.9985655586,-4.3720988962  
 P,O,2.5392723814,1.9887842983,-3.8138382325  
 O,O,3.5181118027,2.5043645356,-5.1020103797  
 O,O,1.9317242727,3.2773827514,-3.1988613744  
 O,O,3.6158466376,1.3741878253,-2.8497726758  
 H,O,0.1068817495,0.5032330362,-2.2208277778  
 H,O,4.3959030766,2.3666150217,-4.7134992079

### LG 2.7 Nuc 1.9

grid1lg27.1

E(RB+HF-LYP) = -1626.36424458

Zero-point correction= 0.264921  
 (Hartree/Particle)  
 Thermal correction to Energy= 0.286396  
 Thermal correction to Enthalpy= 0.287340  
 Thermal correction to Gibbs Free Energy= 0.212372  
 Sum of electronic and zero-point Energies= -  
 1626.099324  
 Sum of electronic and thermal Energies= -  
 1626.077849  
 Sum of electronic and thermal Enthalpies= -  
 1626.076905  
 Sum of electronic and thermal Free Energies= -  
 1626.151872

|       | E (Thermal)<br>KCal/Mol | CV<br>Cal/Mol-Kelvin | S<br>Cal/Mol-Kelvin |
|-------|-------------------------|----------------------|---------------------|
| Total | 179.716                 | 80.930               | 157.783             |

C,O,1.1932493418,1.7656900202,-0.5527332251  
 C,O,0.8966431602,0.6739119345,-1.5813234081  
 O,O,1.6142428468,-0.412421751,-1.3308783063  
 C,O,2.7170675279,-0.1383766368,-0.4023609236  
 C,O,2.6033214782,1.3454926175,0.0226096558  
 C,O,2.5834269368,-1.1486553947,0.731613301  
 O,O,1.4865407494,-0.9139292603,1.5835762227  
 N,O,-0.8687106759,-0.6817576086,-0.0530293918  
 C,O,-1.189619207,-1.7715462869,-0.8119103917  
 N,O,-2.4479910899,-2.2214283651,-0.7591293039  
 C,O,-3.0255798569,-1.3503807299,0.1301518348  
 C,O,-2.0492460453,-0.4129780442,0.5635523909  
 N,O,-2.2607393602,0.6063742926,1.4674173645  
 C,O,-3.4741005653,0.6619301525,1.9136044865  
 N,O,-4.4832698273,-0.2011754059,1.5476902106  
 C,O,-4.3673077593,-1.292830518,0.6317287261  
 O,O,-5.3657667819,-1.9888870068,0.4162977489  
 O,O,3.7038006975,2.1248829206,-0.3572234311  
 O,O,1.0060861372,3.0928950588,-0.9154822402  
 H,O,2.551768906,-2.1634917323,0.2912580285  
 H,O,3.4917426206,-1.0909675145,1.3492694678  
 H,O,3.6416029968,-0.2962350622,-0.9649891196  
 H,O,-3.7577294322,1.431533682,2.6319389337  
 H,O,2.5461738314,1.4062257837,1.114362284  
 H,O,0.4639421353,1.5507817323,0.2404564309  
 H,O,1.5682305452,3.3184336382,-1.7103308305  
 H,O,3.8800137923,1.9598728594,-1.3307075363



H,0,-5.4096514849,-0.0934334989,1.9415163955  
H,0,0.6733346169,-0.835400623,1.0200556759  
H,0,-0.4369488029,-2.2372440306,-1.4405962166  
O,0,1.373948323,1.2509962512,-3.3275055314  
P,0,2.6947433691,2.1257811206,-3.5363865976  
O,0,2.913206798,2.0205974329,-5.1937593344  
O,0,2.4536191541,3.5845294148,-3.1893430491  
O,0,3.9284170932,1.4431834601,-2.9261326684  
H,0,-0.1020986675,0.4859134628,-1.9338831909  
H,0,3.5158809684,1.266781255,-5.2897283014

### LG 2.7 Nuc 2.1

grid1lg27.2

E(RB+HF-LYP) = -1626.35291706

Zero-point correction= 0.264082  
(Hartree/Particle)  
Thermal correction to Energy= 0.285625  
Thermal correction to Enthalpy= 0.286569  
Thermal correction to Gibbs Free Energy= 0.211431  
Sum of electronic and zero-point Energies= -  
1626.088835  
Sum of electronic and thermal Energies= -  
1626.067292  
Sum of electronic and thermal Enthalpies= -  
1626.066348  
Sum of electronic and thermal Free Energies= -  
1626.141486

|       | E (Thermal)<br>KCal/Mol | CV<br>Cal/Mol-Kelvin | S<br>Cal/Mol-Kelvin |
|-------|-------------------------|----------------------|---------------------|
| Total | 179.232                 | 81.089               | 158.141             |

C,0,1.1581783116,1.7447786428,-0.5703810639  
C,0,0.8623750926,0.6211828821,-1.5538701206  
O,0,1.5954059162,-0.4347317823,-1.3313647557  
C,0,2.7098771376,-0.1415989717,-0.4073001371  
C,0,2.5776027834,1.3440013927,0.006982093  
C,0,2.5937802295,-1.1516807532,0.7279992836  
O,0,1.5056026747,-0.9243595628,1.5921822084  
N,0,-0.8784273283,-0.745447695,-0.0072851898  
C,0,-1.2217075104,-1.8310380186,-0.7626757486  
N,0,-2.4899580162,-2.2504989902,-0.7110324728  
C,0,-3.0498031592,-1.3606561194,0.1711742651  
C,0,-2.0544395735,-0.4440404631,0.6029893527  
N,0,-2.2445835092,0.5869283995,1.4977908675  
C,0,-3.4587907868,0.6760269706,1.936552233  
N,0,-4.4864255387,-0.1653511357,1.5722629267  
C,0,-4.3926189138,-1.2666874894,0.6653714617  
O,0,-5.4056464554,-1.9403097756,0.4497448454  
O,0,3.6654214973,2.131505784,-0.374052346  
O,0,0.9528479529,3.0545162325,-0.9647592189  
H,0,2.5670260077,-2.1675289919,0.2902950536  
H,0,3.5087478941,-1.0836818733,1.3340003442  
H,0,3.6218101428,-0.2914183228,-0.9906295818  
H,0,-3.7272614313,1.4586029425,2.6464178187  
H,0,2.5146670155,1.4054038453,1.0985387151  
H,0,0.433926205,1.5364136719,0.2326434319  
H,0,1.5232078139,3.2777355312,-1.7655654063  
H,0,3.8398355544,1.9783900158,-1.3560185278  
H,0,-5.4123717379,-0.0304580971,1.9587398898  
H,0,0.679793791,-0.870651016,1.0435090137  
H,0,-0.4792364843,-2.3178843308,-1.3877569409  
O,0,1.4165184402,1.2145279385,-3.4905850394  
P,0,2.7001662027,2.128329085,-3.5801063556  
O,0,3.0716638225,2.1240946304,-5.2198003634  
O,0,2.4064901683,3.5678876944,-3.1710853194  
O,0,3.9329598724,1.4720870892,-2.9209207526  
H,0,-0.0936709159,0.452981076,-2.0174233051

H,0,3.8192813047,1.5072971845,-5.2549149983

### LG 2.7 Nuc 2.3

grid1lg27.3

E(RB+HF-LYP) = -1626.34436004

Zero-point correction= 0.263214  
(Hartree/Particle)  
Thermal correction to Energy= 0.284840  
Thermal correction to Enthalpy= 0.285784  
Thermal correction to Gibbs Free Energy= 0.210378  
Sum of electronic and zero-point Energies= -  
1626.081146  
Sum of electronic and thermal Energies= -  
1626.059520  
Sum of electronic and thermal Enthalpies= -  
1626.058576  
Sum of electronic and thermal Free Energies= -  
1626.133982

|       | E (Thermal)<br>KCal/Mol | CV<br>Cal/Mol-Kelvin | S<br>Cal/Mol-Kelvin |
|-------|-------------------------|----------------------|---------------------|
| Total | 178.740                 | 81.265               | 158.704             |

C,0,1.1222175192,1.7217694983,-0.5819955531  
C,0,0.8395521087,0.5763448751,-1.5356748071  
O,0,1.5988412287,-0.4488756184,-1.3437832615  
C,0,2.7083100879,-0.1394594079,-0.4058079473  
C,0,2.550606375,1.3462166106,0.000131327  
C,0,2.5976160748,-1.1527001094,0.7265722481  
O,0,1.510688933,-0.9354504467,1.5941547882  
N,0,-0.8872034618,-0.8047697125,0.0137880153  
C,0,-1.2566588251,-1.8882668404,-0.7322367648  
N,0,-2.5330536162,-2.2790940598,-0.6713173103  
C,0,-3.0696701107,-1.3692025229,0.2052217248  
C,0,-2.0539882895,-0.470790007,0.625171678  
N,0,-2.2171170287,0.5732541925,1.5094275103  
C,0,-3.4277888722,0.6945251544,1.9505833797  
N,0,-4.4746145898,-0.1278432972,1.5987042942  
C,0,-4.4086434978,-1.240388855,0.70297277  
O,0,-5.4363578421,-1.8937058918,0.4973618207  
O,0,3.6210253744,2.1475004426,-0.3851038124  
O,0,0.8974694195,3.0148421411,-1.0055772971  
H,0,2.5793727014,-2.167987758,0.2875671126  
H,0,3.5135343439,-1.0775789762,1.3298521687  
H,0,3.6176750545,-0.2786653497,-0.9947215489  
H,0,-3.6762981045,1.4908955287,2.6521070881  
H,0,2.4824672918,1.4087054825,1.0915484064  
H,0,0.4003726639,1.5144263886,0.2258052898  
H,0,1.4773831131,3.2360212744,-1.8131836225  
H,0,3.7919753091,1.9993157086,-1.375351842  
H,0,-5.3963146258,0.0327955909,1.9855379762  
H,0,0.678610316,-0.9044223688,1.0529552981  
H,0,-0.5282230277,-2.3967920614,-1.356891991  
O,0,1.457361027,1.1702905714,-3.6700455176  
P,0,2.6983460804,2.117287531,-3.6241090222  
O,0,3.2252401434,2.2227516408,-5.2225885672  
O,0,2.3441102405,3.5327977035,-3.1591383979  
O,0,3.9155207814,1.4832053928,-2.9008465914  
H,0,-0.0606218388,0.4256750811,-2.1051914935  
H,0,4.0605020134,1.7320400942,-5.1762313882

### LG 2.7 Nuc 2.5

grid1lg27.4

E(RB+HF-LYP) = -1626.33825313

Zero-point correction= 0.262344  
(Hartree/Particle)  
Thermal correction to Energy= 0.284054

Thermal correction to Enthalpy= 0.284998  
 Thermal correction to Gibbs Free Energy= 0.209245  
 Sum of electronic and zero-point Energies= -  
 1626.075909  
 Sum of electronic and thermal Energies= -  
 1626.054200  
 Sum of electronic and thermal Enthalpies= -  
 1626.053255  
 Sum of electronic and thermal Free Energies= -  
 1626.129008

|       | E (Thermal)<br>KCal/Mol | CV<br>Cal/Mol-Kelvin | S<br>Cal/Mol-Kelvin |
|-------|-------------------------|----------------------|---------------------|
| Total | 178.246                 | 81.395               | 159.434             |

C,0,1.1039018665,1.706775519,-0.5741808692  
 C,0,0.826881884,0.5509533685,-1.5093752235  
 O,0,1.6107300406,-0.4496238371,-1.3545067361  
 C,0,2.7123736404,-0.1382742849,-0.3983962415  
 C,0,2.5448695319,1.3492052165,-0.0009144376  
 C,0,2.5937509813,-1.152163773,0.7323975608  
 O,0,1.5073048245,-0.9327484335,1.599377448  
 N,0,-0.8926485982,-0.8539668195,0.0266618079  
 C,0,-1.2819260672,-1.937375222,-0.7094939969  
 N,0,-2.564111684,-2.3055219838,-0.6409824394  
 C,0,-3.0829607601,-1.3778563021,0.2279885093  
 C,0,-2.052232398,-0.4926343471,0.6366853079  
 N,0,-2.1946018667,0.5636257022,1.5093787515  
 C,0,-3.4022893554,0.7111331529,1.9510512701  
 N,0,-4.4633874852,-0.0972805292,1.610714795  
 C,0,-4.4185633234,-1.2210018768,0.7275569433  
 O,0,-5.4570238055,-1.8593254035,0.5315203236  
 O,0,3.5989276672,2.1556244597,-0.4056970438  
 O,0,0.8636686446,2.985143556,-1.0220745765  
 H,0,2.5749830684,-2.1672210789,0.293380426  
 H,0,3.5093046614,-1.0785206854,1.3361366009  
 H,0,3.6214596421,-0.2771858294,-0.9871631374  
 H,0,-3.6355228525,1.5200700649,2.6431977207  
 H,0,2.4836717674,1.4160211495,1.0909270067  
 H,0,0.3919183397,1.4999695464,0.2442358207  
 H,0,1.4407271333,3.1972187546,-1.8495619136  
 H,0,3.7523885113,2.003765192,-1.4056288604  
 H,0,-5.3815311769,0.0842258627,1.9968250153  
 H,0,0.6718545843,-0.9237176398,1.0623947792  
 H,0,-0.5642611835,-2.4639361766,-1.3317798866  
 O,0,1.4842537884,1.1231012812,-3.8525578093  
 P,0,2.6777291239,2.0923911373,-3.6738402984  
 O,0,3.3373477447,2.3116068082,-5.2149853959  
 O,0,2.2641382529,3.4799368994,-3.1555875466  
 O,0,3.8733155406,1.4721072719,-2.8923319431  
 H,0,-0.0159920507,0.4291134899,-2.169072907  
 H,0,4.223795838,1.9410334096,-5.0826326644

## LG 2.7 Nuc 2.7

grid1lg27.5

E(RB+HF-LYP) = -1626.33405525

Zero-point correction= 0.261510  
 (Hartree/Particle)  
 Thermal correction to Energy= 0.283340  
 Thermal correction to Enthalpy= 0.284284  
 Thermal correction to Gibbs Free Energy= 0.207894  
 Sum of electronic and zero-point Energies= -  
 1626.072545  
 Sum of electronic and thermal Energies= -  
 1626.050715  
 Sum of electronic and thermal Enthalpies= -  
 1626.049771

Sum of electronic and thermal Free Energies= -  
 1626.126162

|       | E (Thermal)<br>KCal/Mol | CV<br>Cal/Mol-Kelvin | S<br>Cal/Mol-Kelvin |
|-------|-------------------------|----------------------|---------------------|
| Total | 177.799                 | 81.494               | 160.778             |

C,0,-0.9273135293,0.3023566286,1.1380022001  
 C,0,-0.7344597934,-0.2053262922,-0.2692482298  
 O,0,-0.9627445747,0.652242769,-1.1835492582  
 C,0,-1.4775161717,1.9356016351,-0.6124071375  
 C,0,-1.6923907129,1.6818742983,0.900386151  
 C,0,-0.465412256,3.0123402227,-0.9814664576  
 O,0,0.7365868993,2.9608203751,-0.2524061279  
 N,0,1.8809276873,0.3622484204,-0.6264724249  
 C,0,2.2434484264,-0.092092726,-1.8634105479  
 N,0,3.4405238592,-0.6713497518,-1.9835755038  
 C,0,3.9260192069,-0.5970374924,-0.7012897742  
 C,0,2.9661209088,0.0395611631,0.1261254493  
 N,0,3.1031044383,0.2964785791,1.4722503793  
 C,0,4.2276245839,-0.1133575963,1.26522636412  
 N,0,5.2169263917,-0.7386815666,1.2406881089  
 C,0,5.1777482634,-1.0390104326,-0.1568571934  
 O,0,6.1545436885,-1.5928628925,-0.669377731  
 O,0,-3.0217438028,1.7247804172,1.190725949  
 O,0,-1.4156802449,-0.5767314798,2.0733099824  
 H,0,-0.2911108866,2.9724171808,-2.0728344877  
 H,0,-0.9328589162,3.9834504583,-0.7656611634  
 H,0,-2.4347933728,2.0717701462,-1.1190725943  
 H,0,4.4438099763,0.029234158,3.0238463381  
 H,0,-1.1560944734,2.4520032504,1.4661469995  
 H,0,0.1043818147,0.5715025756,1.4260130134  
 H,0,-2.3488219463,-0.9432793951,1.7848410832  
 H,0,-3.5451548626,1.0917894654,0.6628569826  
 H,0,6.0704274873,-1.0324231357,1.6992624635  
 H,0,1.1528149731,2.070348867,-0.3948511465  
 H,0,1.5672600746,0.0131670886,-2.7067270162  
 O,0,-2.6889721448,-1.9002249467,-1.0420368515  
 P,0,-3.8089879595,-1.275958586,-0.1941783423  
 O,0,-5.2584702832,-2.0018931931,-0.6826321614  
 O,0,-3.6715870811,-1.5381114617,1.320743414  
 O,0,-4.0896789753,0.2282400328,-0.511044464  
 H,0,-0.423191149,-1.1918811749,-0.5790380973  
 H,0,-5.755551895,-1.2193208604,-0.9673369516

## LG 2.7 Nuc 2.9

grid1lg27.6

E(RB+HF-LYP) = -1626.33108791

Zero-point correction= 0.260743  
 (Hartree/Particle)  
 Thermal correction to Energy= 0.282695  
 Thermal correction to Enthalpy= 0.283639  
 Thermal correction to Gibbs Free Energy= 0.206560  
 Sum of electronic and zero-point Energies= -  
 1626.070344  
 Sum of electronic and thermal Energies= -  
 1626.048393  
 Sum of electronic and thermal Enthalpies= -  
 1626.047449  
 Sum of electronic and thermal Free Energies= -  
 1626.124528

|       | E (Thermal)<br>KCal/Mol | CV<br>Cal/Mol-Kelvin | S<br>Cal/Mol-Kelvin |
|-------|-------------------------|----------------------|---------------------|
| Total | 177.394                 | 81.533               | 162.227             |

C,0,-0.9314224827,0.338034724,1.1502156963  
 C,0,-0.7401961952,-0.1729398757,-0.2518292229

O,0,-0.9884482757,0.6666998973,-1.1729186981  
 C,0,-1.47779114,1.9638330697,-0.6073684939  
 C,0,-1.7163922549,1.7078069469,0.9022563729  
 C,0,-0.4399868118,3.0203823105,-0.9649186782  
 O,0,0.75128233,2.948245249,-0.2206179574  
 N,0,1.8797238751,0.3543156671,-0.636561612  
 C,0,2.2464490819,-0.1013547869,-1.8719685886  
 N,0,3.445106452,-0.6775149768,-1.9870306047  
 C,0,3.9263244349,-0.6005378863,-0.7031319507  
 C,0,2.9626542987,0.0339478898,0.1207550359  
 N,0,3.0946788142,0.2940592163,1.4665475168  
 C,0,4.2191464562,-0.111347876,1.9634519771  
 N,0,5.2124151547,-0.7344459001,1.2426491336  
 C,0,5.1783931654,-1.0369529984,-0.1545886223  
 O,0,6.1586338586,-1.5872661592,-0.6638289212  
 O,0,-3.0518091963,1.7171112018,1.2563062751  
 O,0,-1.4169568232,-0.5466611948,2.077869089  
 H,0,-0.2530093354,2.9764705029,-2.0538479636  
 H,0,-0.8928989669,3.999892948,-0.7561978719  
 H,0,-2.4249638377,2.1179208956,-1.1273116277  
 H,0,4.4318148851,0.0338430661,3.0223442152  
 H,0,-1.2048155491,2.4869199789,1.4790545977  
 H,0,0.0949589838,0.6246823235,1.4404217288  
 H,0,-2.3329942897,-0.9582580658,1.7560939546  
 H,0,-3.5360966607,1.052493707,0.6254503754  
 H,0,6.0657089327,-1.0243253959,1.70407808  
 H,0,1.1682880948,2.0607932217,-0.379592833  
 H,0,1.572680544,0.0007321661,-2.7175627279  
 O,0,-2.7627274805,-2.0458929896,-1.152613686  
 P,0,-3.7788571635,-1.349015825,-0.2472086936  
 O,0,-5.3082552039,-1.9720978873,-0.6291043023  
 O,0,-3.5761950454,-1.6006014316,1.2673226142  
 O,0,-3.985241972,0.1750473109,-0.5461443413  
 H,0,-0.4946104025,-1.1815247486,-0.5601337607  
 H,0,-5.7848599215,-1.1498095471,-0.8218500861

### LG 2.7 Nuc 3.1

grid1lg27.7

E(RB+HF-LYP) = -1626.32889260

|                                              |          |
|----------------------------------------------|----------|
| Zero-point correction=                       | 0.260108 |
| (Hartree/Particle)                           |          |
| Thermal correction to Energy=                | 0.282182 |
| Thermal correction to Enthalpy=              | 0.283126 |
| Thermal correction to Gibbs Free Energy=     | 0.204956 |
| Sum of electronic and zero-point Energies=   | -        |
| 1626.068784                                  |          |
| Sum of electronic and thermal Energies=      | -        |
| 1626.046711                                  |          |
| Sum of electronic and thermal Enthalpies=    | -        |
| 1626.045767                                  |          |
| Sum of electronic and thermal Free Energies= | -        |
| 1626.123937                                  |          |

|       | E (Thermal) | CV             | S              |
|-------|-------------|----------------|----------------|
|       | KCal/Mol    | Cal/Mol-Kelvin | Cal/Mol-Kelvin |
| Total | 177.072     | 81.513         | 164.524        |

C,0,-0.9328645498,0.3770384204,1.1454968034  
 C,0,-0.7498048817,-0.1371522649,-0.2528050676  
 O,0,-0.9976180613,0.6957500698,-1.1785742831  
 C,0,-1.4732207502,1.999145049,-0.6151859008  
 C,0,-1.7346735935,1.737375586,0.8905136944  
 C,0,-0.4164912989,3.0423132934,-0.9568930407  
 O,0,0.7655557702,2.9471163627,-0.2010763922  
 N,0,1.8754204474,0.3523732683,-0.6509847508  
 C,0,2.255529065,-0.0950775615,-1.8855143211  
 N,0,3.4558794595,-0.6689423257,-1.9913559574  
 C,0,3.9231620331,-0.6004082494,-0.7016983467

C,0,2.9504724354,0.0275024797,0.1160185917  
 N,0,3.0674876302,0.2791515945,1.4646377458  
 C,0,4.1864926858,-0.1293488019,1.97128252  
 N,0,5.1878019044,-0.7471957394,1.2572370114  
 C,0,5.1695690234,-1.0397730178,-0.14242309  
 O,0,6.155747449,-1.5854503462,-0.6448324708  
 O,0,-3.0743894844,1.7141000319,1.218393688  
 O,0,-1.407572509,-0.5053634305,2.0765396307  
 H,0,-0.21932781,3.0017358184,-2.0440276216  
 H,0,-0.8565572103,4.0274349391,-0.7471012557  
 H,0,-2.4108447763,2.1689738174,-1.1476335496  
 H,0,4.3872413415,0.0086658792,3.0334151252  
 H,0,-1.2470434853,2.5236985463,1.4787031244  
 H,0,0.0918734797,0.6798360008,1.426145024  
 H,0,-2.2978097493,-0.9710290632,1.7259473688  
 H,0,-3.5182913701,1.0076314692,0.594205475  
 H,0,6.0358207952,-1.0404039385,1.7262385677  
 H,0,1.1774595828,2.0596053948,-0.3732349957  
 H,0,1.5906733054,0.0113953171,-2.737585402  
 O,0,-2.8545990987,-2.1753311866,-1.2655517902  
 P,0,-3.7498562362,-1.4304832678,-0.2852701531  
 O,0,-5.3408403737,-1.9620839393,-0.5372753491  
 O,0,-3.4491201792,-1.6917186336,1.215281482  
 O,0,-3.8983494675,0.1082759109,-0.5564677123  
 H,0,-0.5399436602,-1.1564774273,0.5601549247  
 H,0,-5.797237509,-1.1101953073,-0.6159261308

### LG 2.9 Nuc 1.9

grid1lg29.1

E(RB+HF-LYP) = -1626.36992118

|                                              |          |
|----------------------------------------------|----------|
| Zero-point correction=                       | 0.264821 |
| (Hartree/Particle)                           |          |
| Thermal correction to Energy=                | 0.286332 |
| Thermal correction to Enthalpy=              | 0.287276 |
| Thermal correction to Gibbs Free Energy=     | 0.212149 |
| Sum of electronic and zero-point Energies=   | -        |
| 1626.105100                                  |          |
| Sum of electronic and thermal Energies=      | -        |
| 1626.083589                                  |          |
| Sum of electronic and thermal Enthalpies=    | -        |
| 1626.082645                                  |          |
| Sum of electronic and thermal Free Energies= | -        |
| 1626.157772                                  |          |

|       | E (Thermal) | CV             | S              |
|-------|-------------|----------------|----------------|
|       | KCal/Mol    | Cal/Mol-Kelvin | Cal/Mol-Kelvin |
| Total | 179.676     | 80.873         | 158.118        |

C,0,1.290922749,1.8321070488,-0.5991603297  
 C,0,0.9455173037,0.7504088992,-1.6224654781  
 O,0,1.6018471225,-0.3683879739,-1.3479880547  
 C,0,2.7212772144,-0.1353499006,-0.4264084379  
 C,0,2.6837243388,1.359208295,-0.0273973544  
 C,0,2.5367821098,-1.1165362602,0.7270058214  
 O,0,1.4655328269,-0.8025049392,1.5838467806  
 N,0,-0.9456728686,-0.6863696656,0.0415839136  
 C,0,-1.2632326878,-1.7196264564,-0.7918358005  
 N,0,-2.5239184873,-2.1674236238,-0.7771261351  
 C,0,-3.1047646156,-1.3548735215,0.1633982902  
 C,0,-2.1285373676,-0.4514883142,0.6656380219  
 N,0,-2.3444387982,0.5087053649,1.6315359099  
 C,0,-3.5614050746,0.5389599705,2.0706137701  
 N,0,-4.570019881,-0.2954546973,1.6420011336  
 C,0,-4.4503787449,-1.3249125888,0.6570660966  
 O,0,-5.4495399015,-2.0015177191,0.3890822002  
 O,0,3.8145225232,2.0811112396,-0.4295667991  
 O,0,1.1505441972,3.1645155158,-0.9605936907  
 H,0,2.4423681527,-2.1350177433,0.3048859569

H,0,3.453509112,-1.101113497,1.3348629523  
 H,0,3.6346940601,-0.3518053418,-0.9880373042  
 H,0,-3.8492198986,1.2615749319,2.8347899621  
 H,0,2.6387003338,1.4424575686,1.0632856781  
 H,0,0.5565579947,1.6383118527,0.1972856251  
 H,0,1.7146310878,3.3640540662,-1.7624256739  
 H,0,3.9719945886,1.8996909255,-1.4029052883  
 H,0,-5.499512899,-0.20976737,2.0339230346  
 H,0,0.6353554233,-0.7497288548,1.0394045004  
 H,0,-0.507157692,-2.1447964525,-1.4444574083  
 O,0,1.4280672154,1.2750577105,-3.3836825828  
 P,0,2.7769320049,2.1081576975,-3.6004691379  
 O,0,2.9722128143,1.9982861825,-5.2589343079  
 O,0,2.5859122688,3.5735738749,-3.2513976397  
 O,0,3.9887160546,1.382264859,-2.998433134  
 H,0,-0.071447515,0.5965510111,-1.9480919322  
 H,0,3.5211694317,1.2063455257,-5.3691669981

### LG 2.9 Nuc 2.1

grid1lg29.2

E(RB+HF-LYP) = -1626.35753217

Zero-point correction= 0.263986  
 (Hartree/Particle)  
 Thermal correction to Energy= 0.285562  
 Thermal correction to Enthalpy= 0.286506  
 Thermal correction to Gibbs Free Energy= 0.210982  
 Sum of electronic and zero-point Energies= -  
 1626.093546  
 Sum of electronic and thermal Energies= -  
 1626.071970  
 Sum of electronic and thermal Enthalpies= -  
 1626.071026  
 Sum of electronic and thermal Free Energies= -  
 1626.146550

|       | E (Thermal)<br>KCal/Mol | CV<br>Cal/Mol-Kelvin | S<br>Cal/Mol-Kelvin |
|-------|-------------------------|----------------------|---------------------|
| Total | 179.193                 | 81.030               | 158.954             |

C,0,1.254049194,1.8150508594,-0.6178149672  
 C,0,0.9047984485,0.704124617,-1.5958319162  
 O,0,1.5722772958,-0.3883701438,-1.3477086553  
 C,0,2.7066812955,-0.1408996246,-0.4331088442  
 C,0,2.6562442834,1.3568632378,-0.04480135  
 C,0,2.5414846476,-1.1219679798,0.7226480228  
 O,0,1.4822116637,-0.8125349589,1.5948470015  
 N,0,-0.9487743554,-0.7519779486,0.0935551132  
 C,0,-1.2869709624,-1.7796958958,-0.7389402617  
 N,0,-2.5583280067,-2.1944915079,-0.7303777108  
 C,0,-3.1237049303,-1.3644634672,0.2042982334  
 C,0,-2.1292443931,-0.48345388,0.7085289556  
 N,0,-2.3264521444,0.4873541823,1.6674502391  
 C,0,-3.545670755,0.5520731178,2.0965994687  
 N,0,-4.5719657419,-0.2589791177,1.6658708359  
 C,0,-4.4716529292,-1.2980172116,0.6888699987  
 O,0,-5.4855267777,-1.949165385,0.415584018  
 O,0,3.777812129,2.0825052999,-0.4488490127  
 O,0,1.096143512,3.1315837026,-1.0075178361  
 H,0,2.4486345928,-2.1417583622,0.3040447416  
 H,0,3.4675504381,-1.0977783075,1.3151565766  
 H,0,3.6056682807,-0.3513533436,-1.018093268  
 H,0,-3.8203094425,1.287206743,2.8534587226  
 H,0,2.6057648611,1.4405784737,1.0457397373  
 H,0,0.5253332421,-1.6260335786,0.1890368382  
 H,0,1.6665647263,3.3284500503,-1.8167958893  
 H,0,3.9322741365,1.9141845061,-1.4314514008  
 H,0,-5.5021666336,-0.1454765108,2.0489913895  
 H,0,0.6379550596,-0.7849130086,1.0689645022

H,0,-0.5392607131,-2.2268500634,-1.3867135436  
 O,0,1.466168847,1.2351320904,-3.5484945812  
 P,0,2.7787482962,2.1090461949,-3.6453688918  
 O,0,3.132671587,2.0950789406,-5.2880174445  
 O,0,2.5336550977,3.5565739288,-3.2325131844  
 O,0,3.9925473319,1.4103961577,-2.9966313175  
 H,0,-0.0717863698,0.5708900617,-2.0322965786  
 H,0,3.8588196587,1.4536885945,-5.3326515812

### LG 2.9 Nuc 2.3

grid1lg29.3

E(RB+HF-LYP) = -1626.34802945

Zero-point correction= 0.262972  
 (Hartree/Particle)  
 Thermal correction to Energy= 0.284671  
 Thermal correction to Enthalpy= 0.285615  
 Thermal correction to Gibbs Free Energy= 0.209405  
 Sum of electronic and zero-point Energies= -  
 1626.085058  
 Sum of electronic and thermal Energies= -  
 1626.063359  
 Sum of electronic and thermal Enthalpies= -  
 1626.062414  
 Sum of electronic and thermal Free Energies= -  
 1626.138624

|       | E (Thermal)<br>KCal/Mol | CV<br>Cal/Mol-Kelvin | S<br>Cal/Mol-Kelvin |
|-------|-------------------------|----------------------|---------------------|
| Total | 178.634                 | 81.248               | 160.397             |

C,0,1.2078682637,1.7946414043,-0.6396374558  
 C,0,0.8768681993,0.664418901,-1.5928496647  
 O,0,1.5653067758,-0.4030179298,-1.3691107684  
 C,0,2.6945098016,-0.1394168211,-0.4361548653  
 C,0,2.6155979505,1.3577297403,-0.0519886113  
 C,0,2.536178176,-1.1281925674,0.712786804  
 O,0,1.4794997216,-0.8322863511,1.5916067044  
 N,0,-0.9550583011,-0.8061684299,0.1075662019  
 C,0,-1.3183900508,-1.8410674655,-0.7054597893  
 N,0,-2.5960369565,-2.2336202576,-0.6776633996  
 C,0,-3.1385153677,-1.3775804165,0.2473423527  
 C,0,-2.1251428273,-0.5064676302,0.728513391  
 N,0,-2.2958075909,0.4843139065,1.6714653372  
 C,0,-3.5098574934,0.5784292089,2.109948531  
 N,0,-4.5538571746,-0.221604304,1.7023493879  
 C,0,-4.4812296466,-1.2778879294,0.7414964783  
 O,0,-5.5077131173,-1.9170957586,0.4896956741  
 O,0,3.7242406095,2.0982994324,-0.4495390823  
 O,0,1.0338720435,3.0967954063,-1.0554476093  
 H,0,2.4516250261,-2.1465094666,0.2892382471  
 H,0,3.4650929411,-1.0987453272,1.3003197297  
 H,0,3.5922761588,-0.3358196777,-1.0267283945  
 H,0,-3.7644162713,1.3315101956,2.8559287373  
 H,0,2.5514315845,1.4396106754,1.0381712452  
 H,0,0.4747618798,1.6041702277,0.1651404074  
 H,0,1.6206212272,3.2927269326,-1.8665530432  
 H,0,3.8843728741,1.9345401229,-1.4393947365  
 H,0,-5.478516127,-0.0843996711,2.0911320015  
 H,0,0.6298643101,-0.8211406864,1.0731568999  
 H,0,-0.5853262174,-2.3124567944,-1.353141108  
 O,0,1.5117424362,1.2050180066,-3.7363710975  
 P,0,2.7893051142,2.1051736485,-3.6835190661  
 O,0,3.3159411585,2.1972459264,-5.281135981  
 O,0,2.4880422937,3.5312078208,-3.2137327725  
 O,0,3.9793300684,1.4199761725,-2.9639656275  
 H,0,-0.0432789852,0.5454576981,-2.1408639177  
 H,0,4.1270419826,1.6668796776,-5.2429349804

**LG 2.9 Nuc 2.5**

grid1lg29.4

E(RB+HF-LYP) = -1626.34116574

Zero-point correction= 0.262111  
 (Hartree/Particle)  
 Thermal correction to Energy= 0.283914  
 Thermal correction to Enthalpy= 0.284858  
 Thermal correction to Gibbs Free Energy= 0.208267  
 Sum of electronic and zero-point Energies= -  
 1626.079055  
 Sum of electronic and thermal Energies= -  
 1626.057252  
 Sum of electronic and thermal Enthalpies= -  
 1626.056308  
 Sum of electronic and thermal Free Energies= -  
 1626.132899

|       | E (Thermal)<br>KCal/Mol | CV<br>Cal/Mol-Kelvin | S<br>Cal/Mol-Kelvin |
|-------|-------------------------|----------------------|---------------------|
| Total | 178.159                 | 81.426               | 161.200             |

C,0,1.1529200034,1.7661301422,-0.6592875977  
 C,0,0.8586975362,0.6220674728,-1.5992534996  
 O,0,1.5777591815,-0.4167674776,-1.3962427963  
 C,0,2.6868831561,-0.1338600109,-0.4340787878  
 C,0,2.5652488401,1.3607143998,-0.0495842634  
 C,0,2.5362251978,-1.1351155761,0.7043752799  
 O,0,1.4736616857,-0.8661040332,1.5838218788  
 N,0,-0.95783531,-0.8640283555,0.1041913153  
 C,0,-1.3550819886,-1.9024324716,-0.6883684382  
 N,0,-2.6403029585,-2.265409182,-0.6369287611  
 C,0,-3.1506601902,-1.383268571,0.2822001612  
 C,0,-2.1124877007,-0.5277419004,0.7355286677  
 N,0,-2.2468173262,0.4820265577,1.6635760318  
 C,0,-3.4521651317,0.6110545896,2.1171225132  
 N,0,-4.5189358582,-0.1724396653,1.7379786797  
 C,0,-4.4836462018,-1.2459857362,0.7941379267  
 O,0,-5.5269144405,-1.8664596944,0.5675210937  
 O,0,3.6560486237,2.126243137,-0.4360725606  
 O,0,0.9594379153,3.0535566913,-1.1000353204  
 H,0,2.4721692706,-2.1509779553,0.2715927728  
 H,0,3.4633693467,-1.0941579058,1.293734966  
 H,0,3.5916058382,-0.3060702975,-1.0209331166  
 H,0,-3.6790647944,1.3824757856,2.8530481097  
 H,0,2.4817329223,1.4376430687,1.0396889408  
 H,0,0.413119404,1.5668083071,0.1391281397  
 H,0,1.5576352246,3.2476095216,-1.9182377763  
 H,0,3.8222038167,1.9658425738,-1.4315224032  
 H,0,-5.4346433269,-0.0078731571,2.1372190426  
 H,0,0.6231913879,-0.8704362239,1.0666377289  
 H,0,-0.6422315747,-2.4009522249,-1.3386369808  
 O,0,1.57224221,1.1588462759,-3.9343593807  
 P,0,2.7926365469,2.0906656898,-3.7221474534  
 O,0,3.4885396969,2.2958961258,-5.247285707  
 O,0,2.4104841874,3.4884850515,-3.2084067045  
 O,0,3.947062776,1.4262629163,-2.9179514622  
 H,0,0.0081944136,0.5159500568,-2.2538031019  
 H,0,4.3519620908,1.8764696956,-5.1087009768

**LG 2.9 Nuc 2.7**

grid1lg29.5

E(RB+HF-LYP) = -1626.33640271

Zero-point correction= 0.261200  
 (Hartree/Particle)  
 Thermal correction to Energy= 0.283075  
 Thermal correction to Enthalpy= 0.284020  
 Thermal correction to Gibbs Free Energy= 0.206987

Sum of electronic and zero-point Energies= -  
 1626.075203  
 Sum of electronic and thermal Energies= -  
 1626.053327  
 Sum of electronic and thermal Enthalpies= -  
 1626.052383  
 Sum of electronic and thermal Free Energies= -  
 1626.129415

|       | E (Thermal)<br>KCal/Mol | CV<br>Cal/Mol-Kelvin | S<br>Cal/Mol-Kelvin |
|-------|-------------------------|----------------------|---------------------|
| Total | 177.632                 | 81.504               | 162.128             |

C,0,1.1892515608,1.7816077717,-0.6190998757  
 C,0,0.8686579263,0.6447263751,-1.5510485118  
 O,0,1.5940861628,-0.3897281362,-1.3959923337  
 C,0,2.7011961629,-0.1378838205,-0.4172777715  
 C,0,2.6174617294,1.3635313411,-0.0462581389  
 C,0,2.5097708625,-1.128367639,0.7249167081  
 O,0,1.4521890646,-0.8194716403,1.5963737555  
 N,0,-0.9617782907,-0.874795936,0.1074291693  
 C,0,-1.3534145283,-1.9238254407,-0.6741900075  
 N,0,-2.6370084971,-2.290680434,-0.6203263122  
 C,0,-3.1524444192,-1.3993793629,0.2871932084  
 C,0,-2.1191814359,-0.534199261,0.7319909198  
 N,0,-2.2581668226,0.4849678586,1.6486789241  
 C,0,-3.4645844647,0.6137612146,2.0996962965  
 N,0,-4.5273771834,-0.1785365753,1.728300177  
 C,0,-4.4865172952,-1.2627831113,0.7968937891  
 O,0,-5.5262012672,-1.8911674918,0.5770761651  
 O,0,3.7001318478,2.1047662744,-0.4863295925  
 O,0,0.9963270076,3.0631793365,-1.0669520448  
 H,0,2.4158443907,-2.1440140533,0.2978901233  
 H,0,3.4352652661,-1.113537472,1.3181326236  
 H,0,3.6019113537,-0.3422085059,-0.9992775075  
 H,0,-3.6954106186,1.392171233,2.8268945216  
 H,0,2.569763684,1.4548685068,1.044366739  
 H,0,0.4709335717,1.5856939887,0.200949296  
 H,0,1.5672096317,3.2364745217,-1.9258846443  
 H,0,3.8067367337,1.9298297493,-1.4954175531  
 H,0,-5.4440384827,-0.0138870074,2.1253338481  
 H,0,0.6002107081,-0.8431771984,1.0812498731  
 H,0,-0.6379636404,-2.4268691182,-1.3180738907  
 O,0,1.5213514731,1.1552644615,-4.1207440999  
 P,0,2.7236138949,2.0544023198,-3.785738803  
 O,0,3.5371391063,2.3433504741,-5.2409657278  
 O,0,2.3368984338,3.4356071813,-3.214196176  
 O,0,3.8298339578,1.3512005461,-2.9370492195  
 H,0,0.0636762458,0.5832698483,-2.2694273048  
 H,0,4.4168706399,2.0005068215,-5.0194504623

**LG 2.9 Nuc 2.9**

grid1lg29.6

E(RB+HF-LYP) = -1626.33309138

Zero-point correction= 0.260414  
 (Hartree/Particle)  
 Thermal correction to Energy= 0.282406  
 Thermal correction to Enthalpy= 0.283351  
 Thermal correction to Gibbs Free Energy= 0.205792  
 Sum of electronic and zero-point Energies= -  
 1626.072678  
 Sum of electronic and thermal Energies= -  
 1626.050685  
 Sum of electronic and thermal Enthalpies= -  
 1626.049741  
 Sum of electronic and thermal Free Energies= -  
 1626.127300

|       | E (Thermal)<br>KCal/Mol | CV<br>Cal/Mol-Kelvin | S<br>Cal/Mol-Kelvin |
|-------|-------------------------|----------------------|---------------------|
| Total | 177.213                 | 81.564               | 163.237             |

C,0,1.2031244554,1.7690236367,-0.5905978236  
 C,0,0.8901933466,0.640078932,-1.5272835307  
 O,0,1.6198226763,-0.389885763,-1.3915027297  
 C,0,2.7156210252,-0.1499390698,-0.3941580304  
 C,0,2.6424552704,1.355627869,-0.0353156515  
 C,0,2.5019720461,-1.1343031933,0.7495192728  
 O,0,1.4435524671,-0.8081108869,1.6128153113  
 N,0,-0.9525106188,-0.8890874669,0.1085919296  
 C,0,-1.3495345809,-1.940625271,-0.6673931421  
 N,0,-2.6353964703,-2.298116394,-0.6135541956  
 C,0,-3.1468433627,-1.3969676706,0.2866596969  
 C,0,-2.1092269039,-0.5358633915,0.7278743955  
 N,0,-2.2426605972,0.4903343344,1.637266945  
 C,0,-3.4493261892,0.6310956635,2.0841879704  
 N,0,-4.5166482621,-0.1562489398,1.715708915  
 C,0,-4.4811669949,-1.2477496372,0.7924951826  
 O,0,-5.5242506474,-1.8709314086,0.575106705  
 O,0,3.7104991013,2.0892174579,-0.5134531748  
 O,0,1.0013695764,3.0470748336,-1.035546234  
 H,0,2.3977006559,-2.1499847704,0.3253475999  
 H,0,3.4241873968,-1.1299510435,1.3480345601  
 H,0,3.6185353511,-0.3683250151,-0.9675233921  
 H,0,-3.6763002649,1.4163870846,2.8050939746  
 H,0,2.6159030903,1.4593526285,1.0551096289  
 H,0,0.4963181162,1.5619676094,0.2369936432  
 H,0,1.5325625045,3.2075314849,-1.9351804397  
 H,0,3.7653420152,1.9122620389,-1.5330016647  
 H,0,-5.4331629327,0.0180230648,2.1089745705  
 H,0,0.5929444627,-0.8427730191,1.0952061552  
 H,0,-0.6365565795,-2.4525675063,-1.3069788021  
 O,0,1.5050784392,1.1369958956,-4.3174417254  
 P,0,2.6506358603,2.0347600757,-3.846889341  
 O,0,3.5822590914,2.4190799291,-5.2082071872  
 O,0,2.2057104816,3.3865988659,-3.2355904433  
 O,0,3.7076732398,1.3200649671,-2.9390745254  
 H,0,0.1366956015,0.6097627714,-2.3059566668  
 H,0,4.455672603,2.1208589241,-4.9106715964

### LG 2.9 Nuc 3.1

grid1lg29.7

E(RB+HF-LYP) = -1626.39164653

|                                              |          |
|----------------------------------------------|----------|
| Zero-point correction=                       | 0.266607 |
| (Hartree/Particle)                           |          |
| Thermal correction to Energy=                | 0.288612 |
| Thermal correction to Enthalpy=              | 0.289556 |
| Thermal correction to Gibbs Free Energy=     | 0.212253 |
| Sum of electronic and zero-point Energies=   | -        |
| 1626.125040                                  |          |
| Sum of electronic and thermal Energies=      | -        |
| 1626.103035                                  |          |
| Sum of electronic and thermal Enthalpies=    | -        |
| 1626.102091                                  |          |
| Sum of electronic and thermal Free Energies= | -        |
| 1626.179393                                  |          |

|       | E (Thermal)<br>KCal/Mol | CV<br>Cal/Mol-Kelvin | S<br>Cal/Mol-Kelvin |
|-------|-------------------------|----------------------|---------------------|
| Total | 181.107                 | 82.311               | 162.697             |

C,0,1.5846343606,1.6399451188,-0.4256551216  
 C,0,1.3466176529,0.6439606642,-1.5831414314  
 O,0,1.8707828906,-0.5777932912,-1.1351714597  
 C,0,2.9007816771,-0.3539085051,-0.1450517145  
 C,0,2.987646479,1.1738392118,0.0519676443

C,0,2.5404787203,-1.1620347855,1.1020297496  
 O,0,1.4242105769,-0.6747609079,1.8036370289  
 N,0,-0.7559679663,-0.6007304217,-0.021132419  
 C,0,-1.0056903436,-1.710222307,-0.7766848688  
 N,0,-2.2592865435,-2.1778917101,-0.8049342608  
 C,0,-2.9128142352,-1.2948642458,0.0167737451  
 C,0,-1.9820167241,-0.3333369591,0.4985472993  
 N,0,-2.27239125,0.6992742296,1.3652677269  
 C,0,-3.515895607,0.7469772695,1.719724373  
 N,0,-4.4848650041,-0.1375466183,1.2990525505  
 C,0,-4.2868088011,-1.2483293007,0.4207180231  
 O,0,-5.2583953165,-1.9669529688,0.1558475662  
 O,0,4.0469675516,1.7516961829,-0.7092131718  
 O,0,1.462030037,3.0058859283,-0.7147725454  
 H,0,2.4036614475,-2.2151343521,0.7894196073  
 H,0,3.3968882715,-1.1397987455,1.7948982301  
 H,0,3.8589763148,-0.7224724561,-0.5439918201  
 H,0,-3.8619931656,1.526711452,2.399264658  
 H,0,3.1726787367,1.4384246552,1.0975034281  
 H,0,0.8620554707,1.4071652447,0.3589283003  
 H,0,1.8293593098,3.2116979579,-1.3096037083  
 H,0,3.7352311101,1.7042886826,-1.6348334792  
 H,0,-5.4394224027,-0.0349464548,1.6200914374  
 H,0,0.6605716804,-0.6384385561,1.1636770986  
 H,0,-0.2016682034,-2.1758075419,-1.3096037083  
 O,0,0.2105521578,1.8006875257,-4.2253623418  
 P,0,1.6185477815,2.1283829862,-3.8566015571  
 O,0,2.6611682642,1.7066530205,-5.0903330354  
 O,0,2.0851030529,3.5009098361,-3.3958986195  
 O,0,2.1720982533,1.0422165697,-2.711704257  
 H,0,0.3180251509,0.5138379582,-1.9051664868  
 H,0,3.3503930849,2.387083254,-5.0418078841

### LG 3.1 Nuc 1.9

grid1lg31.1

E(RB+HF-LYP) = -1626.37328129

|                                              |          |
|----------------------------------------------|----------|
| Zero-point correction=                       | 0.264552 |
| (Hartree/Particle)                           |          |
| Thermal correction to Energy=                | 0.286121 |
| Thermal correction to Enthalpy=              | 0.287065 |
| Thermal correction to Gibbs Free Energy=     | 0.211524 |
| Sum of electronic and zero-point Energies=   | -        |
| 1626.108729                                  |          |
| Sum of electronic and thermal Energies=      | -        |
| 1626.087161                                  |          |
| Sum of electronic and thermal Enthalpies=    | -        |
| 1626.086217                                  |          |
| Sum of electronic and thermal Free Energies= | -        |
| 1626.161757                                  |          |

|       | E (Thermal)<br>KCal/Mol | CV<br>Cal/Mol-Kelvin | S<br>Cal/Mol-Kelvin |
|-------|-------------------------|----------------------|---------------------|
| Total | 179.543                 | 80.902               | 158.988             |

C,0,1.3630087546,1.882937499,-0.6360257192  
 C,0,0.9965469651,0.8133837998,-1.6639072911  
 O,0,1.5912877406,-0.3316078127,-1.3599970928  
 C,0,2.7116095456,-0.1363901826,-0.4285049002  
 C,0,2.7279958662,1.361599196,-0.0406546563  
 C,0,2.4814243838,-1.1020047992,0.7307551567  
 O,0,1.429442321,-0.7359021332,1.588514719  
 N,0,-1.0152551628,-0.7168988397,0.130774155  
 C,0,-1.3382797612,-1.6500003099,-0.8102855974  
 N,0,-2.6113502555,-2.0583395113,-0.8694209036  
 C,0,-3.1934226559,-1.3262396073,0.1336614593  
 C,0,-2.2061019224,-0.5067319604,0.7466549532  
 N,0,-2.42122593,0.3599174205,1.7976052346  
 C,0,-3.6484868552,0.3838271414,2.2076014384

N,0,-4.6682259162,-0.373116447,1.6741134007  
 C,0,-4.5505080384,-1.3040320673,0.5952389571  
 O,0,-5.5606420256,-1.9198580247,0.2372682166  
 O,0,3.8920240447,2.0362914318,-0.4295130962  
 O,0,1.2692922253,3.2189580498,-0.9960367624  
 H,0,2.3415241404,-2.1171524075,0.3136790005  
 H,0,3.4003850133,-1.1239650979,1.3353340995  
 H,0,3.6206095239,-0.3916385575,-0.9812515082  
 H,0,-3.9368200858,1.0362719063,3.0324010103  
 H,0,2.6689829065,1.4540207561,1.0483449304  
 H,0,0.6112647986,1.7085345926,0.1500212854  
 H,0,1.8478911982,3.399727609,-1.7928452379  
 H,0,4.0573613642,1.8483133595,-1.4001020052  
 H,0,-5.6054998522,-0.2972818168,2.0491623058  
 H,0,0.5836678303,-0.7103753841,1.0623508937  
 H,0,-0.5777438232,-2.0309825493,-1.4844455367  
 O,0,1.5256801027,1.2995438965,-3.4227886695  
 P,0,2.8991363381,2.1001548426,-3.6161923384  
 O,0,3.1149159074,1.9891116174,-5.2711660145  
 O,0,2.738151807,3.5687590141,-3.2651336886  
 O,0,4.0829000113,1.3419299864,-3.0000063248  
 H,0,-0.0233966972,0.6976651618,-2.0022790158  
 H,0,3.6641006628,1.1962378478,-5.373258697

### LG 3.1 Nuc 2.1

grid1lg31.2

E(RB+HF-LYP) = -1626.36031234

|                                              |          |
|----------------------------------------------|----------|
| Zero-point correction=                       | 0.263705 |
| (Hartree/Particle)                           |          |
| Thermal correction to Energy=                | 0.285347 |
| Thermal correction to Enthalpy=              | 0.286291 |
| Thermal correction to Gibbs Free Energy=     | 0.210340 |
| Sum of electronic and zero-point Energies=   | -        |
| 1626.096608                                  |          |
| Sum of electronic and thermal Energies=      | -        |
| 1626.074966                                  |          |
| Sum of electronic and thermal Enthalpies=    | -        |
| 1626.074021                                  |          |
| Sum of electronic and thermal Free Energies= | -        |
| 1626.149972                                  |          |

|       | E (Thermal) | CV             | S              |
|-------|-------------|----------------|----------------|
|       | KCal/Mol    | Cal/Mol-Kelvin | Cal/Mol-Kelvin |
| Total | 179.058     | 81.061         | 159.852        |

C,0,1.3247566365,1.8798338862,-0.6712731506  
 C,0,0.9557558848,0.7829590911,-1.6572417596  
 O,0,1.5515857347,-0.3410905924,-1.3707471329  
 C,0,2.6828832647,-0.1368715335,-0.4382523487  
 C,0,2.6896831383,1.3640123,-0.059010279  
 C,0,2.4617454641,-1.1045083794,0.7197692889  
 O,0,1.4157525299,-0.7425463119,1.5852777375  
 N,0,-1.0358718287,-0.758710528,0.1501505523  
 C,0,-1.3808414068,-1.6938287351,-0.7813633247  
 N,0,-2.6585469435,-2.0882474229,-0.821636263  
 C,0,-3.2197956469,-1.3433361808,0.1839113976  
 C,0,-2.2167613471,-0.5310704931,0.7793860906  
 N,0,-2.408741087,0.3452630099,1.8265080051  
 C,0,-3.6305722229,0.3855627802,2.2513896907  
 N,0,-4.6649034562,-3.2004359354,-1.0637966215  
 C,0,-4.5710443175,-1.3030214813,0.6619802616  
 O,0,-5.5913731143,-1.9106167346,0.320772726  
 O,0,3.8521285039,2.0379411344,-0.4357038304  
 O,0,1.2271322243,3.2004359354,-1.0637966215  
 H,0,2.3244496121,-2.1202580297,0.3038549552  
 H,0,3.3862341265,-1.1210258679,1.3154121609  
 H,0,3.5804561365,-0.3874346054,-1.0096966212  
 H,0,-3.9013331731,1.0469977201,3.0748458713

H,0,2.6136116292,1.4567910047,1.0290590084  
 H,0,0.5686408807,1.7161542445,0.116960781  
 H,0,1.8243055735,3.3726903355,-1.8607541167  
 H,0,4.0255848575,1.8621801178,-1.4136737736  
 H,0,-5.5965085858,-0.2747392805,2.1220934352  
 H,0,0.5622379823,-0.7334009921,1.0702998938  
 H,0,-0.6342399098,-2.0883656895,-1.4635741534  
 O,0,1.5942174756,1.2676763233,-3.5982240203  
 P,0,2.9375462971,2.0990824562,-3.658709921  
 O,0,3.3319608527,2.0722095463,-5.2907329175  
 O,0,2.7277872957,3.554091346,-3.2521049647  
 O,0,4.1093253592,1.3612093093,-2.9784972409  
 H,0,-0.0170957105,0.6902661504,-2.1159435879  
 H,0,4.0420917604,1.4120885591,-5.3169942344

### LG 3.1 Nuc 2.3

grid1lg31.3

E(RB+HF-LYP) = -1626.35037102

|                                              |          |
|----------------------------------------------|----------|
| Zero-point correction=                       | 0.262848 |
| (Hartree/Particle)                           |          |
| Thermal correction to Energy=                | 0.284579 |
| Thermal correction to Enthalpy=              | 0.285524 |
| Thermal correction to Gibbs Free Energy=     | 0.209089 |
| Sum of electronic and zero-point Energies=   | -        |
| 1626.087523                                  |          |
| Sum of electronic and thermal Energies=      | -        |
| 1626.065792                                  |          |
| Sum of electronic and thermal Enthalpies=    | -        |
| 1626.064847                                  |          |
| Sum of electronic and thermal Free Energies= | -        |
| 1626.141282                                  |          |

|       | E (Thermal) | CV             | S              |
|-------|-------------|----------------|----------------|
|       | KCal/Mol    | Cal/Mol-Kelvin | Cal/Mol-Kelvin |
| Total | 178.576     | 81.234         | 160.870        |

C,0,1.2955840755,1.8792560834,-0.6948099335  
 C,0,0.9232079033,0.7663871484,-1.6518859562  
 O,0,1.5285987229,-0.3416105035,-1.3912776264  
 C,0,2.6619050605,-0.1352974688,-0.4463707067  
 C,0,2.6615285069,1.3669421809,-0.0722226984  
 C,0,2.439711123,-1.1059854929,0.7082798237  
 O,0,1.4017778787,-0.7424816847,1.5818549623  
 N,0,-1.0503439413,-0.7896243717,0.1630293011  
 C,0,-1.4098221927,-1.7343228063,-0.7535983761  
 N,0,-2.6895393024,-2.122127855,-0.7751828249  
 C,0,-3.2360724297,-1.3622667916,0.2274046118  
 C,0,-2.2235311454,-0.5476679835,0.8018004376  
 N,0,-2.3992337456,0.3429304861,1.8394457845  
 C,0,-3.6161992515,0.3946915253,2.2770801483  
 N,0,-4.6593778461,-0.3562936711,1.7828708374  
 C,0,-4.5818052118,-1.3101290615,0.7204363276  
 O,0,-5.6080008884,-1.9173474625,0.3980574312  
 O,0,3.8195060176,2.0407511872,-0.4459663181  
 O,0,1.1986318437,3.1874008246,-1.113171541  
 H,0,2.2971816197,-2.1200294616,0.2907054814  
 H,0,3.368748398,-1.1264515597,1.296293112  
 H,0,3.5527065879,-0.3836670459,-1.0279808859  
 H,0,-3.8746685148,1.0682809626,3.0944900243  
 H,0,2.5754073627,1.4592074986,1.0153032991  
 H,0,0.5357351193,1.7239941925,0.0949566223  
 H,0,1.8128265804,3.3486970947,-1.9124297421  
 H,0,3.9931166162,1.8656835452,-1.4309309391  
 H,0,-5.5861593351,-0.257958991,2.17807849  
 H,0,0.5415424851,-0.7472218379,1.0774244914  
 H,0,-0.6734043951,-2.1418819629,-1.4394552197  
 O,0,1.6424686552,1.2563413144,-3.7808778555  
 P,0,2.9629223277,2.0916668205,-3.6995785695

O,0,3.5246394198,2.1552848136,-5.2860519752  
 O,0,2.7218264253,3.5310247227,-3.23617125  
 O,0,4.0988085776,1.346708919,-2.9545031002  
 H,0,0.0041417403,0.6960245179,-2.2129918289  
 H,0,4.3078796225,1.5857597943,-5.2326170375

### LG 3.1 Nuc 2.5

grid1lg31.4

E(RB+HF-LYP) = -1626.34306712

Zero-point correction= 0.261844  
 (Hartree/Particle)  
 Thermal correction to Energy= 0.283683  
 Thermal correction to Enthalpy= 0.284627  
 Thermal correction to Gibbs Free Energy= 0.207645  
 Sum of electronic and zero-point Energies= -  
 1626.081223  
 Sum of electronic and thermal Energies= -  
 1626.059384  
 Sum of electronic and thermal Enthalpies= -  
 1626.058440  
 Sum of electronic and thermal Free Energies= -  
 1626.135422

|       | E (Thermal)<br>KCal/Mol | CV<br>Cal/Mol-Kelvin | S<br>Cal/Mol-Kelvin |
|-------|-------------------------|----------------------|---------------------|
| Total | 178.014                 | 81.416               | 162.022             |

C,0,1.2770385635,1.8673843682,-0.6951487508  
 C,0,0.910043367,0.7489709148,-1.6391431925  
 O,0,1.5340296756,-0.3444410656,-1.409823578  
 C,0,2.6591682247,-0.1384681583,-0.4421162513  
 C,0,2.652095962,1.3649827063,-0.0751687133  
 C,0,2.4265301569,-1.1101894156,0.7089029549  
 O,0,1.393471452,-0.7415593092,1.5848962193  
 N,0,-1.0522050404,-0.8208525377,0.1761342607  
 C,0,-1.4230975781,-1.7738854831,-0.7275956088  
 N,0,-2.7059387123,-2.1500972635,-0.7396925772  
 C,0,-3.2422469291,-1.3723319389,0.254799067  
 C,0,-2.2212264505,-0.5596679335,0.8154511649  
 N,0,-2.3848026921,0.3459987989,1.8417091461  
 C,0,-3.5999047663,0.4149519558,2.2822755917  
 N,0,-4.6513092804,-0.3328493791,1.8013032388  
 C,0,-4.5860548481,-1.3013573459,0.7513831625  
 O,0,-5.6182202185,-1.9037104646,0.4403048811  
 O,0,3.7989091997,2.041723756,-0.4638381254  
 O,0,1.1692206848,3.1663677429,-1.1269883293  
 H,0,2.2780239327,-2.1225058941,0.2896293266  
 H,0,3.3569926466,-1.1376115897,1.2943638384  
 H,0,3.5495393349,-0.3879809467,-1.0232487815  
 H,0,-3.8494342794,1.1018265534,3.0912557373  
 H,0,2.5698052307,1.4609424785,1.0125117994  
 H,0,0.5205593547,1.706185734,0.0986172496  
 H,0,1.7844272179,3.3225016567,-1.9436734208  
 H,0,3.9561371266,1.864964373,-1.4584176985  
 H,0,-5.575953453,-0.2202790451,2.1979770144  
 H,0,0.5293711051,-0.7586610897,1.0863604148  
 H,0,-0.6933500502,-2.1967654576,-1.4114670818  
 O,0,1.662928802,1.2334283728,-3.9733372672  
 P,0,2.9444922061,2.0772683472,-3.7462231074  
 O,0,3.6588513182,2.2487330858,-5.2653568021  
 O,0,2.6559245665,3.4940625989,-3.2229593208  
 O,0,4.0435053286,1.3255552751,-2.9428665623  
 H,0,0.0536844808,0.7010648887,-2.2944247373  
 H,0,4.4812388305,1.7509683309,-5.1367190015

### LG 3.1 Nuc 2.7

grid1lg31.5

E(RB+HF-LYP) = -1626.33796834

Zero-point correction= 0.260863  
 (Hartree/Particle)  
 Thermal correction to Energy= 0.282765  
 Thermal correction to Enthalpy= 0.283709  
 Thermal correction to Gibbs Free Energy= 0.206434  
 Sum of electronic and zero-point Energies= -  
 1626.077105  
 Sum of electronic and thermal Energies= -  
 1626.055203  
 Sum of electronic and thermal Enthalpies= -  
 1626.054259  
 Sum of electronic and thermal Free Energies= -  
 1626.131534

|       | E (Thermal)<br>KCal/Mol | CV<br>Cal/Mol-Kelvin | S<br>Cal/Mol-Kelvin |
|-------|-------------------------|----------------------|---------------------|
| Total | 177.438                 | 81.531               | 162.639             |

C,0,1.2854390054,1.8581882596,-0.6653467615  
 C,0,0.9219651842,0.7443672809,-1.6073548251  
 O,0,1.5633073039,-0.3380698447,-1.4150414613  
 C,0,2.6751348616,-0.1440855176,-0.4216587009  
 C,0,2.675392994,1.3622331482,-0.0650574467  
 C,0,2.4167495216,-1.1111440956,0.7277048154  
 O,0,1.386385012,-0.7243341973,1.5979957969  
 N,0,-1.0435644709,-0.8492633572,0.1834641379  
 C,0,-1.421691299,-1.8043708768,-0.7153792308  
 N,0,-2.708404373,-2.1657651072,-0.7292753563  
 C,0,-3.2396161786,-1.374500839,0.2573759934  
 C,0,-2.2121375036,-0.56939103,0.8159723269  
 N,0,-2.3683678899,0.3452243189,1.8351984605  
 C,0,-3.5842378658,0.4314742047,2.2707149419  
 N,0,-4.642221543,-0.3077091913,1.7912698236  
 C,0,-4.5843596617,-1.2848976141,0.748895394  
 O,0,-5.6217082637,-1.8783551778,0.4389631363  
 O,0,3.8058922281,2.0356755223,-0.4930757288  
 O,0,1.1659496923,3.1511047309,-1.1011216986  
 H,0,2.2542430396,-2.1211350871,0.3086040271  
 H,0,3.3445200851,-1.153509354,1.3166702433  
 H,0,3.5665606452,-0.4063854679,-0.9949312884  
 H,0,-3.8286203849,1.1270563824,3.0737230231  
 H,0,2.6151265689,1.4666571491,1.0234785532  
 H,0,0.5407295677,1.6852643485,0.1384227343  
 H,0,1.7517790895,3.295666197,-1.9594459101  
 H,0,3.9145557375,1.8552401995,-1.5010421588  
 H,0,-5.5669608006,-0.1814568859,2.183602196  
 H,0,0.520832684,-0.7584861367,1.1017998512  
 H,0,-0.6949397525,-2.2400513186,-1.3944804295  
 O,0,1.6302899919,1.2095898745,-4.1709155791  
 P,0,2.868172693,2.0486889161,-3.8065518045  
 O,0,3.7209509566,2.3103454308,-5.242190039  
 O,0,2.5355929708,3.4439259449,-3.2339139492  
 O,0,3.9217655575,1.2861995017,-2.9432266048  
 H,0,0.1292620172,0.7268480952,-2.3428845844  
 H,0,4.5684770495,1.8938292134,-5.0212957372

### LG 3.1 Nuc 2.9

grid1lg31.6

E(RB+HF-LYP) = -1626.33455597

Zero-point correction= 0.260041  
 (Hartree/Particle)  
 Thermal correction to Energy= 0.282081  
 Thermal correction to Enthalpy= 0.283025  
 Thermal correction to Gibbs Free Energy= 0.204713  
 Sum of electronic and zero-point Energies= -  
 1626.074515



Sum of electronic and thermal Energies= -  
1626.052475  
Sum of electronic and thermal Enthalpies= -  
1626.051531  
Sum of electronic and thermal Free Energies= -  
1626.129843

|       | E (Thermal)<br>KCal/Mol | CV<br>Cal/Mol-Kelvin | S<br>Cal/Mol-Kelvin |
|-------|-------------------------|----------------------|---------------------|
| Total | 177.008                 | 81.556               | 164.821             |

C,0,1.3482617929,1.8391420315,-0.6105780983  
C,0,0.9794046973,0.7455098362,-1.5640914329  
O,0,1.6093406382,-0.3438120055,-1.3945494222  
C,0,2.7062684224,-0.1797626584,-0.3795191658  
C,0,2.7530729555,1.3333731559,-0.0495563494  
C,0,2.3953939923,-1.1201716046,0.7797758395  
O,0,1.3642097702,-0.6829435065,1.6241193081  
N,0,-1.0304515661,-0.8529766763,0.1723729656  
C,0,-1.3990107174,-1.8375333243,-0.6984341428  
N,0,-2.6834217199,-2.2059309162,-0.7071275484  
C,0,-3.2239101445,-1.3870608194,0.2517699362  
C,0,-2.2038915264,-0.5596903766,0.7902458096  
N,0,-2.3691823877,0.3846120743,1.7803375073  
C,0,-3.587782348,0.4786203693,2.2065843732  
N,0,-4.6395878301,-0.2799295284,1.744546763  
C,0,-4.571715043,-1.2890191576,0.7335945139  
O,0,-5.6042741785,-1.8973778608,0.4374785089  
O,0,3.8677236328,1.9766371622,-0.5487282156  
O,0,1.2179938927,3.1356997194,-1.0206549376  
H,0,2.2042049406,-2.1300718414,0.3734448766  
H,0,3.3116116689,-1.1859001488,1.3846045925  
H,0,3.5966297496,-0.4858658893,-0.9327236775  
H,0,-3.8395081754,1.1974435857,2.9864598694  
H,0,2.7395480998,1.4608394659,1.0384421097  
H,0,0.6254247124,1.641420213,0.2083742134  
H,0,1.7325357407,3.2784493281,-1.9356370134  
H,0,3.8759542614,1.8103808846,-1.5728940704  
H,0,-5.567088285,-0.1456426981,2.1275967341  
H,0,0.5027478033,-0.7343940318,1.1206851852  
H,0,-0.6670030382,-2.2889231399,-1.3614576104  
O,0,1.5222217545,1.2427369557,-4.3691055799  
P,0,2.7233399127,2.0528036417,-3.880206912  
O,0,3.6874292237,2.3904059626,-5.2295879707  
O,0,2.3711902153,3.4234023938,-3.248955426  
O,0,3.7206477405,1.2523031772,-2.9762127741  
H,0,0.2503800313,0.7740680141,-2.367824144  
H,0,4.5435357811,2.0538258387,-4.922922455

### LG 3.1 Nuc 3.1

grid1lg31.7

E(RB+HF-LYP) = -1626.39811486

|                                              |          |
|----------------------------------------------|----------|
| Zero-point correction=                       | 0.266612 |
| (Hartree/Particle)                           |          |
| Thermal correction to Energy=                | 0.288654 |
| Thermal correction to Enthalpy=              | 0.289598 |
| Thermal correction to Gibbs Free Energy=     | 0.212338 |
| Sum of electronic and zero-point Energies=   | -        |
| 1626.131503                                  |          |
| Sum of electronic and thermal Energies=      | -        |
| 1626.109461                                  |          |
| Sum of electronic and thermal Enthalpies=    | -        |
| 1626.108517                                  |          |
| Sum of electronic and thermal Free Energies= | -        |
| 1626.185777                                  |          |

|  | E (Thermal)<br>KCal/Mol | CV<br>Cal/Mol-Kelvin | S<br>Cal/Mol-Kelvin |
|--|-------------------------|----------------------|---------------------|
|--|-------------------------|----------------------|---------------------|

|       |         |        |         |
|-------|---------|--------|---------|
| Total | 181.133 | 82.265 | 162.608 |
|-------|---------|--------|---------|

C,0,1.748620647,1.7660045906,-0.3916672514  
C,0,1.4535779829,0.8087100489,-1.5685485691  
O,0,1.8783476545,-0.4546701003,-1.1272288003  
C,0,2.908087013,-0.3194912885,-0.118927179  
C,0,3.1108353644,1.1954691225,0.0881894621  
C,0,2.46404522,-1.103103273,1.1177081946  
O,0,1.3727978658,-0.5394998138,1.799238715  
N,0,-0.837940959,-0.5487743287,0.0176945958  
C,0,-1.0312399136,-1.600829841,-0.829221515  
N,0,-2.2661185771,-2.1099180107,-0.9197931526  
C,0,-2.966288341,-1.3200414367,-0.044019436  
C,0,-2.0812778366,-0.3662100997,0.5316012331  
N,0,-2.427791712,0.5853563032,1.4677468863  
C,0,-3.6787417423,0.5589530834,-1.7980955331  
N,0,-4.6051544913,-0.3253469083,1.289953976  
C,0,-4.3483190855,-1.3554126118,0.3319981269  
O,0,-5.2869463609,-2.0850616321,-0.0104241125  
O,0,4.214711902,1.6977135401,-0.6612794421  
O,0,1.7197553713,3.1411063625,-0.6587924051  
H,0,2.2580103711,-2.1425199836,0.7983677942  
H,0,3.3066594671,-1.1432573012,1.8264663845  
H,0,3.8400104422,-0.76035044,-0.505842637  
H,0,-4.0674227109,1.270273496,2.5278744308  
H,0,3.3073936502,1.4390020026,1.1368456203  
H,0,1.006767948,1.5654065431,0.3856514898  
H,0,2.1015043861,3.3342076722,-1.549962496  
H,0,3.9128514617,1.6907269223,-1.5908996539  
H,0,-5.5685875376,-0.2838140268,1.5979982046  
H,0,0.6036352889,-0.5084691583,1.1642177426  
H,0,-0.2001860422,-1.9904142634,-1.4069938516  
O,0,0.3941285784,2.0544375394,-4.202123916  
P,0,1.8235145673,2.3004283804,-3.8225284347  
O,0,2.8121818165,1.7903126275,-5.0633567764  
O,0,2.3656214636,3.624937762,-3.3428078729  
O,0,2.3003325829,1.1554324754,-2.6894049372  
H,0,0.414102188,0.7580993047,-1.883427581  
H,0,2.3107665473,1.085274361,-5.5027322104

### C. ANDN mechanism – arsenate grid – B3LYP/6-31G\*

#### LG 1.9 Nuc 1.9

grid1aslg19.1

E(RB+HF-LYP) = -3518.62814138

|                                              |          |
|----------------------------------------------|----------|
| Zero-point correction=                       | 0.262098 |
| (Hartree/Particle)                           |          |
| Thermal correction to Energy=                | 0.284293 |
| Thermal correction to Enthalpy=              | 0.285237 |
| Thermal correction to Gibbs Free Energy=     | 0.208041 |
| Sum of electronic and zero-point Energies=   | -        |
| 3518.366043                                  |          |
| Sum of electronic and thermal Energies=      | -        |
| 3518.343848                                  |          |
| Sum of electronic and thermal Enthalpies=    | -        |
| 3518.342904                                  |          |
| Sum of electronic and thermal Free Energies= | -        |
| 3518.420100                                  |          |

|       | E (Thermal)<br>KCal/Mol | CV<br>Cal/Mol-Kelvin | S<br>Cal/Mol-Kelvin |
|-------|-------------------------|----------------------|---------------------|
| Total | 178.397                 | 83.645               | 162.474             |

C,0,0.8192244506,1.5005557517,-0.3329002415  
C,0,0.466598737,0.325635823,-1.2849794797

O,0,1.3507992496,-0.7141147969,-1.1237252772  
 C,0,2.6191976225,-0.1866379114,-0.6553659697  
 C,0,2.3149817978,1.1343879898,0.0902354053  
 C,0,3.2403914853,-1.2840822781,0.1955380568  
 O,0,2.4180712552,-1.6793829971,1.2910189742  
 N,0,-0.8644051627,-0.5476170529,-0.2477441527  
 C,0,-0.9711497542,-1.9095717051,-0.2081984251  
 N,0,-2.1115740392,-2.4144190563,0.2670347881  
 C,0,-2.8321066632,-1.2860814921,0.5612415457  
 C,0,-2.0681964896,-0.134975689,0.2386445372  
 N,0,-2.4711752263,1.1691361469,0.4006114266  
 C,0,-3.6615416946,1.2878926253,0.8910494092  
 N,0,-4.4767115105,0.231529507,1.2337386569  
 C,0,-4.1531334485,-1.1529424024,1.1093318153  
 O,0,-4.9871660535,-1.9922795666,1.4604262051  
 O,0,3.3004675221,2.1150584187,-0.0840379368  
 O,0,0.5396989792,2.7975043397,-0.738109715  
 H,0,3.4702200313,-2.1562652916,-0.4427274026  
 H,0,4.184991354,-0.9136682699,0.6121498094  
 H,0,3.2456101718,0.0288223903,-1.5263523874  
 H,0,-4.0837851432,2.2779824126,1.0603097137  
 H,0,2.2856699077,0.924941013,1.1679584645  
 H,0,0.2108450437,1.3656129814,0.5640753832  
 H,0,1.0243448941,3.0809255787,-1.5641696536  
 H,0,3.619206887,2.1106613163,-1.041102996  
 H,0,-5.3990757187,0.4065238218,1.6130298436  
 H,0,1.5089979018,-1.6449372383,0.9436041479  
 H,0,-0.1591079993,-2.5290259555,-0.5679778408  
 O,0,1.3752399806,0.9629320174,-2.8271286843  
 As,0,2.4781050079,2.1936600564,-3.2694467558  
 O,0,2.7670849712,1.9559057112,-5.0481535659  
 O,0,1.8187659585,3.7071951043,-3.0165330825  
 O,0,4.0318840635,1.9063828301,-2.6568216568  
 H,0,-0.2702441767,0.30316107,-2.0610889653  
 H,0,3.6812202779,1.6262624176,-5.013767834

### LG 1.9 Nuc 2.1

grid1aslg19.4  
 E(RB+HF-LYP) = -3518.63687328

Zero-point correction= 0.261539  
 (Hartree/Particle)  
 Thermal correction to Energy= 0.283730  
 Thermal correction to Enthalpy= 0.284675  
 Thermal correction to Gibbs Free Energy= 0.208433  
 Sum of electronic and zero-point Energies= -  
 3518.375335  
 Sum of electronic and thermal Energies= -  
 3518.353143  
 Sum of electronic and thermal Enthalpies= -  
 3518.352199  
 Sum of electronic and thermal Free Energies= -  
 3518.428441

|       | E (Thermal)<br>KCal/Mol | CV<br>Cal/Mol-Kelvin | S<br>Cal/Mol-Kelvin |
|-------|-------------------------|----------------------|---------------------|
| Total | 178.044                 | 83.626               | 160.465             |

C,0,0.8102387371,1.4911559684,-0.347454259  
 C,0,0.4369558632,0.284118676,-1.2445687519  
 O,0,1.3331342771,-0.7297462238,-1.1096078718  
 C,0,2.6118743774,-0.1920338084,-0.6627188698  
 C,0,2.3084105114,1.1321418405,0.0783254175  
 C,0,3.2599522912,-1.278078249,0.1777572574  
 O,0,2.4620867837,-1.6854059157,1.2884354709  
 N,0,-0.9403316142,-0.5705764965,-0.2533205207  
 C,0,-1.0306254487,-1.9310679592,-0.183514843  
 N,0,-2.1563337308,-2.4261234293,0.3306522225  
 C,0,-2.8772924737,-1.2941704254,0.6139766949

C,0,-2.1327196081,-0.1456244933,0.246901941  
 N,0,-2.5375156411,1.1591696167,0.384377167  
 C,0,-3.716919524,1.282265056,0.9002120286  
 N,0,-4.5160370005,0.2298991537,1.2879067707  
 C,0,-4.1865989504,-1.1554319056,1.1898570687  
 O,0,-5.0047623697,-1.9914645159,1.5804248441  
 O,0,3.2895290043,2.110801815,-0.0979512219  
 O,0,0.519622055,2.7648592707,-0.8042389287  
 H,0,3.4928720417,-2.1480676571,-0.4617355689  
 H,0,4.2048255785,-0.8912903513,0.5778418996  
 H,0,3.2091473223,0.0260450415,-1.5531399573  
 H,0,-4.1411999645,2.2736097808,1.0548325408  
 H,0,2.2760314373,0.9226218775,1.1567824119  
 H,0,0.2073672844,1.3840814068,0.5595823586  
 H,0,1.0344068739,3.0437668133,-1.6220987785  
 H,0,3.6149378742,2.1100610774,-1.0603136024  
 H,0,-5.4300840247,0.4088855421,1.6851770433  
 H,0,1.5476571945,-1.6717478674,0.9555251376  
 H,0,-0.2198438235,-2.5503143228,-0.5458191853  
 O,0,1.4635693157,0.9146154234,-2.9646081124  
 As,0,2.5341462913,2.1835600823,-3.3171924101  
 O,0,2.9498545874,2.0663825883,-5.0885224845  
 O,0,1.8334518285,3.6754575087,-3.0203914064  
 O,0,4.0688283485,1.9245897826,-2.6337060253  
 H,0,-0.2029191492,0.3186350984,-2.1043986942  
 H,0,3.8865279147,1.819087821,-5.0036124234

### LG 1.9 Nuc 2.3

grid1aslg19.5  
 E(RB+HF-LYP) = -3518.64284228

Zero-point correction= 0.260893  
 (Hartree/Particle)  
 Thermal correction to Energy= 0.283113  
 Thermal correction to Enthalpy= 0.284057  
 Thermal correction to Gibbs Free Energy= 0.207583  
 Sum of electronic and zero-point Energies= -  
 3518.381949  
 Sum of electronic and thermal Energies= -  
 3518.359729  
 Sum of electronic and thermal Enthalpies= -  
 3518.358785  
 Sum of electronic and thermal Free Energies= -  
 3518.435259

|       | E (Thermal)<br>KCal/Mol | CV<br>Cal/Mol-Kelvin | S<br>Cal/Mol-Kelvin |
|-------|-------------------------|----------------------|---------------------|
| Total | 177.656                 | 83.605               | 160.953             |

C,0,0.8188107544,1.4814267579,-0.3216778331  
 C,0,0.420903985,0.2618531345,-1.1880593208  
 O,0,1.3268261982,-0.7373105576,-1.0836600427  
 C,0,2.6179526072,-0.1956073344,-0.6647366657  
 C,0,2.3252942731,1.1268267431,0.0828027225  
 C,0,3.2919764791,-1.2800751233,0.1554946087  
 O,0,2.5228028099,-1.6974389351,1.2833715757  
 N,0,-0.9870824423,-0.5858656395,-0.2346738151  
 C,0,-1.0657992035,-1.9442657813,-0.1358474618  
 N,0,-2.1877759348,-2.4288180043,0.3931585463  
 C,0,-2.913457808,-1.2930906974,0.6515041776  
 C,0,-2.1779165102,-0.1491772859,0.257005073  
 N,0,-2.5864543538,1.1562856704,0.3626114783  
 C,0,-3.7659980278,1.2856388036,0.8770967464  
 N,0,-4.558867207,0.2390711785,1.2911288091  
 C,0,-4.22325255,-1.1468173904,1.2255940057  
 O,0,-5.0358130715,-1.9776190624,1.6362333139  
 O,0,3.2966831343,2.1075099896,-0.1121404017  
 O,0,0.5264236163,2.7406516092,-0.8104826304  
 H,0,3.5164171339,-2.1461967281,-0.4916498705

H,0,4.2422583052,-0.8869568901,0.5353578303  
 H,0,3.185687534,0.0253163664,-1.5739646474  
 H,0,-4.1947375788,2.2782892483,1.0080413462  
 H,0,2.3100714684,0.9152721999,1.1616697013  
 H,0,0.2293298127,1.391133335,0.5974620571  
 H,0,1.0453363269,3.0086449122,-1.6399932177  
 H,0,3.6021384009,2.1159542896,-1.0865817322  
 H,0,-5.4737221212,0.4232150274,1.6842492454  
 H,0,1.6023159999,-1.6995598816,0.9683619088  
 H,0,-0.2515191178,-2.5653748192,-0.4866092252  
 O,0,1.5087937257,0.8316629295,-3.1327460213  
 As,0,2.537579595,2.1485108479,-3.368403731  
 O,0,3.0533551756,2.1732696794,-5.1204604267  
 O,0,1.7865326755,3.606629787,-3.0094271359  
 O,0,4.0553739302,1.9194048894,-2.6300463111  
 H,0,-0.1425672104,0.3451098913,-2.1006511624  
 H,0,4.0043436657,2.0171644602,-4.9896653338

### LG 1.9 Nuc 2.5

grid1aslg19.6

E(RB+HF-LYP) = -3518.64651502

Zero-point correction= 0.260278  
 (Hartree/Particle)  
 Thermal correction to Energy= 0.282569  
 Thermal correction to Enthalpy= 0.283513  
 Thermal correction to Gibbs Free Energy= 0.206577  
 Sum of electronic and zero-point Energies= -  
 3518.386237  
 Sum of electronic and thermal Energies= -  
 3518.363946  
 Sum of electronic and thermal Enthalpies= -  
 3518.363002  
 Sum of electronic and thermal Free Energies= -  
 3518.439938

|       | E (Thermal) | CV             | S              |
|-------|-------------|----------------|----------------|
|       | KCal/Mol    | Cal/Mol-Kelvin | Cal/Mol-Kelvin |
| Total | 177.315     | 83.570         | 161.924        |

C,0,0.8325691711,1.4751074302,-0.2761316002  
 C,0,0.4254798595,0.2535505401,-1.1329594717  
 O,0,1.3374046511,-0.7407487241,-1.0375976689  
 C,0,2.6372656853,-0.1909077574,-0.6455169141  
 C,0,2.3494539312,1.1316019245,0.1031520868  
 C,0,3.3323278311,-1.270787391,0.1621917152  
 O,0,2.5772103543,-1.6970249636,1.2970631081  
 N,0,-1.0187787063,-0.5947610563,-0.2360298365  
 C,0,-1.1024419679,-1.9522567578,-0.1427968797  
 N,0,-2.2281346546,-2.4279228335,0.384049608  
 C,0,-2.9464467893,-1.2874110484,0.6446409935  
 C,0,-2.2049650736,-0.1464313088,0.2549766572  
 N,0,-2.602119114,1.1610496574,0.3649660467  
 C,0,-3.7809084971,1.2966733478,0.8801292908  
 N,0,-4.5809481872,0.2543245959,1.2899871855  
 C,0,-4.2554075572,-1.133858374,1.2196521618  
 O,0,-5.072332488,-1.9604430025,1.6285194395  
 O,0,3.3052599619,2.1180994596,-0.1206257048  
 O,0,0.5323298285,2.7229628086,-0.7823369899  
 H,0,3.5569075901,-2.1331615309,-0.4893630445  
 H,0,4.2825614447,-0.8698146751,0.5332176131  
 H,0,3.1821193992,0.030396797,-1.5691519216  
 H,0,-4.2021098991,2.2919030439,1.014829597  
 H,0,2.3551727594,0.9231227274,1.1828954514  
 H,0,0.257931471,1.3877069909,0.6540944706  
 H,0,1.0284304215,2.9699382664,-1.6438755554  
 H,0,3.5750887465,2.1229581606,-1.1095613146  
 H,0,-5.4943148389,0.4438096225,1.6841063032  
 H,0,1.6554546685,-1.7101748453,0.9857349113

H,0,-0.289580344,-2.5750603518,-0.4933611653  
 O,0,1.527045684,0.7116074402,-3.3299423829  
 As,0,2.5012848898,2.0790453885,-3.4279568566  
 O,0,3.1018371631,2.2534362301,-5.1457944918  
 O,0,1.692553574,3.496560283,-3.0163780606  
 O,0,3.9999497029,1.8845145243,-2.6363775349  
 H,0,-0.0592470235,0.3762383672,-2.0908617791  
 H,0,4.0543408218,2.1708246345,-4.9679213065

### LG 1.9 Nuc 2.7

grid1aslg19.7

E(RB+HF-LYP) = -3518.64853511

Zero-point correction= 0.259903  
 (Hartree/Particle)  
 Thermal correction to Energy= 0.282239  
 Thermal correction to Enthalpy= 0.283183  
 Thermal correction to Gibbs Free Energy= 0.205494  
 Sum of electronic and zero-point Energies= -  
 3518.388632  
 Sum of electronic and thermal Energies= -  
 3518.366297  
 Sum of electronic and thermal Enthalpies= -  
 3518.365352  
 Sum of electronic and thermal Free Energies= -  
 3518.443041

|       | E (Thermal) | CV             | S              |
|-------|-------------|----------------|----------------|
|       | KCal/Mol    | Cal/Mol-Kelvin | Cal/Mol-Kelvin |
| Total | 177.107     | 83.458         | 163.510        |

C,0,0.8518625198,1.476059135,-0.2316107481  
 C,0,0.4479791811,0.2631818527,-1.098250799  
 O,0,1.3627573402,-0.7292902011,-1.0145845007  
 C,0,2.6631445163,-0.1860975065,-0.6069181982  
 C,0,2.3786945217,1.1469995783,0.1262245442  
 C,0,3.3377446736,-1.2663795537,0.2171908531  
 O,0,2.5617815365,-1.6756516639,1.3438849369  
 N,0,-1.0269268969,-0.5931905092,-0.2608300177  
 C,0,-1.1226050087,-1.9515369805,-0.2004179397  
 N,0,-2.2520638047,-2.4250967086,0.3186589465  
 C,0,-2.9566210743,-1.2828047578,0.6090955805  
 C,0,-2.2051353145,-0.1406549452,0.2449224358  
 N,0,-2.5856158875,1.1679040598,0.3884584175  
 C,0,-3.7612131629,1.304073721,0.9109553013  
 N,0,-4.5715151013,0.2610987227,1.2979528529  
 C,0,-4.2614337468,-1.1285200924,1.193799135  
 O,0,-5.0854670605,-1.9558310953,1.5856278838  
 O,0,3.3184236599,2.1351847989,-0.1434539776  
 O,0,0.546854065,2.719781814,-0.7400513282  
 H,0,3.5632216083,-2.1357465719,-0.4244483177  
 H,0,4.2864470523,-0.8720082084,0.5991716302  
 H,0,3.2205554265,0.0256646282,-1.526953421  
 H,0,-4.1704380758,2.3004312415,1.0712734998  
 H,0,2.4087464849,0.9606198272,1.2095004512  
 H,0,0.287869735,1.3792683626,0.7047322965  
 H,0,1.0084081532,2.9356185763,-1.63865816  
 H,0,3.5415581374,2.1244363083,-1.147244231  
 H,0,-5.4814192218,0.4512065218,1.6997482795  
 H,0,1.6459558303,-1.6926225197,1.0153619001  
 H,0,-0.3160829206,-2.5731717863,-0.567055834  
 O,0,1.5034146454,0.6046151502,-3.5598498732  
 As,0,2.4370386868,1.9969876176,-3.5017988056  
 O,0,3.1125133759,2.3216010376,-5.1705505538  
 O,0,1.5857791214,3.3747155684,-3.0303435863  
 O,0,3.9113668866,1.8080791539,-2.658354397  
 H,0,0.0194375101,0.4115064021,-2.0849439103  
 H,0,4.0572270778,2.3042366425,-4.9405741859

**LG 1.9 Nuc 2.9**

grid1aslg19.8  
E(RB+HF-LYP) = -3518.65067929

Zero-point correction= 0.259868  
(Hartree/Particle)  
Thermal correction to Energy= 0.282049  
Thermal correction to Enthalpy= 0.282993  
Thermal correction to Gibbs Free Energy= 0.206560  
Sum of electronic and zero-point Energies= -  
3518.390812  
Sum of electronic and thermal Energies= -  
3518.368630  
Sum of electronic and thermal Enthalpies= -  
3518.367686  
Sum of electronic and thermal Free Energies= -  
3518.444119

|       | E (Thermal)<br>KCal/Mol | CV<br>Cal/Mol-Kelvin | S<br>Cal/Mol-Kelvin |
|-------|-------------------------|----------------------|---------------------|
| Total | 176.988                 | 83.059               | 160.867             |

C,0,0.9686130119,1.6214242366,-0.2933951425  
C,0,0.61845107,0.4345059533,-1.2159661614  
O,0,1.5877495336,-0.4804971198,-1.2391378905  
C,0,2.6815749729,-0.1513098133,-0.3241888102  
C,0,2.4897126379,1.3311292175,0.0872628458  
C,0,2.6804077942,-1.167854396,0.8078777331  
O,0,1.5607858978,-1.0685855918,1.6821123949  
N,0,-0.8140630409,-0.5283906128,-0.4217838642  
C,0,-1.0193370929,-1.8254610085,-0.8055030171  
N,0,-2.159503556,-2.3732197628,-0.4020372826  
C,0,-2.7637721455,-1.3498369137,0.2878844243  
C,0,-1.9424831801,-0.1999043967,0.2723684082  
N,0,-2.2143497447,1.004456638,0.8675740864  
C,0,-3.3563862963,1.029710416,1.4757667011  
N,0,-4.229379229,-0.0305529809,1.5440165261  
C,0,-4.0286442654,-1.3235154188,0.9720020011  
O,0,-4.8941891741,-2.1854731004,1.1251758498  
O,0,3.4369282359,2.1815930313,-0.464358844  
O,0,0.6711069979,2.8707133764,-0.7941938893  
H,0,2.7525256935,-2.1839662111,0.3804628137  
H,0,3.5702161053,-1.0069756435,1.4299265846  
H,0,3.5823709325,-0.2422906318,-0.9363284028  
H,0,-3.6806373825,1.9379292985,1.9815181005  
H,0,2.5719445412,1.4165718829,1.1800572664  
H,0,0.3871691969,1.4905801352,0.6266952055  
H,0,1.1207129036,3.0325425742,-1.7181342302  
H,0,3.514315337,1.9602255018,-1.4732649865  
H,0,-5.1065431265,0.0688301114,2.040215905  
H,0,0.7648060761,-1.0638442279,1.1206457637  
H,0,-0.2764901794,-2.3380032033,-1.4035023621  
O,0,1.0520324496,0.6919815671,-4.0717842705  
As,0,2.2346814796,1.8337602232,-3.7557958049  
O,0,3.0831077392,2.2233566102,-5.3310213601  
O,0,1.6511244383,3.2979301309,-3.1420727495  
O,0,3.5952966228,1.2928582969,-2.8695666323  
H,0,0.177906123,0.5889059917,-2.2047595336  
H,0,3.9944830922,2.07534346,-5.025101216

**LG 1.9 Nuc 3.1**

grid1aslg19.9  
E(RB+HF-LYP) = -3518.65066814

Zero-point correction= 0.259542  
(Hartree/Particle)  
Thermal correction to Energy= 0.281847  
Thermal correction to Enthalpy= 0.282791  
Thermal correction to Gibbs Free Energy= 0.205639

Sum of electronic and zero-point Energies= -  
3518.391126  
Sum of electronic and thermal Energies= -  
3518.368821  
Sum of electronic and thermal Enthalpies= -  
3518.367877  
Sum of electronic and thermal Free Energies= -  
3518.445029

|       | E (Thermal)<br>KCal/Mol | CV<br>Cal/Mol-Kelvin | S<br>Cal/Mol-Kelvin |
|-------|-------------------------|----------------------|---------------------|
| Total | 176.862                 | 83.111               | 162.380             |

C,0,0.9560443378,1.6234544883,-0.29321679  
C,0,0.6039102891,0.4327949081,-1.208352801  
O,0,1.5723255769,-0.4796377136,-1.2452366964  
C,0,2.6735794483,-0.1501476901,-0.335579144  
C,0,2.4798346719,1.3307754547,0.0819882839  
C,0,2.6835183602,-1.1709792659,0.7918417814  
O,0,1.568784792,-1.0812909376,1.6737716368  
N,0,-0.8305102321,-0.5296746296,-0.4170985713  
C,0,-1.0337994089,-1.8307015825,-0.7883193274  
N,0,-2.1686511197,-2.3782064228,-0.3702771077  
C,0,-2.7707597621,-1.3507099054,0.3152608813  
C,0,-1.9540830362,-0.1981932394,0.2834272902  
N,0,-2.225898562,1.010729632,0.8689927798  
C,0,-3.3634266074,1.0374973516,1.4855396723  
N,0,-4.2318520251,-0.0252139377,1.5703752873  
C,0,-4.0309808477,-1.3224457164,1.0083233864  
O,0,-4.8923655058,-2.1858186474,1.1744294058  
O,0,3.4214154074,2.1843880012,-0.4716836433  
O,0,0.6621133157,2.8649969219,-0.8097283957  
H,0,2.7595877898,-2.1854376309,0.3614766712  
H,0,3.5756811275,-1.0061992804,1.4093378544  
H,0,3.5667233232,-0.2349203601,-0.9591744855  
H,0,-3.6871089556,1.9493151614,1.9850467663  
H,0,2.5647214711,1.4112138621,1.1751669343  
H,0,0.3765196202,1.5009542785,0.6293295084  
H,0,1.1025871021,3.0023848339,-1.7485384709  
H,0,3.4956754237,1.9582466163,-1.4826461028  
H,0,-5.1057280642,0.0758213349,2.0720465102  
H,0,0.7688143106,-1.0809773499,1.1185057155  
H,0,-0.2941900166,-2.3461461738,-1.3879116235  
O,0,1.1409655038,0.6518046409,-4.2536096833  
As,0,2.2599542163,1.8076277431,-3.8032852877  
O,0,3.1969985718,2.3039955248,-5.298180575  
O,0,1.5985861792,3.2296028125,-3.1647176085  
O,0,3.5850309412,1.2740773742,-2.8571761724  
H,0,0.1480051257,0.5874930167,-2.1880195733  
H,0,4.0902217079,2.1841941466,-4.9324421455

**LG 2.1 Nuc 1.9**

grid1aslg21.1  
E(RB+HF-LYP) = -3518.64517069

Zero-point correction= 0.262263  
(Hartree/Particle)  
Thermal correction to Energy= 0.283544  
Thermal correction to Enthalpy= 0.284488  
Thermal correction to Gibbs Free Energy= 0.211614  
Sum of electronic and zero-point Energies= -  
3518.382908  
Sum of electronic and thermal Energies= -  
3518.361627  
Sum of electronic and thermal Enthalpies= -  
3518.360682  
Sum of electronic and thermal Free Energies= -  
3518.433557

|       | E (Thermal) | CV             | S              |
|-------|-------------|----------------|----------------|
|       | KCal/Mol    | Cal/Mol-Kelvin | Cal/Mol-Kelvin |
| Total | 177.927     | 81.410         | 153.378        |

C,0,0.8374770287,1.6325370572,-0.5475489657  
 C,0,0.5935445004,0.4540124105,-1.5180147701  
 O,0,1.4587437133,-0.5519498889,-1.332306077  
 C,0,2.5907854712,-0.1244712485,-0.5186256573  
 C,0,2.2776965737,1.291527374,0.0338900607  
 C,0,2.7756440705,-1.2002292771,0.5400460769  
 O,0,1.6845244751,-1.2954262438,1.4414069104  
 N,0,-0.7891344446,-0.5626406114,-0.3078032102  
 C,0,-1.0920986592,-1.8045138512,-0.8035112379  
 N,0,-2.2827119528,-2.3248599906,-0.4987905782  
 C,0,-2.8355201732,-1.3422993778,0.2835803232  
 C,0,-1.9160264033,-0.2676432821,0.4025849432  
 N,0,-2.1214197415,0.8826793731,-1.1318209554  
 C,0,-3.2731726754,0.9320738559,1.7182912181  
 N,0,-4.2288954022,-0.0564965342,1.648360007  
 C,0,-4.1114884045,-1.2904218799,0.9374348073  
 O,0,-5.0538370841,-2.0878393171,0.9782624481  
 O,0,3.30078362,2.2207376696,-0.2034291421  
 O,0,0.6011443043,2.9265908194,-0.9974972162  
 H,0,2.9563685806,-2.1682121392,0.0370187898  
 H,0,3.6688562385,-0.9645104123,1.1345476147  
 H,0,3.4511640197,-0.0637166802,-1.1929258197  
 H,0,-3.5420304212,1.7998438325,2.3204181601  
 H,0,2.171532478,1.2302262025,1.1231414043  
 H,0,0.1339339231,-1.4947643752,0.2731050308  
 H,0,1.2034112463,3.2032843268,-1.7437871126  
 H,0,3.6565138848,2.0855068558,-1.1347767924  
 H,0,-5.1091199014,0.0549617586,2.1359910547  
 H,0,0.8694111299,-1.1739832204,0.9112788892  
 H,0,-0.3763866605,-2.3238157116,-1.4321261369  
 O,0,1.2863012415,1.0908560388,-3.168625417  
 As,0,2.62210606,2.1452076475,-3.4189964214  
 O,0,3.012642877,1.9255841899,-5.1754645989  
 O,0,2.1807805681,3.7293503008,-3.1346016841  
 O,0,4.0558110247,1.6094679394,-2.6972516907  
 H,0,-0.2600510216,0.2939522157,-2.1397525382  
 H,0,3.8649603861,1.4645330431,-5.0956774673

### LG 2.1 Nuc 1.9 (b)

grid1aslg21.3  
 E(RB+HF-LYP) = -3518.64517485

|                                              |          |
|----------------------------------------------|----------|
| Zero-point correction=                       | 0.262243 |
| (Hartree/Particle)                           |          |
| Thermal correction to Energy=                | 0.283533 |
| Thermal correction to Enthalpy=              | 0.284477 |
| Thermal correction to Gibbs Free Energy=     | 0.211565 |
| Sum of electronic and zero-point Energies=   | -        |
| 3518.382932                                  |          |
| Sum of electronic and thermal Energies=      | -        |
| 3518.361642                                  |          |
| Sum of electronic and thermal Enthalpies=    | -        |
| 3518.360698                                  |          |
| Sum of electronic and thermal Free Energies= | -        |
| 3518.433610                                  |          |

|       | E (Thermal) | CV             | S              |
|-------|-------------|----------------|----------------|
|       | KCal/Mol    | Cal/Mol-Kelvin | Cal/Mol-Kelvin |
| Total | 177.920     | 81.417         | 153.456        |

C,0,0.8252862964,1.6332756532,-0.5694789988  
 C,0,0.595379712,0.4365335201,-1.5204711471  
 O,0,1.4644696565,-0.5615093602,-1.3090161899  
 C,0,2.5940026444,-0.1074828084,-0.5069308334  
 C,0,2.2653641428,1.3124414849,0.0255651357

C,0,2.794527699,-1.1650991228,0.5668449899  
 O,0,1.7022471771,-1.2641283744,1.466928726  
 N,0,-0.7919428729,-0.5656910492,-0.3035576863  
 C,0,-1.0837239085,-1.818507979,-0.7770155347  
 N,0,-2.2693188326,-2.3446345421,-0.4618236466  
 C,0,-2.8304725828,-1.3534534014,0.3034570492  
 C,0,-1.9208482704,-0.2681921948,0.4022367077  
 N,0,-2.1367495856,0.8932286551,1.1105673758  
 C,0,-3.2884622395,0.9423969912,1.6970476866  
 N,0,-4.2349055947,-0.056301035,1.6459463122  
 C,0,-4.1065222323,-1.3015555098,0.9570779099  
 O,0,-5.0411038623,-2.1071808781,1.0136495243  
 O,0,3.2834193774,2.2463011066,-0.2144214236  
 O,0,0.5789021019,2.917475401,-1.0411514329  
 H,0,2.9909687752,-2.1374756858,0.0785021484  
 H,0,3.682293752,-0.9069063402,1.1599398699  
 H,0,3.4518787524,-0.045607717,-1.1845435437  
 H,0,-3.565195745,1.8184100042,2.2834767097  
 H,0,2.1512593681,1.2636007602,1.1146362184  
 H,0,0.1196217807,1.5029324866,0.2505426088  
 H,0,1.1789241969,3.187704084,-1.7922208431  
 H,0,3.6445748401,2.1080057665,-1.1439111607  
 H,0,-5.1157141093,0.0556862783,2.1323883484  
 H,0,0.8875933315,-1.1611263438,0.932791451  
 H,0,-0.3640272192,-2.3424319013,-1.3972445763  
 O,0,1.3072203446,1.0445809016,-3.1738190453  
 As,0,2.6226812673,2.1205818904,-3.4376303364  
 O,0,3.0258266086,1.874871768,-5.1875259466  
 O,0,2.1498449138,3.7015375939,-3.1878643496  
 O,0,4.0614095642,1.625790156,-2.6972114456  
 H,0,-0.2497683041,0.2607851431,-2.149555947  
 H,0,3.8833035264,1.4258122185,-5.0965385242

### LG 2.1 Nuc 2.1

grid1aslg21.4  
 E(RB+HF-LYP) = -3518.64463080

|                                              |          |
|----------------------------------------------|----------|
| Zero-point correction=                       | 0.261446 |
| (Hartree/Particle)                           |          |
| Thermal correction to Energy=                | 0.283779 |
| Thermal correction to Enthalpy=              | 0.284723 |
| Thermal correction to Gibbs Free Energy=     | 0.207083 |
| Sum of electronic and zero-point Energies=   | -        |
| 3518.383184                                  |          |
| Sum of electronic and thermal Energies=      | -        |
| 3518.360852                                  |          |
| Sum of electronic and thermal Enthalpies=    | -        |
| 3518.359908                                  |          |
| Sum of electronic and thermal Free Energies= | -        |
| 3518.437547                                  |          |

|       | E (Thermal) | CV             | S              |
|-------|-------------|----------------|----------------|
|       | KCal/Mol    | Cal/Mol-Kelvin | Cal/Mol-Kelvin |
| Total | 178.074     | 83.543         | 163.406        |

C,0,0.8202712943,1.6274327987,-0.576522132  
 C,0,0.5609257058,0.4014307355,-1.4740228264  
 O,0,1.4413389581,-0.57073221,-1.3044285177  
 C,0,2.5952203933,-0.1094473048,-0.5290965649  
 C,0,2.2664826852,1.306630344,0.0119167893  
 C,0,2.8331523622,-1.1709768597,0.5313030022  
 O,0,1.7627717528,-1.2911862663,1.4578877748  
 N,0,-0.8614524338,-0.5894246657,-0.2886771045  
 C,0,-1.1406614816,-1.858212492,-0.721068329  
 N,0,-2.3140271185,-2.385242402,-0.3676093089  
 C,0,-2.8766438463,-1.3734738391,0.369861207  
 C,0,-1.983922829,-0.2725287539,0.4171067307  
 N,0,-2.2048852717,0.912345952,1.0814379625  
 C,0,-3.3503110084,0.9684253269,1.6799870351

N,0,-4.2823139941,-0.0446952672,1.6804538214  
 C,0,-4.1454210069,-1.313796769,1.0387368071  
 O,0,-5.0663231722,-2.1296572492,1.1371558839  
 O,0,3.2797234751,2.2400850981,-0.2240419199  
 O,0,0.5728422707,2.8909883002,-1.088796961  
 H,0,3.031198629,-2.1382569733,0.0347640015  
 H,0,3.7287656143,-0.9029897494,1.1065954027  
 H,0,3.4234696136,-0.0373211485,-1.2420868718  
 H,0,-3.6322606434,1.8630985398,2.2344718626  
 H,0,2.152246002,1.2462437633,1.1009780434  
 H,0,0.1211292496,1.5222518025,0.2559539025  
 H,0,1.1863226738,3.1528557088,-1.8429620003  
 H,0,3.6373319673,2.1158114947,-1.1637455641  
 H,0,-5.1588978487,0.074846904,2.1728189146  
 H,0,0.9341179664,-1.2170694002,0.9443210533  
 H,0,-0.422600428,-2.3925556816,-1.334125267  
 O,0,1.3802655225,0.996813209,-3.3136424853  
 As,0,2.6571214853,2.11121753,-3.4779004985  
 O,0,3.2018306509,1.9856450728,-5.2085661845  
 O,0,2.145318227,3.6748254003,-3.1670772981  
 O,0,4.0809406824,1.6417313454,-2.6789797748  
 H,0,-0.2138729005,0.2778880723,-2.2015024191  
 H,0,4.1030512713,1.6516672536,-5.0612320064

### LG 2.1 Nuc 2.3

grid1aslg21.5  
 E(RB+HF-LYP) = -3518.64489080

|                                              |          |
|----------------------------------------------|----------|
| Zero-point correction=                       | 0.260644 |
| (Hartree/Particle)                           |          |
| Thermal correction to Energy=                | 0.282138 |
| Thermal correction to Enthalpy=              | 0.283082 |
| Thermal correction to Gibbs Free Energy=     | 0.208892 |
| Sum of electronic and zero-point Energies=   | -        |
| 3518.384247                                  |          |
| Sum of electronic and thermal Energies=      | -        |
| 3518.362753                                  |          |
| Sum of electronic and thermal Enthalpies=    | -        |
| 3518.361809                                  |          |
| Sum of electronic and thermal Free Energies= | -        |
| 3518.435999                                  |          |

|       | E (Thermal) | CV             | S              |
|-------|-------------|----------------|----------------|
|       | KCal/Mol    | Cal/Mol-Kelvin | Cal/Mol-Kelvin |
| Total | 177.044     | 81.620         | 156.147        |

C,0,0.8228972217,1.6359457148,-0.5755400178  
 C,0,0.5458232879,0.3946189238,-1.442407518  
 O,0,1.4441164048,-0.5527414432,-1.3149036463  
 C,0,2.5963232551,-0.1028065581,-0.5198627255  
 C,0,2.2751691358,1.31997288,0.0075969254  
 C,0,2.8123075534,-1.164818307,0.5435783754  
 O,0,1.7392314139,-1.2670061044,1.470394631  
 N,0,-0.9038747021,-0.602530496,-0.2960800459  
 C,0,-1.1818759313,-1.8722129742,-0.7237717595  
 N,0,-2.3454959827,-2.4012428741,-0.3456657991  
 C,0,-2.8996794369,-1.3885056969,0.3976571183  
 C,0,-2.0147843667,-0.2820491319,0.4256994392  
 N,0,-2.2290087324,0.9049113578,1.086421755  
 C,0,-3.3646662675,0.9576537696,1.7040040253  
 N,0,-4.2902849458,-0.0605612196,1.7256829068  
 C,0,-4.1577823533,-1.3321469853,1.0879871476  
 O,0,-5.0714253983,-2.1525674006,1.2048686627  
 O,0,3.2849385906,2.2460044494,-0.2492626916  
 O,0,0.5757645185,2.8802850748,-1.1255525163  
 H,0,2.9976392963,-2.1364898834,0.0513323832  
 H,0,3.7095632878,-0.9080240548,1.1208353925  
 H,0,3.4261201174,-0.0425963209,-1.2322692197  
 H,0,-3.6419813667,1.853808002,2.2580768104

H,0,2.1665520809,1.2703256344,1.0982589831  
 H,0,0.1287216921,1.5489404941,0.2653793515  
 H,0,1.2011161622,3.1303509505,-1.8878765676  
 H,0,3.6279668115,2.1133792664,-1.2000975481  
 H,0,-5.1590657994,0.0570582202,2.2322235229  
 H,0,0.9107787307,-1.2084972404,0.9559057859  
 H,0,-0.4718567368,-2.403226229,-1.3487245129  
 O,0,1.4249980162,0.9296745575,-3.4992896831  
 As,0,2.6693004989,2.0720223752,-3.539082248  
 O,0,3.3483131814,2.0761285499,-5.2309001352  
 O,0,2.1238084247,3.616640428,-3.1686489368  
 O,0,4.0643865213,1.6087407427,-2.6770308323  
 H,0,-0.1602402812,0.3219022132,-2.2466600045  
 H,0,4.2584305682,1.8043269352,-5.022610648

### LG 2.1 Nuc 2.5

grid1aslg21.6  
 E(RB+HF-LYP) = -3518.64600993

|                                              |          |
|----------------------------------------------|----------|
| Zero-point correction=                       | 0.260020 |
| (Hartree/Particle)                           |          |
| Thermal correction to Energy=                | 0.282304 |
| Thermal correction to Enthalpy=              | 0.283249 |
| Thermal correction to Gibbs Free Energy=     | 0.206209 |
| Sum of electronic and zero-point Energies=   | -        |
| 3518.385990                                  |          |
| Sum of electronic and thermal Energies=      | -        |
| 3518.363705                                  |          |
| Sum of electronic and thermal Enthalpies=    | -        |
| 3518.362761                                  |          |
| Sum of electronic and thermal Free Energies= | -        |
| 3518.439801                                  |          |

|       | E (Thermal) | CV             | S              |
|-------|-------------|----------------|----------------|
|       | KCal/Mol    | Cal/Mol-Kelvin | Cal/Mol-Kelvin |
| Total | 177.149     | 83.385         | 162.144        |

C,0,0.9313488883,1.6646655223,-0.4685497328  
 C,0,0.6245164906,0.4524302469,-1.364419778  
 O,0,1.5576306262,-0.4595774841,-1.3364022151  
 C,0,2.6502212999,-0.1084915951,-0.4111182249  
 C,0,2.4169568299,1.3595257833,0.0292383837  
 C,0,2.6520989443,-1.1436761338,0.7029087528  
 O,0,1.5444910021,-1.0550918785,1.5850813211  
 N,0,-0.8317436045,-0.6071177519,-0.2842994096  
 C,0,-1.1108706028,-1.850045565,-0.7861027813  
 N,0,-2.2888224277,-2.3797003554,-0.4642511568  
 C,0,-2.8525508757,-1.3970370062,0.3134441013  
 C,0,-1.9597294424,-0.3040976574,0.4207430681  
 N,0,-2.1764800827,0.8516423393,1.1318208751  
 C,0,-3.3286052232,0.8881202386,1.7200888539  
 N,0,-4.2645137955,-0.1189781801,1.6677829177  
 C,0,-4.1278016327,-1.3603854336,0.9736039396  
 O,0,-5.0506110902,-2.1761114832,1.0278610051  
 O,0,3.414883624,2.230153472,-0.3928018391  
 O,0,0.6616447827,2.9114775878,-0.9973249843  
 H,0,2.7236890217,-2.1514753283,0.2550008511  
 H,0,3.551903527,-0.9913117369,1.3135780851  
 H,0,3.5489692394,-0.1689949458,-1.0295032386  
 H,0,-3.6115937951,1.7600609205,2.3085754812  
 H,0,2.3987159922,1.4001953192,1.125816413  
 H,0,0.2800915923,1.5498809747,0.4046931505  
 H,0,1.2359233467,3.1356202441,-1.8229917124  
 H,0,3.6252409352,2.0320776615,-1.3785705817  
 H,0,-5.1459883883,-0.0152209122,2.1551275254  
 H,0,0.7357790253,-1.0042876723,1.0354810654  
 H,0,-0.3900346272,-2.3542343843,-1.4201892165  
 O,0,1.1889242378,0.9096428933,-3.7565724295  
 As,0,2.4777077691,1.9842710362,-3.6593044361

O,0,3.216904161,2.1367637489,-5.3221464758  
 O,0,2.0196868174,3.5239388472,-3.148883711  
 O,0,3.8398542834,1.3974574308,-2.8137940474  
 H,0,-0.0179493572,0.4594053139,-2.228195999  
 H,0,4.1223569787,1.8631734895,-5.09575766

## LG 2.1 Nuc 2.7

grid1aslg21.7

E(RB+HF-LYP) = -3518.64781297

Zero-point correction= 0.259640  
 (Hartree/Particle)  
 Thermal correction to Energy= 0.281828  
 Thermal correction to Enthalpy= 0.282773  
 Thermal correction to Gibbs Free Energy= 0.206367  
 Sum of electronic and zero-point Energies= -  
 3518.388173  
 Sum of electronic and thermal Energies= -  
 3518.365985  
 Sum of electronic and thermal Enthalpies= -  
 3518.365040  
 Sum of electronic and thermal Free Energies= -  
 3518.441446

|       | E (Thermal)<br>KCal/Mol | CV<br>Cal/Mol-Kelvin | S<br>Cal/Mol-Kelvin |
|-------|-------------------------|----------------------|---------------------|
| Total | 176.850                 | 83.191               | 160.809             |

C,0,0.9769392033,1.6753893721,-0.4009726588  
 C,0,0.6729807456,0.4817579691,-1.315450929  
 O,0,1.6159299831,-0.4185426213,-1.3143216394  
 C,0,2.6807985707,-0.1023482935,-0.3450734757  
 C,0,2.4772919921,1.3800054997,0.0585479601  
 C,0,2.6081202062,-1.1250506991,0.7788124301  
 O,0,1.4842194583,-0.9818835608,1.6321854432  
 N,0,-0.8311940261,-0.6007767187,-0.3277413618  
 C,0,-1.1251098864,-1.82289629,-0.8691793517  
 N,0,-2.3060408908,-2.348476504,-0.553324346  
 C,0,-2.853559539,-1.3844619714,0.2588723053  
 C,0,-1.9506391568,-0.3036043847,0.3931064948  
 N,0,-2.1472755938,0.8298591505,1.1438779336  
 C,0,-3.2930081272,0.8578813534,1.745013764  
 N,0,-4.2391599675,-0.1377423914,1.669149324  
 C,0,-4.121213027,-1.3578105753,0.9347377666  
 O,0,-5.0497392729,-2.167353579,0.9742974089  
 O,0,3.456161259,2.2262218533,-0.4422680951  
 O,0,0.6979372136,2.91927609,-0.927846795  
 H,0,2.6503847119,-2.1391107752,0.341788248  
 H,0,3.4969655868,-1.0043036497,1.412139659  
 H,0,3.5993846776,-0.2070413341,-0.926499012  
 H,0,-3.5610173926,1.7124854973,2.3649872656  
 H,0,2.5031991873,1.4597751683,1.1533213473  
 H,0,0.3445552867,1.548966953,0.4848378777  
 H,0,1.2108619526,3.1010194774,-1.8139393228  
 H,0,3.589014539,2.0061753361,-1.442787089  
 H,0,-5.1136253971,-0.042723409,2.170706215  
 H,0,0.6872717691,-0.9572568943,1.0644206264  
 H,0,-0.4145990417,-2.3124065657,-1.5256721133  
 O,0,1.1363178975,0.7869513881,-3.9578300369  
 As,0,2.3776520904,1.8926878129,-3.7374064406  
 O,0,3.1967455651,2.1508385722,-5.3497473363  
 O,0,1.8623124734,3.4040508068,-3.1850449166  
 O,0,3.7238207179,1.329630166,-2.8464089294  
 H,0,0.1093820729,0.5426340422,-2.2427098954  
 H,0,4.1101786289,1.9728513286,-5.0669121651

## LG 2.1 Nuc 2.9

grid1aslg21.8

E(RB+HF-LYP) = -3518.64831220

Zero-point correction= 0.259334  
 (Hartree/Particle)  
 Thermal correction to Energy= 0.281596  
 Thermal correction to Enthalpy= 0.282540  
 Thermal correction to Gibbs Free Energy= 0.205833  
 Sum of electronic and zero-point Energies= -  
 3518.388978  
 Sum of electronic and thermal Energies= -  
 3518.366716  
 Sum of electronic and thermal Enthalpies= -  
 3518.365772  
 Sum of electronic and thermal Free Energies= -  
 3518.442479

|       | E (Thermal)<br>KCal/Mol | CV<br>Cal/Mol-Kelvin | S<br>Cal/Mol-Kelvin |
|-------|-------------------------|----------------------|---------------------|
| Total | 176.704                 | 83.176               | 161.444             |

C,0,0.9834620549,1.6752756988,-0.3864404758  
 C,0,0.6803298766,0.484217759,-1.3017278407  
 O,0,1.6220295311,-0.416511104,-1.3089227489  
 C,0,2.6847764662,-0.1068959977,-0.3347365316  
 C,0,2.4900004553,1.3799342125,0.0598121652  
 C,0,2.598866749,-1.1251798591,0.7921404335  
 O,0,1.4658781598,-0.9772228873,1.6336664664  
 N,0,-0.8460639111,-0.5938963822,-0.3437153959  
 C,0,-1.1376048747,-1.8201534264,-0.8761707712  
 N,0,-2.3119987883,-2.3494910948,-0.5440016122  
 C,0,-2.8558780152,-1.3838685522,0.2687896253  
 C,0,-1.9588806286,-0.2968202439,0.3876268229  
 N,0,-2.1539941518,0.8397179054,1.1333813949  
 C,0,-3.293368434,0.86418707,1.7467518431  
 N,0,-4.2339828568,-0.1375011243,1.6869550762  
 C,0,-4.1164862503,-1.3611051235,0.9585319536  
 O,0,-5.0389037754,-2.1762702497,1.0124540413  
 O,0,3.4624460809,2.2175270422,-0.4623193931  
 O,0,0.7010689966,2.9137901367,-0.9180066534  
 H,0,2.6442240552,-2.1413708312,0.3607925724  
 H,0,3.4804978385,-1.0025364888,1.4348012042  
 H,0,3.6038537901,-0.2200530295,-0.9134926611  
 H,0,-3.5596819571,1.7209003003,2.3644213724  
 H,0,2.5272472993,1.4687472247,1.1538104046  
 H,0,0.360333389,1.5472359674,0.505922712  
 H,0,1.1940692323,3.0766070153,-1.8255287497  
 H,0,3.5675414801,1.9897977384,-1.4685495621  
 H,0,-5.1034761637,-0.0447657476,2.1975465723  
 H,0,0.6741901923,-0.9599654801,1.0593068081  
 H,0,-0.4309955539,-2.3092294953,-1.5371341435  
 O,0,1.1664668956,0.7493498057,-4.1483695407  
 As,0,2.3599824573,1.8667515121,-3.7904765389  
 O,0,3.2761370708,2.2331843212,-5.3298876637  
 O,0,1.7872766384,3.3452923978,-3.2000557467  
 O,0,3.6698809346,1.2985327945,-2.8462749069  
 H,0,0.1306421004,0.553486629,-2.2385992311  
 H,0,4.1723580871,2.0629692069,-4.992635141

## LG 2.3 Nuc 1.9

grid1aslg23.1

E(RB+HF-LYP) = -3518.66401238

Zero-point correction= 0.262245  
 (Hartree/Particle)  
 Thermal correction to Energy= 0.284348  
 Thermal correction to Enthalpy= 0.285292  
 Thermal correction to Gibbs Free Energy= 0.207812  
 Sum of electronic and zero-point Energies= -  
 3518.401768

Sum of electronic and thermal Energies= -  
3518.379665  
Sum of electronic and thermal Enthalpies= -  
3518.378720  
Sum of electronic and thermal Free Energies= -  
3518.456200

|       | E (Thermal)<br>KCal/Mol | CV<br>Cal/Mol-Kelvin | S<br>Cal/Mol-Kelvin |
|-------|-------------------------|----------------------|---------------------|
| Total | 178.431                 | 83.117               | 163.070             |

C,0,0.947755997,1.6719597325,-0.5496112726  
C,0,0.6892488297,0.5220142813,-1.538756088  
O,0,1.5238430727,-0.4945542238,-1.3464693075  
C,0,2.6376124772,-0.1221923477,-0.4730521071  
C,0,2.3900794359,1.3276078319,0.0145948939  
C,0,2.6914437294,-1.171132813,0.6288454202  
O,0,1.6000034722,-1.1160686212,1.5252484529  
N,0,-0.7582365349,-0.6302204279,-0.1723240492  
C,0,-1.0781216978,-1.8226429797,-0.7660558069  
N,0,-2.3075971403,-2.3088394934,-0.5750812048  
C,0,-2.8696408455,-1.3560195356,0.2374513538  
C,0,-1.9129510877,-0.3368091857,0.4877020908  
N,0,-2.1145978143,0.7744854722,1.2773757153  
C,0,-3.2993772123,0.8400076407,1.7930432339  
N,0,-4.2896256119,-0.0971204952,1.5988605814  
C,0,-4.180504648,-1.2871933888,0.814298347  
O,0,-5.1573490817,-2.0409822757,0.7475276917  
O,0,3.4312363253,2.2121944097,-0.3038201512  
O,0,0.7029459842,2.9766398825,-0.9629450678  
H,0,2.7771284713,-2.1692068301,0.1591556412  
H,0,3.604695037,-1.0081955561,1.2188827694  
H,0,3.5350149365,-0.1511353682,-1.0978446389  
H,0,-3.5711015075,1.6796524538,2.4328580282  
H,0,2.3150820479,1.3289691721,1.1073500736  
H,0,0.2456402609,1.4897968272,0.2681453138  
H,0,1.2940844896,3.2541662478,-1.7189200278  
H,0,3.7305933671,2.0358054008,-1.2467487606  
H,0,-5.1942166927,0.0241603987,2.0369418753  
H,0,0.7838915237,-0.9956419339,0.984731328  
H,0,-0.3458599416,-2.3329352201,-1.3837758875  
O,0,1.1975267568,1.1364508458,-3.2633191819  
As,0,2.5920074138,2.1297744898,-3.4916109803  
O,0,2.9210871161,1.9520946918,-5.2616872345  
O,0,2.2408783786,3.7225748293,-3.1434222892  
O,0,3.9977497038,1.4842150333,-2.8152629243  
H,0,-0.249875196,0.3110808593,-2.0038523927  
H,0,3.7417506556,1.4319078157,-5.2287872776

### LG 2.3 Nuc 2.1

grid1aslg23.2  
E(RB+HF-LYP) = -3518.65745474

Zero-point correction= 0.261357  
(Hartree/Particle)  
Thermal correction to Energy= 0.283582  
Thermal correction to Enthalpy= 0.284527  
Thermal correction to Gibbs Free Energy= 0.208102  
Sum of electronic and zero-point Energies= -  
3518.396098  
Sum of electronic and thermal Energies= -  
3518.373872  
Sum of electronic and thermal Enthalpies= -  
3518.372928  
Sum of electronic and thermal Free Energies= -  
3518.449353

|  | E (Thermal)<br>KCal/Mol | CV<br>Cal/Mol-Kelvin | S<br>Cal/Mol-Kelvin |
|--|-------------------------|----------------------|---------------------|
|--|-------------------------|----------------------|---------------------|

|       |         |        |         |
|-------|---------|--------|---------|
| Total | 177.951 | 83.314 | 160.849 |
|-------|---------|--------|---------|

C,0,0.9297329673,1.6655896124,-0.5774033347  
C,0,0.6702678946,0.4800077184,-1.5154418271  
O,0,1.516546846,-0.5052606855,-1.3481946134  
C,0,2.6349913935,-0.1180954528,-0.4736962495  
C,0,2.3746557397,1.3345829085,-0.0002395263  
C,0,2.6918280404,-1.1632713947,0.6298542786  
O,0,1.5970760398,-1.1139493147,1.5238122333  
N,0,-0.8073857408,-0.6597091032,-0.1709776794  
C,0,-1.1439170998,-1.8496307898,-0.7591561487  
N,0,-2.3704418591,-2.3287043463,-0.5395218979  
C,0,-2.910903075,-1.3701035502,0.2816834979  
C,0,-1.9474622522,-0.3534135218,0.5082850624  
N,0,-2.127201107,0.7628069821,1.2950198565  
C,0,-3.3012995128,0.8359317249,-0.3161539452  
N,0,-4.2981241482,-0.0987466772,1.6656170596  
C,0,-4.2099656675,-1.2932003946,0.8851970781  
O,0,-5.1898844071,-2.0434655053,0.8410252991  
O,0,3.4094080732,2.2192938013,-0.3161539452  
O,0,0.6776058377,2.9484082948,-1.0361215228  
H,0,2.787250184,-2.1624015315,0.1651799412  
H,0,3.6007422915,-0.9898587948,1.2224927179  
H,0,3.5225407051,-0.1445401916,-1.1119371693  
H,0,-3.5567325955,1.6804762845,2.4737282308  
H,0,2.2874115336,1.3391947088,1.0920282315  
H,0,0.2261737122,1.503379794,0.2460016375  
H,0,1.2841753779,3.219097296,-1.7944845016  
H,0,3.7079958114,2.0508723089,-1.2677420602  
H,0,-5.1933361772,0.0290616408,2.1208692968  
H,0,0.7778009201,-1.0175459992,0.9855041349  
H,0,-0.4267628754,-2.3649806864,-1.3905599569  
O,0,1.2726227319,1.0801764487,-3.4355888163  
As,0,2.627017179,2.1173834284,-3.5420675752  
O,0,3.1241955798,2.0516646299,-5.2864087362  
O,0,2.2253491839,3.6910575571,-3.1391003922  
O,0,4.0175019458,1.5030470747,-2.7926868549  
H,0,-0.2108236069,0.3016753575,-2.0960138259  
H,0,3.9935946062,1.6278379878,-5.1870899427

### LG 2.3 Nuc 2.3

grid1aslg23.3  
E(RB+HF-LYP) = -3518.65320765

Zero-point correction= 0.260471  
(Hartree/Particle)  
Thermal correction to Energy= 0.282789  
Thermal correction to Enthalpy= 0.283733  
Thermal correction to Gibbs Free Energy= 0.206927  
Sum of electronic and zero-point Energies= -  
3518.392737  
Sum of electronic and thermal Energies= -  
3518.370418  
Sum of electronic and thermal Enthalpies= -  
3518.369474  
Sum of electronic and thermal Free Energies= -  
3518.446281

|       | E (Thermal)<br>KCal/Mol | CV<br>Cal/Mol-Kelvin | S<br>Cal/Mol-Kelvin |
|-------|-------------------------|----------------------|---------------------|
| Total | 177.453                 | 83.423               | 161.652             |

C,0,0.9276839912,1.6607009896,-0.5742173597  
C,0,0.6604591641,0.4561362346,-1.4801849171  
O,0,1.5282634884,-0.499877136,-1.3557973714  
C,0,2.6430404082,-0.114386734,-0.4642821937  
C,0,2.3824135927,1.3427756077,-0.005685505  
C,0,2.6827269272,-1.1569903468,0.6417947267  
O,0,1.5883418377,-1.093394249,1.5355413638



N,O,-0.8335807643,-0.6899162318,-0.1594244031  
 C,O,-1.1828858846,-1.8746460198,-0.7500647849  
 N,O,-2.4106568246,-2.3428442351,-0.5198640241  
 C,O,-2.9372752013,-1.3794427442,0.3055840678  
 C,O,-1.9666410171,-0.3698727196,0.5256679684  
 N,O,-2.1306225588,0.7480281483,1.3120519526  
 C,O,-3.3007555064,0.831051373,1.8585158697  
 N,O,-4.3053539618,-0.0961783963,1.6980837748  
 C,O,-4.231979084,-1.2920351426,0.9182986218  
 O,O,-5.2168083416,-2.0351495768,0.8810527151  
 O,O,3.4069965792,2.2241077439,-0.3435191124  
 O,O,0.6659801354,2.9245157846,-1.0680695986  
 H,O,2.7696469794,-2.1586765202,0.1814979939  
 H,O,3.5918718201,-0.9901278662,1.235453196  
 H,O,3.5294100475,-0.1494646088,-1.1032093515  
 H,O,-3.5451227902,-1.6784435061,2.4985697734  
 H,O,2.3029092499,1.3572492929,1.0875095714  
 H,O,0.2324758019,1.5119303209,0.2605314044  
 H,O,1.2757184651,3.1850027878,-1.8420575609  
 H,O,3.6872572385,2.0533229557,-1.3079427804  
 H,O,-5.196730469,0.0396237314,2.1586052487  
 H,O,0.7660433016,-1.0169333346,0.9996855529  
 H,O,-0.4748346076,-2.3939606659,-1.3883856447  
 O,O,1.3050803274,1.0189473067,-3.6150636381  
 As,O,2.6217161538,2.0868496159,-3.6008702881  
 O,O,3.2587294766,2.142438614,-5.3042577406  
 O,O,2.1761609937,3.6378519888,-3.1370551018  
 O,O,3.9936566889,1.4900994764,-2.7924299568  
 H,O,-0.1588774752,0.3185313291,-2.1576595313  
 H,O,4.1577862879,1.8109573404,-5.1387367774

### LG 2.3 Nuc 2.5

grid1aslg23.4  
 E(RB+HF-LYP) = -3518.65100951

Zero-point correction= 0.259896  
 (Hartree/Particle)  
 Thermal correction to Energy= 0.282216  
 Thermal correction to Enthalpy= 0.283160  
 Thermal correction to Gibbs Free Energy= 0.206361  
 Sum of electronic and zero-point Energies= -  
 3518.391114  
 Sum of electronic and thermal Energies= -  
 3518.368794  
 Sum of electronic and thermal Enthalpies= -  
 3518.367850  
 Sum of electronic and thermal Free Energies= -  
 3518.444649

|       | E (Thermal)<br>KCal/Mol | CV<br>Cal/Mol-Kelvin | S<br>Cal/Mol-Kelvin |
|-------|-------------------------|----------------------|---------------------|
| Total | 177.093                 | 83.427               | 161.637             |

C,O,0.9667569586,1.6800955274,-0.524571214  
 C,O,0.6779823455,0.4814006109,-1.4266285534  
 O,O,1.5656054886,-0.4522637608,-1.3636715297  
 C,O,2.6678608895,-0.105004549,-0.4352980551  
 C,O,2.439215775,1.3637279106,0.0035694159  
 C,O,2.6448318824,-1.142716516,0.6767084316  
 O,O,1.5484136615,-1.02396518,1.5624279853  
 N,O,-0.8448433185,-0.694532074,-0.1663962722  
 C,O,-1.1908574401,-1.8741545042,-0.7685951065  
 N,O,-2.4159129735,-2.3461490791,-0.5366264738  
 C,O,-2.942578646,-1.390299525,0.2980974183  
 C,O,-1.9769131798,-0.3781703973,0.5222768928  
 N,O,-2.1409557612,0.7337356599,1.3159930135  
 C,O,-3.3103867187,0.8095437663,1.8653790065  
 N,O,-4.3118019011,-0.1201545104,1.7018156093  
 C,O,-4.2356725735,-1.3122368756,0.9164695907

O,O,-5.2170511404,-2.0588871191,0.8769763998  
 O,O,3.4531498904,2.2263104952,-0.39494477  
 O,O,0.6990880625,2.935263172,-1.0305488467  
 H,O,2.6911518592,-2.149941429,0.2234335903  
 H,O,3.5543572619,-1.0138825876,1.2788680792  
 H,O,3.5632528451,-0.1750970212,-1.057013924  
 H,O,-3.5561904938,1.6526560623,2.5103133706  
 H,O,2.3971087124,1.4003407541,1.0986534986  
 H,O,0.293374129,1.5333524502,0.3298138762  
 H,O,1.2876143594,3.1697203753,-1.843191487  
 H,O,3.6743497522,2.0341040362,-1.3767865376  
 H,O,-5.2025735305,0.0099341981,2.1652148335  
 H,O,0.7275238327,-0.9712575149,1.0219636343  
 H,O,-0.4834263182,-2.3843942902,-1.4145816693  
 O,O,1.2478031646,0.9663689025,-3.8120238137  
 As,O,2.5541702034,2.0203346177,-3.6691020671  
 O,O,3.3071043359,2.1880803644,-5.320805781  
 O,O,2.1118034777,3.5569798383,-3.1396455414  
 O,O,3.8896658408,1.3913805821,-2.8150011217  
 H,O,-0.0792200568,0.4052069724,-2.185180449  
 H,O,4.2084437938,1.8992382578,-5.0976952731

### LG 2.3 Nuc 2.7

grid1aslg23.5  
 E(RB+HF-LYP) = -3518.65015452

Zero-point correction= 0.259273  
 (Hartree/Particle)  
 Thermal correction to Energy= 0.281601  
 Thermal correction to Enthalpy= 0.282546  
 Thermal correction to Gibbs Free Energy= 0.205701  
 Sum of electronic and zero-point Energies= -  
 3518.390882  
 Sum of electronic and thermal Energies= -  
 3518.368553  
 Sum of electronic and thermal Enthalpies= -  
 3518.367609  
 Sum of electronic and thermal Free Energies= -  
 3518.444454

|       | E (Thermal)<br>KCal/Mol | CV<br>Cal/Mol-Kelvin | S<br>Cal/Mol-Kelvin |
|-------|-------------------------|----------------------|---------------------|
| Total | 176.708                 | 83.395               | 161.733             |

C,O,0.9841435256,1.6859449117,-0.4835014919  
 C,O,0.7048804043,0.4939272374,-1.3919547186  
 O,O,1.6108475762,-0.4190770675,-1.3608013769  
 C,O,2.6874535337,-0.0942932712,-0.3930094216  
 C,O,2.4692520405,1.3823477857,0.0243204098  
 C,O,2.6145326965,-1.1284633541,0.720417809  
 O,O,1.501796126,-0.9862532039,1.5814032346  
 N,O,-0.8549310782,-0.7042797098,-0.1997797424  
 C,O,-1.2190980546,-1.8673828192,-0.8226004009  
 N,O,-2.4453258082,-2.3304595145,-0.5823602855  
 C,O,-2.9521217327,-1.3845681206,0.2761505642  
 C,O,-1.9756252897,-0.3855227574,0.5068167995  
 N,O,-2.1174285933,0.7119181142,1.323766681  
 C,O,-3.278322582,0.7873462219,1.8911508942  
 N,O,-4.290017452,-0.1300740979,1.7238785797  
 C,O,-4.2355899277,-1.3075739977,0.9151712451  
 O,O,-5.2221509186,-2.0468255511,0.8479606045  
 O,O,3.4667709869,2.2346740927,-0.4243524725  
 O,O,0.709336277,2.9302816042,-1.0073462878  
 H,O,2.6523125574,-2.1374362958,0.2705160473  
 H,O,3.5123908882,-1.0162500734,1.3430168075  
 H,O,3.5978289705,-0.1869120219,-0.9885473835  
 H,O,-3.5069093255,1.6197658661,2.5558557681  
 H,O,2.4521879145,1.4423580665,1.1194593088  
 H,O,0.3222612825,1.540289188,0.3799860939

H,0,1.2671840873,3.1365615182,-1.8622104154  
 H,0,3.637677165,2.0249566284,-1.418998497  
 H,0,-5.1722879862,-0.0022069227,2.2038994168  
 H,0,0.6910601033,-0.9585507834,1.0245230976  
 H,0,-0.5251542274,-2.3712346699,-1.4877614827  
 O,0,1.2390376996,0.879380658,-4.0103688948  
 As,0,2.4965106621,1.9567321812,-3.7381393809  
 O,0,3.3609741031,2.2242680365,-5.3225328071  
 O,0,1.9972207354,3.4688546647,-3.1755367019  
 O,0,3.8012379273,1.3447155299,-2.8197236612  
 H,0,0.020993113,0.4656162154,-2.2277795397  
 H,0,4.2593170701,1.9920933317,-5.0313222801

### LG 2.3 Nuc 2.9

grid1aslg23.6

E(RB+HF-LYP) = -3518.64932848

Zero-point correction= 0.258702  
 (Hartree/Particle)  
 Thermal correction to Energy= 0.281103  
 Thermal correction to Enthalpy= 0.282047  
 Thermal correction to Gibbs Free Energy= 0.204661  
 Sum of electronic and zero-point Energies= -  
 3518.390626  
 Sum of electronic and thermal Energies= -  
 3518.368225  
 Sum of electronic and thermal Enthalpies= -  
 3518.367281  
 Sum of electronic and thermal Free Energies= -  
 3518.444668

|       | E (Thermal)<br>KCal/Mol | CV<br>Cal/Mol-Kelvin | S<br>Cal/Mol-Kelvin |
|-------|-------------------------|----------------------|---------------------|
| Total | 176.395                 | 83.347               | 162.874             |

C,0,1.0059672361,1.6853036686,-0.4442208946  
 C,0,0.7293219797,0.5031789767,-1.3610288719  
 O,0,1.6410731892,-0.4031074968,-1.3511279638  
 C,0,2.705196644,-0.0968236453,-0.363176039  
 C,0,2.5037819625,1.3875233965,0.0362460691  
 C,0,2.59361227,-1.1229748014,0.7548596417  
 O,0,1.4696221475,-0.9544678763,1.5964790595  
 N,0,-0.8641540591,-0.7044501284,-0.2241653427  
 C,0,-1.2361112939,-1.8615500045,-0.8530915107  
 N,0,-2.4613075769,-2.3217693471,-0.6042280154  
 C,0,-2.9579533231,-1.3796102833,0.2645409578  
 C,0,-1.9777484087,-0.3844830185,0.4934108511  
 N,0,-2.1087206185,0.7080606783,1.3180996933  
 C,0,-3.2643429039,0.7829006144,1.8962998987  
 N,0,-4.2795167619,-0.1310621337,1.7326154464  
 C,0,-4.2355313685,-1.3034887724,0.9159893943  
 O,0,-5.2236565983,-2.0404071759,0.883277054  
 O,0,3.4873789469,2.2273278186,-0.457201686  
 O,0,0.7232855955,2.92393839,-0.9707575133  
 H,0,2.6203381438,-2.1352789799,0.3121779644  
 H,0,3.4823306453,-1.0237045516,1.3924470981  
 H,0,3.6233901233,-0.2121184497,-0.9421870605  
 H,0,-3.484732666,1.6119189347,2.5678974235  
 H,0,2.5136504702,1.4668164993,1.1305884457  
 H,0,0.3604940995,1.5335988509,0.4306466147  
 H,0,1.2384858533,3.0979007279,-1.8698880657  
 H,0,3.6147453824,2.0064066829,-1.461676379  
 H,0,-5.1571897262,-0.0038198298,2.2211871085  
 H,0,0.6661977568,-0.9413329071,1.0292092944  
 H,0,-0.5494591398,-2.3623642324,-1.5278519465  
 O,0,1.2607071461,0.7969937329,-4.1967459743  
 As,0,2.4506800829,1.9055858319,-3.8021461426  
 O,0,3.3943634361,2.2919162218,-5.3168162636

O,0,1.8735667377,3.3790403964,-3.2017359562  
 O,0,3.7349444531,1.3155043615,-2.8376974397  
 H,0,0.0837180659,0.5041856742,-2.2320331075  
 H,0,4.2858165471,2.1193797967,-4.9685296822

### LG 2.3 Nuc 3.1

grid1aslg23.7

E(RB+HF-LYP) = -3518.64822281

Zero-point correction= 0.258326  
 (Hartree/Particle)  
 Thermal correction to Energy= 0.280844  
 Thermal correction to Enthalpy= 0.281788  
 Thermal correction to Gibbs Free Energy= 0.202670  
 Sum of electronic and zero-point Energies= -  
 3518.389897  
 Sum of electronic and thermal Energies= -  
 3518.367379  
 Sum of electronic and thermal Enthalpies= -  
 3518.366435  
 Sum of electronic and thermal Free Energies= -  
 3518.445552

|       | E (Thermal)<br>KCal/Mol | CV<br>Cal/Mol-Kelvin | S<br>Cal/Mol-Kelvin |
|-------|-------------------------|----------------------|---------------------|
| Total | 176.232                 | 83.287               | 166.517             |

C,0,1.0077553479,1.6877198877,-0.421355796  
 C,0,0.7275242917,0.5130180929,-1.3424370105  
 O,0,1.6410974228,-0.3888841676,-1.3571275985  
 C,0,2.7078913266,-0.0962476245,-0.3656699568  
 C,0,2.5132166133,1.3879609005,0.0394207563  
 C,0,2.5890258994,-1.1274593926,0.7466860885  
 O,0,1.4682963405,-0.9539203654,1.5918665127  
 N,0,-0.8736469523,-0.7037136151,-0.2262769875  
 C,0,-1.2471387422,-1.8642471742,-0.8479739727  
 N,0,-2.4702191017,-2.3242080993,-0.5895161343  
 C,0,-2.9633682586,-1.3779180977,0.2768180593  
 C,0,-1.9837635269,-0.3803438767,0.4954197206  
 N,0,-2.1114549757,0.7164093906,1.3147197671  
 C,0,-3.2641975142,0.7930284717,1.8984779027  
 N,0,-4.2790234081,-0.1229231117,1.744916722  
 C,0,-4.2380075402,-1.2995261245,0.9341322023  
 O,0,-5.2252791693,-2.0375551911,0.9098053527  
 O,0,3.4860124094,2.2272469837,-0.4707509996  
 O,0,0.7256084826,2.9228668082,-0.9520757646  
 H,0,2.6066379956,-2.1377391471,0.2993983386  
 H,0,3.4798324795,-1.0383830945,1.3827889504  
 H,0,3.6239894368,-0.2146527994,-0.947176771  
 H,0,-3.4819345841,1.6253680494,2.5667575199  
 H,0,2.5379107436,1.4653799844,1.1339617272  
 H,0,0.3714018752,1.5361563127,0.4601469693  
 H,0,1.2093842215,3.0626324224,-1.8813166404  
 H,0,3.5949477152,2.0022967562,-1.4816506134  
 H,0,-5.154496885,0.0062862073,2.2369304792  
 H,0,0.6629239965,-0.9413827114,1.0279137666  
 H,0,-0.563629896,-2.3675464777,-1.5240292251  
 O,0,1.3539934204,0.7109037194,-4.3720203133  
 As,0,2.4496952809,1.8587103685,-3.8541341942  
 O,0,3.4674427202,2.3699094501,-5.2833157281  
 O,0,1.7644323285,3.279313238,-3.2335793077  
 O,0,3.7104025213,1.3049636577,-2.834554027  
 H,0,0.0781991869,0.5246409347,-2.2121129747  
 H,0,4.3407829682,2.2465070543,-4.8734206598

### LG 2.5 Nuc 1.9

grid1aslg25.1

E(RB+HF-LYP) = -3518.67824072

Zero-point correction= 0.262156  
 (Hartree/Particle)  
 Thermal correction to Energy= 0.284232  
 Thermal correction to Enthalpy= 0.285176  
 Thermal correction to Gibbs Free Energy= 0.209059  
 Sum of electronic and zero-point Energies= -  
 3518.416085  
 Sum of electronic and thermal Energies= -  
 3518.394009  
 Sum of electronic and thermal Enthalpies= -  
 3518.393065  
 Sum of electronic and thermal Free Energies= -  
 3518.469182

|       | E (Thermal)<br>KCal/Mol | CV<br>Cal/Mol-Kelvin | S<br>Cal/Mol-Kelvin |
|-------|-------------------------|----------------------|---------------------|
| Total | 178.358                 | 83.000               | 160.202             |

C,0,1.0455622813,1.7119323809,-0.5426932901  
 C,0,0.7714665083,0.6086390501,-1.5715700187  
 O,0,1.543251471,-0.4484564604,-1.3580598207  
 C,0,2.6601646565,-0.1359718792,-0.4608056551  
 C,0,2.467218541,1.3195161488,0.03235731  
 C,0,2.6343983525,-1.1942052027,0.63401152  
 O,0,1.5364068842,-1.0810289927,1.5130281096  
 N,0,-0.8307909935,-0.6681127519,-0.1388552957  
 C,0,-1.1649586891,-1.8019530024,-0.8270657943  
 N,0,-2.4121652209,-2.2668227367,-0.701915781  
 C,0,-2.9691368457,-1.3604523682,0.1653463508  
 C,0,-1.9918940922,-0.3892080158,0.5119697456  
 N,0,-2.1833855418,0.6695217442,1.3737073094  
 C,0,-3.378413689,0.7303227351,1.8661210688  
 N,0,-4.3875119267,-0.1634313867,1.5832592717  
 C,0,-4.2910126722,-1.2966068928,0.716694421  
 O,0,-5.2859802188,-2.0160283631,0.5751327954  
 O,0,3.5394899601,2.1697107189,-0.2776794868  
 O,0,0.828048434,3.036086754,-0.904337269  
 H,0,2.6720502817,-2.1916651235,0.1563844865  
 H,0,3.5467407564,-1.0877812061,1.2385539027  
 H,0,3.5678306419,-0.2064805365,-1.0669382466  
 H,0,-3.6446695587,1.5297820555,2.5578315121  
 H,0,2.3854304917,1.3199937147,1.1243193089  
 H,0,0.3229144018,1.4936812712,0.2524436574  
 H,0,1.4282861754,3.3186831607,-1.6522352607  
 H,0,3.8284970993,1.9967773464,-1.2232073085  
 H,0,-5.2989347609,-0.0492639832,2.0088961284  
 H,0,0.7231084731,-0.961794853,0.962423465  
 H,0,-0.4300582115,-2.2876241125,-1.4616880907  
 O,0,1.2639841744,1.2086456703,-3.3057603481  
 As,0,2.6906923486,2.1763406729,-3.4724666954  
 O,0,3.0235739564,2.0579402492,-5.2445928293  
 O,0,2.3799732966,3.7637650443,-3.068619483  
 O,0,4.0624111679,1.4574883864,-2.8050676035  
 H,0,-0.206039157,0.4082385339,-1.9648080055  
 H,0,3.8156956942,1.4944898498,-5.2344479205

### LG 2.5 Nuc 2.1

grid1aslg25.2  
 E(RB+HF-LYP) = -3518.66829445

Zero-point correction= 0.261283  
 (Hartree/Particle)  
 Thermal correction to Energy= 0.283455  
 Thermal correction to Enthalpy= 0.284399  
 Thermal correction to Gibbs Free Energy= 0.208047  
 Sum of electronic and zero-point Energies= -  
 3518.407012  
 Sum of electronic and thermal Energies= -  
 3518.384839

Sum of electronic and thermal Enthalpies= -  
 3518.383895  
 Sum of electronic and thermal Free Energies= -  
 3518.460248

|       | E (Thermal)<br>KCal/Mol | CV<br>Cal/Mol-Kelvin | S<br>Cal/Mol-Kelvin |
|-------|-------------------------|----------------------|---------------------|
| Total | 177.871                 | 83.138               | 160.698             |

C,0,1.0339826689,1.6968924861,-0.5493877037  
 C,0,0.7522423103,0.5623996815,-1.5338172274  
 O,0,1.5408776012,-0.4633382508,-1.3576287643  
 C,0,2.6664846209,-0.1394242962,-0.4585613799  
 C,0,2.4672835733,1.3194521058,0.0201541517  
 C,0,2.6423214106,-1.1945754223,0.6380885215  
 O,0,1.5547888392,-1.0736266406,1.5283876816  
 N,0,-0.8454978393,-0.7167420595,-0.0981913575  
 C,0,-1.1949699366,-1.8458449261,-0.7864594251  
 N,0,-2.4495810784,-2.2889667108,-0.6640132084  
 C,0,-2.9947302684,-1.370064297,0.1979775689  
 C,0,-2.004626046,-0.4137613378,0.5458058523  
 N,0,-2.1820250841,0.6527550988,1.3999935765  
 C,0,-3.3792996179,0.7375269862,1.8837198307  
 N,0,-4.4013303438,-0.140736477,1.6000513461  
 C,0,-4.3192254359,-1.2802802724,0.7404272762  
 O,0,-5.3248511644,-1.9829656026,0.5951711929  
 O,0,3.5300080822,2.16838926,-0.3020873146  
 O,0,0.7985524851,3.0026990114,-0.9435465969  
 H,0,2.6721198435,-2.193577973,0.1636197339  
 H,0,3.560986491,-1.0892861016,1.2326084649  
 H,0,3.5627903097,-0.2119682912,-1.0799772629  
 H,0,-3.6361777079,1.5461606057,2.5680178789  
 H,0,2.3875021105,1.3259854349,1.1125555696  
 H,0,0.3211271049,1.4870830634,0.2595232164  
 H,0,1.405089641,3.2850550716,-1.6994847456  
 H,0,3.8025638653,2.006592826,-1.2619467432  
 H,0,-5.3141404198,-0.0063930347,2.0168014365  
 H,0,0.7301579797,-0.977384074,0.9899182139  
 H,0,-0.4666606135,-2.3451786927,-1.4182997829  
 O,0,1.2901317271,1.1745835519,-3.4692510936  
 As,0,2.6826328242,2.1728595494,-3.5225320399  
 O,0,3.1647921436,2.1687052805,-5.2692588706  
 O,0,2.3340765384,3.739162206,-3.049677832  
 O,0,4.0452485261,1.470809541,-2.8044089629  
 H,0,-0.1813883299,0.387185548,-2.0318346269  
 H,0,4.0109876592,1.6944847722,-5.202790414

### LG 2.5 Nuc 2.3

grid1aslg25.3  
 E(RB+HF-LYP) = -3518.66111441

Zero-point correction= 0.260368  
 (Hartree/Particle)  
 Thermal correction to Energy= 0.282667  
 Thermal correction to Enthalpy= 0.283611  
 Thermal correction to Gibbs Free Energy= 0.206755  
 Sum of electronic and zero-point Energies= -  
 3518.400747  
 Sum of electronic and thermal Energies= -  
 3518.378447  
 Sum of electronic and thermal Enthalpies= -  
 3518.377503  
 Sum of electronic and thermal Free Energies= -  
 3518.454359

|       | E (Thermal)<br>KCal/Mol | CV<br>Cal/Mol-Kelvin | S<br>Cal/Mol-Kelvin |
|-------|-------------------------|----------------------|---------------------|
| Total | 177.376                 | 83.330               | 161.757             |

C,0,1.0167571605,1.6831932045,-0.5512518665  
 C,0,0.7393304214,0.5276286113,-1.5047812112  
 O,0,1.5531483708,-0.4661295683,-1.3659641588  
 C,0,2.6732994415,-0.1347165157,-0.4515224726  
 C,0,2.4597332812,1.326178441,0.0165172423  
 C,0,2.6445749087,-1.1896584172,0.6448349039  
 O,0,1.5553402554,-1.0716600366,1.5336324652  
 N,0,-0.8572683515,-0.7638039518,-0.0789231416  
 C,0,-1.2289569864,-1.8837424766,-0.7705470069  
 N,0,-2.4908666016,-2.3022882031,-0.6447275129  
 C,0,-3.0163551388,-1.3737509545,0.2197053919  
 C,0,-2.0090373036,-0.4367555609,0.5667067629  
 N,0,-2.1632698381,0.6327903832,1.4208030535  
 C,0,-3.3582761489,0.7412256236,1.9057874086  
 N,0,-4.3969781912,-0.1173631925,1.6239893563  
 C,0,-4.3381857584,-1.258894652,0.7649927177  
 O,0,-5.3562650427,-1.9427997895,0.6216292862  
 O,0,3.5079369931,2.1807424038,-0.3183792452  
 O,0,0.764670167,2.9726689913,-0.9757740287  
 H,0,2.6799231524,-2.1890753316,0.1721319723  
 H,0,3.5611067646,-1.0799748011,1.2412589183  
 H,0,3.566764963,-0.2037925647,-1.0766733591  
 H,0,-3.5984238284,1.5553849714,2.589372919  
 H,0,2.3811670788,1.3367093426,1.1092719533  
 H,0,0.3098278952,1.4793235994,0.2665149875  
 H,0,1.3703715384,3.2480825476,-1.748496131  
 H,0,3.7661937978,2.021123287,-1.2893686826  
 H,0,-5.3065082291,0.0350419256,2.0417611568  
 H,0,0.7261956398,-1.0000838519,0.9986270045  
 H,0,-0.5122876825,-2.3956526554,-1.4058264147  
 O,0,1.3180989266,1.1171689486,-3.651282193  
 As,0,2.6688261597,2.1463244294,-3.5739860759  
 O,0,3.3035219312,2.2600241154,-5.2724049472  
 O,0,2.2678299238,3.6873819368,-3.0438290429  
 O,0,4.013393091,1.4648582188,-2.7913132788  
 H,0,-0.140632286,0.3784600608,-2.1015410138  
 H,0,4.187543995,1.8804991012,-5.1312795565

## LG 2.5 Nuc 2.5

grid1aslg25.4

E(RB+HF-LYP) = -3518.65645001

Zero-point correction= 0.259715  
 (Hartree/Particle)  
 Thermal correction to Energy= 0.282038  
 Thermal correction to Enthalpy= 0.282982  
 Thermal correction to Gibbs Free Energy= 0.206111  
 Sum of electronic and zero-point Energies= -  
 3518.396735  
 Sum of electronic and thermal Energies= -  
 3518.374412  
 Sum of electronic and thermal Enthalpies= -  
 3518.373468  
 Sum of electronic and thermal Free Energies= -  
 3518.450339

|       | E (Thermal) | CV             | S              |
|-------|-------------|----------------|----------------|
| Total | KCal/Mol    | Cal/Mol-Kelvin | Cal/Mol-Kelvin |
|       | 176.981     | 83.393         | 161.788        |

C,0,1.0146814101,1.6928064616,-0.5358140801  
 C,0,0.7334094925,0.5325763986,-1.4775418526  
 O,0,1.5673221409,-0.4379670356,-1.3857615923  
 C,0,2.6759236715,-0.1241812996,-0.441137137  
 C,0,2.4670741469,1.3392922636,0.0205790848  
 C,0,2.6211922046,-1.1824742043,0.6503712327  
 O,0,1.5369970706,-1.0484511375,1.5425739847  
 N,0,-0.8680437514,-0.7803807422,-0.0770088955  
 C,0,-1.246410414,-1.8979105212,-0.7693032268

N,0,-2.5076313942,-2.3131500577,-0.6336726592  
 C,0,-3.0250393071,-1.3836249536,0.2350513981  
 C,0,-2.0151602654,-0.448113441,0.5750045647  
 N,0,-2.1605283064,0.621452667,1.4299111151  
 C,0,-3.3518822694,0.7316878965,1.9237653275  
 N,0,-4.393386676,-0.1257203828,1.6501659147  
 C,0,-4.3424893798,-1.2678766655,0.7914469367  
 O,0,-5.3612293402,-1.9517683013,0.6569043935  
 O,0,3.5060777846,2.1896119056,-0.339244424  
 O,0,0.7641945511,2.9698677822,-0.9900290466  
 H,0,2.6395973675,-2.1808064693,0.1748400032  
 H,0,3.5404310674,-1.0908070246,1.2455618222  
 H,0,3.5720211174,-0.2018642943,-1.0605052647  
 H,0,-3.5856459186,1.5465422952,2.6085537531  
 H,0,2.4004261436,1.3558685524,1.1142587456  
 H,0,0.3143171499,1.5015761049,0.2912664345  
 H,0,1.3698995592,3.2272861257,-1.784427801  
 H,0,3.7365598652,2.0178453939,-1.3210414598  
 H,0,-5.299213608,0.0273271153,2.0757359377  
 H,0,0.7045402515,-0.9902114914,1.0112093545  
 H,0,-0.5355537927,-2.4104345402,-1.4105329796  
 O,0,1.3163543286,1.0878199752,-3.8443714221  
 As,0,2.6471895623,2.1053784129,-3.6323425819  
 O,0,3.4276634677,2.3107102307,-5.2636044277  
 O,0,2.2273105785,3.6298831073,-3.0545539521  
 O,0,3.944818989,1.4071435809,-2.7775264682  
 H,0,-0.0881846632,0.42803744,-2.1647116948  
 H,0,4.3146416356,1.9776964724,-5.0444028771

## LG 2.5 Nuc 2.7

grid1aslg25.5

E(RB+HF-LYP) = -3518.65364310

C,0,1.02139284,1.6949772532,-0.5100840698  
 C,0,0.7514530884,0.534882834,-1.4476323274  
 O,0,1.6072860474,-0.4122684332,-1.3871722904  
 C,0,2.6922455475,-0.1121115228,-0.4093000226  
 C,0,2.4851245366,1.3574767477,0.0354263105  
 C,0,2.5973642739,-1.1673448611,0.6832792446  
 O,0,1.4955113769,-1.016419286,1.5504985604  
 N,0,-0.882984121,-0.8019269765,-0.1091458095  
 C,0,-1.2849507227,-1.90228583,-0.8154635696  
 N,0,-2.5485363636,-2.3035574356,-0.6656733786  
 C,0,-3.0411278761,-1.3812680317,0.2253263259  
 C,0,-2.0162314149,-0.4628325522,0.5636443403  
 N,0,-2.1342184292,0.5948160092,1.4368754428  
 C,0,-3.3161598758,0.7112367349,1.9516372067  
 N,0,-4.3714374034,-0.1301897765,1.6824673638  
 C,0,-4.34781365,-1.2598363787,0.8062015103  
 O,0,-5.3755517225,-1.9308443839,0.6789203163  
 O,0,3.5089358255,2.2039096572,-0.3609815592  
 O,0,0.762433117,2.9601325519,-0.9852977063  
 H,0,2.6139906198,-2.1668650937,0.210841955  
 H,0,3.503291609,-1.0860035049,1.2996267368  
 H,0,3.6000567277,-0.2041087946,-1.0086592184  
 H,0,-3.5290188114,1.5181621352,2.6523145835  
 H,0,2.4338119146,1.3907840762,1.129850947  
 H,0,0.3299204363,1.5050696129,0.3253909899  
 H,0,1.3450054096,3.1920361757,-1.8187594264  
 H,0,3.7011398295,2.0201046048,-1.3550704495  
 H,0,-5.2682196752,0.0263059675,2.1256159131  
 H,0,0.6726430439,-0.9864305637,1.0029067763  
 H,0,-0.5906694066,-2.4128818925,-1.4760177432  
 O,0,1.3363632409,1.0084440564,-4.0406252153  
 As,0,2.6093177858,2.0494290758,-3.6958958317  
 O,0,3.5091694898,2.3587428714,-5.2501399778  
 O,0,2.1257454064,3.5487466698,-3.0884137469  
 O,0,3.8750558115,1.3697158471,-2.773337736  
 H,0,-0.0038035285,0.4702005845,-2.2159320449

H,0,4.3957094932,2.0866694719,-4.9575562398

### LG 2.5 Nuc 2.7 (b)

gridaslg25.1

E(RB+HF-LYP) = -3518.65364310

Zero-point correction= 0.258945  
(Hartree/Particle)  
Thermal correction to Energy= 0.281356  
Thermal correction to Enthalpy= 0.282300  
Thermal correction to Gibbs Free Energy= 0.205021  
Sum of electronic and zero-point Energies= -  
3518.394698  
Sum of electronic and thermal Energies= -  
3518.372287  
Sum of electronic and thermal Enthalpies= -  
3518.371343  
Sum of electronic and thermal Free Energies= -  
3518.448622

|       | E (Thermal)<br>KCal/Mol | CV<br>Cal/Mol-Kelvin | S<br>Cal/Mol-Kelvin |
|-------|-------------------------|----------------------|---------------------|
| Total | 176.554                 | 83.482               | 162.648             |

C,0,1.02139284,1.6949772532,-0.5100840698  
C,0,0.7514530884,0.534882834,-1.4476323274  
O,0,1.6072860474,-0.4122684332,-1.3871722904  
C,0,2.6922455475,-0.1121115228,-0.4093000226  
C,0,2.4851245366,1.3574767477,0.0354263105  
C,0,2.5973642739,-1.1673448611,0.6832792446  
O,0,1.4955113769,-1.016419286,1.5504985604  
N,0,-0.882984121,-0.8019269765,-0.1091458095  
C,0,-1.2849507227,-1.90228583,-0.8154635696  
N,0,-2.5485363636,-2.3035574356,-0.6656733786  
C,0,-3.0411278761,-1.3812680317,0.2253263259  
C,0,-2.0162314149,-0.4628325522,0.5636443403  
N,0,-2.1342184292,0.5948160092,1.4368754428  
C,0,-3.3161598758,0.7112367349,1.9516372067  
N,0,-4.3714374034,-0.1301897765,1.6824673638  
C,0,-4.34781365,-1.2598363787,0.8062015103  
O,0,-5.3755517225,-1.9308443839,0.6789203163  
O,0,3.5089358255,2.2039096572,-0.3609815592  
O,0,0.762433117,2.9601325519,-0.9852977063  
H,0,2.6139906198,-2.1668650937,0.210841955  
H,0,3.503291609,-1.0860035049,1.2996267368  
H,0,3.6000567277,-0.2041087946,-1.0086592184  
H,0,-3.5290188114,1.5181621352,2.6523145835  
H,0,2.4338119146,1.3907840762,1.129850947  
H,0,0.3299204363,1.5050696129,0.3253909899  
H,0,1.3450054096,3.1920361757,-1.8187594264  
H,0,3.7011398295,2.0201046048,-1.3550704495  
H,0,-5.2682196752,0.0263059675,2.1256159131  
H,0,0.6726430439,-0.9864305637,1.0029067763  
H,0,-0.5906694066,-2.4128818925,-1.4760177432  
O,0,1.3363632409,1.0084440564,-4.0406252153  
As,0,2.6093177858,2.0494290758,-3.6958958317  
O,0,3.5091694898,2.3587428714,-5.2501399778  
O,0,2.1257454064,3.5487466698,-3.0884137469  
O,0,3.8750558115,1.3697158471,-2.773337736  
H,0,-0.0038035285,0.4702005845,-2.2159320449  
H,0,4.3957094932,2.0866694719,-4.9575562398

### LG 2.5 Nuc 2.9

gridaslg25.2

E(RB+HF-LYP) = -3518.65167829

Zero-point correction= 0.258268  
(Hartree/Particle)  
Thermal correction to Energy= 0.280756

Thermal correction to Enthalpy= 0.281701  
Thermal correction to Gibbs Free Energy= 0.203842  
Sum of electronic and zero-point Energies= -  
3518.393410  
Sum of electronic and thermal Energies= -  
3518.370922  
Sum of electronic and thermal Enthalpies= -  
3518.369978  
Sum of electronic and thermal Free Energies= -  
3518.447836

|       | E (Thermal)<br>KCal/Mol | CV<br>Cal/Mol-Kelvin | S<br>Cal/Mol-Kelvin |
|-------|-------------------------|----------------------|---------------------|
| Total | 176.177                 | 83.440               | 163.867             |

C,0,1.0420703678,1.6880629007,-0.4652036952  
C,0,0.7770194026,0.5376765258,-1.4100744893  
O,0,1.6449093171,-0.3968145224,-1.3801829552  
C,0,2.7153468104,-0.1158799479,-0.3797096277  
C,0,2.5224630693,1.3609260298,0.050044095  
C,0,2.5824902415,-1.1652333063,0.7151295278  
O,0,1.4718623416,-0.9889857102,1.5658351799  
N,0,-0.8857157801,-0.8160380257,-0.1244739079  
C,0,-1.2987371791,-1.9097098246,-0.8348474932  
N,0,-2.5649097868,-2.3000893809,-0.6817453485  
C,0,-3.0469824736,-1.3763777536,0.2138597266  
C,0,-2.0142216335,-0.4676634662,0.5521785311  
N,0,-2.1195695881,0.5876277197,1.4293469298  
C,0,-3.2989252601,0.7127420524,1.9480801815  
N,0,-4.3619533884,-0.1187876546,1.6795727295  
C,0,-4.3508956005,-1.2457781429,0.7995742126  
O,0,-5.3842655054,-1.9078634632,0.6736060969  
O,0,3.529287948,2.1994515355,-0.3937104846  
O,0,0.7698351834,2.9459270038,-0.9449038011  
H,0,2.5868035201,-2.1667150909,0.2469767113  
H,0,3.4808177546,-1.0991665266,1.3442387154  
H,0,3.6311210682,-0.2291777078,-0.9625658607  
H,0,-3.502472566,1.5192909041,2.6518535081  
H,0,2.5002626471,1.4110744771,1.1451498683  
H,0,0.3700848139,1.4911167626,0.3842908688  
H,0,1.3103194313,3.1527618138,-1.8257907198  
H,0,3.6729105876,2.0074366945,-1.4012037885  
H,0,-5.2561590055,0.0444599591,2.1255139362  
H,0,0.6545536602,-0.9752914951,1.0094018679  
H,0,-0.6112229974,-2.4231391161,-1.500119067  
O,0,1.347751531,0.936837464,-4.2252007363  
As,0,2.5508371215,2.0049371608,-3.7613113973  
O,0,3.5337957887,2.4303319359,-5.2376396409  
O,0,1.989526237,3.4657579329,-3.1162618046  
O,0,3.796171369,1.3460779922,-2.7919478188  
H,0,0.0640837877,0.5070990529,-2.2252199265  
H,0,4.4139512348,2.2177828378,-4.8828739637

### LG 2.5 Nuc 3.1

gridaslg25.3

E(RB+HF-LYP) = -3518.65001404

Zero-point correction= 0.257889  
(Hartree/Particle)  
Thermal correction to Energy= 0.280479  
Thermal correction to Enthalpy= 0.281424  
Thermal correction to Gibbs Free Energy= 0.202303  
Sum of electronic and zero-point Energies= -  
3518.392125  
Sum of electronic and thermal Energies= -  
3518.369535  
Sum of electronic and thermal Enthalpies= -  
3518.368590

Sum of electronic and thermal Free Energies= -  
3518.447711

|       | E (Thermal) | CV             | S              |
|-------|-------------|----------------|----------------|
|       | KCal/Mol    | Cal/Mol-Kelvin | Cal/Mol-Kelvin |
| Total | 176.003     | 83.365         | 166.523        |

C,0,1.0454255859,1.6851383463,-0.4277330713  
 C,0,0.7886326949,0.5489624133,-1.3863282228  
 O,0,1.6639784529,-0.3774644817,-1.3806630978  
 C,0,2.7272128206,-0.111703734,-0.3680551958  
 C,0,2.5373379213,1.3650800139,0.0646066725  
 C,0,2.5777909016,-1.1658546614,0.7199811433  
 O,0,1.4587193585,-0.9883555121,1.5596661863  
 N,0,-0.8922376329,-0.8260013036,-0.147723891  
 C,0,-1.3202534367,-1.9157296915,-0.8552070635  
 N,0,-2.5877788634,-2.2957295294,-0.6895908574  
 C,0,-3.0540832543,-1.3681841918,0.2106299876  
 C,0,-2.0116029063,-0.4675869426,0.5391819812  
 N,0,-2.0995790316,0.5885182229,1.4168630322  
 C,0,-3.2729656212,0.7234939234,1.9466963336  
 N,0,-4.3448927206,-0.0996000457,1.6885773069  
 C,0,-4.3513919191,-1.2269723292,0.8087626616  
 O,0,-5.3912302742,-1.8802447771,0.6922546164  
 O,0,3.5268564412,2.2069584476,-0.4052841343  
 O,0,0.7666431542,2.9410859131,-0.9037203087  
 H,0,2.5829322414,-2.1652189803,0.2477947998  
 H,0,3.4693079272,-1.1065502528,1.3592584764  
 H,0,3.6461330146,-0.2285358302,-0.9451828579  
 H,0,-3.4632144845,1.532066038,2.6517690645  
 H,0,2.5352155028,1.4179641532,1.1600716368  
 H,0,0.3853310241,1.4778187414,0.4282983819  
 H,0,1.255613053,1.054703172,-1.8297309209  
 H,0,3.644690578,2.0099939021,-1.4200196369  
 H,0,-5.2336386851,0.0713089323,2.142512593  
 H,0,0.646064061,-0.9828749424,0.9968597904  
 H,0,-0.6433459887,-2.434278129,-1.5272491075  
 O,0,1.4478269685,0.8080188747,-4.4043308244  
 As,0,2.5277711809,1.9364103013,-3.8160063735  
 O,0,3.5765032738,2.5047980136,-5.1978948244  
 O,0,1.8245814353,3.3331760359,-3.1602026232  
 O,0,3.7602725499,1.3424222785,-2.7860949222  
 H,0,0.0920713422,0.5375668127,-2.2184458378  
 H,0,4.4415478078,2.3693012733,-4.774654733

## LG 2.7 Nuc 1.9

grid1aslg27.1

E(RB+HF-LYP) = -3518.68751716

|                                              |          |
|----------------------------------------------|----------|
| Zero-point correction=                       | 0.262055 |
| (Hartree/Particle)                           |          |
| Thermal correction to Energy=                | 0.284146 |
| Thermal correction to Enthalpy=              | 0.285091 |
| Thermal correction to Gibbs Free Energy=     | 0.208997 |
| Sum of electronic and zero-point Energies=   | -        |
| 3518.425462                                  |          |
| Sum of electronic and thermal Energies=      | -        |
| 3518.403371                                  |          |
| Sum of electronic and thermal Enthalpies=    | -        |
| 3518.402426                                  |          |
| Sum of electronic and thermal Free Energies= | -        |
| 3518.478520                                  |          |

|       | E (Thermal) | CV             | S              |
|-------|-------------|----------------|----------------|
|       | KCal/Mol    | Cal/Mol-Kelvin | Cal/Mol-Kelvin |
| Total | 178.305     | 82.907         | 160.152        |

C,0,1.1165413684,1.7561740927,-0.596893223  
 C,0,0.8358918424,0.6532160101,-1.6204270933

O,0,1.5628727769,-0.4241601187,-1.3592378557  
 C,0,2.6791319625,-0.1246529474,-0.4545458008  
 C,0,2.5227791567,1.3468276977,0.0009218159  
 C,0,2.6036255431,-1.1561114974,0.6641544988  
 O,0,1.5085352119,-0.9800138469,1.5332457752  
 N,0,-0.8947383734,-0.7047700641,-0.0549272728  
 C,0,-1.2386922102,-1.7908425516,-0.8088445744  
 N,0,-2.497476118,-2.2355045904,-0.7271159831  
 C,0,-3.0496148349,-1.3643731251,0.1781822082  
 C,0,-2.0588676959,-0.432564348,0.5903485573  
 N,0,-2.2442353304,0.5863339494,1.5004489884  
 C,0,-3.4463131108,0.646628216,1.9756103504  
 N,0,-4.4677588373,-0.2114259923,1.632460275  
 C,0,-4.3788483572,-1.3014089567,0.7114571171  
 O,0,-5.385469963,-1.9921704233,0.5182019929  
 O,0,3.6183381681,2.1616496096,-0.3216737878  
 O,0,0.9153188014,3.0814806623,-0.9600817212  
 H,0,2.6068656185,-2.1643791458,0.2079571738  
 H,0,3.5167843925,-1.0709757376,1.2710858517  
 H,0,3.5921357723,-0.2385900031,-1.0459160666  
 H,0,-3.7092860288,1.4163784639,2.7015780352  
 H,0,2.4318559719,1.3774661596,1.0914836572  
 H,0,0.379904838,1.5360785828,0.1879533865  
 H,0,1.5190073363,3.3486857108,-1.7124666313  
 H,0,3.90107057,1.9698946519,-1.2650354963  
 H,0,-5.3839536496,-0.1002327563,2.0485347782  
 H,0,0.6890668076,-0.8919938714,0.9813969616  
 H,0,-0.5033162686,-2.2587814747,-1.4562138318  
 O,0,1.3294509031,1.1939018744,-3.3737258987  
 As,0,2.768217335,2.1514590275,-3.5250779498  
 O,0,3.1079582596,2.0273524487,-5.2939689113  
 O,0,2.46817828,3.7424666657,-3.1282370393  
 O,0,4.1219073642,1.4151959441,-2.8435568558  
 H,0,-0.16078541,0.4515790702,-1.9739135392  
 H,0,3.8861623777,1.4448502335,-5.2834957313

## LG 2.7 Nuc 2.1

grid1aslg27.2

E(RB+HF-LYP) = -3518.67572307

|                                              |          |
|----------------------------------------------|----------|
| Zero-point correction=                       | 0.261205 |
| (Hartree/Particle)                           |          |
| Thermal correction to Energy=                | 0.283390 |
| Thermal correction to Enthalpy=              | 0.284334 |
| Thermal correction to Gibbs Free Energy=     | 0.207839 |
| Sum of electronic and zero-point Energies=   | -        |
| 3518.414519                                  |          |
| Sum of electronic and thermal Energies=      | -        |
| 3518.392333                                  |          |
| Sum of electronic and thermal Enthalpies=    | -        |
| 3518.391389                                  |          |
| Sum of electronic and thermal Free Energies= | -        |
| 3518.467884                                  |          |

|       | E (Thermal) | CV             | S              |
|-------|-------------|----------------|----------------|
|       | KCal/Mol    | Cal/Mol-Kelvin | Cal/Mol-Kelvin |
| Total | 177.830     | 83.067         | 160.999        |

C,0,1.1063719625,1.7474401407,-0.6010983311  
 C,0,0.8101475127,0.6178883985,-1.5808841478  
 O,0,1.5486965681,-0.4343292923,-1.3578324765  
 C,0,2.679313966,-0.1291796069,-0.4568242232  
 C,0,2.5225376552,1.3451615164,-0.0114258503  
 C,0,2.6077573094,-1.1589805114,0.6630318794  
 O,0,1.5255964347,-0.9746966743,1.5459387801  
 N,0,-0.9037467134,-0.7535423608,-0.0087073854  
 C,0,-1.2580039159,-1.8398670548,-0.7578858624  
 N,0,-2.5232839313,-2.2646992272,-0.6811458633  
 C,0,-3.0686919286,-1.3779334293,0.2131078412

C,0,-2.0683911901,-0.4576670503,0.6255448956  
 N,0,-2.2451803725,0.5730355301,1.5234118827  
 C,0,-3.4508710248,0.657488271,1.9859991124  
 N,0,-4.4821316485,-0.1880872459,1.642166589  
 C,0,-4.4020658498,-1.2886769006,0.7330325396  
 O,0,-5.4168841437,-1.9653908771,0.5362709998  
 O,0,3.6104718132,2.1566073499,-0.3455838463  
 O,0,0.8949506952,3.0575632603,-0.9920428146  
 H,0,2.6010525413,-2.168165463,0.2096048477  
 H,0,3.5288333425,-1.0762147619,1.2575394863  
 H,0,3.5775514187,-0.2459872459,-1.0684761582  
 H,0,-3.7084928273,1.4393265131,2.7006724175  
 H,0,2.435380577,1.3785902186,1.0795755856  
 H,0,0.377678516,1.5368258384,0.1973506096  
 H,0,1.5023267264,3.3193888755,-1.7553198773  
 H,0,3.8755865,1.9755833335,-1.3026555227  
 H,0,-5.4008978077,-0.0565571594,2.0465315138  
 H,0,0.6931154486,-0.9087612696,1.010117895  
 H,0,-0.5262415102,-2.3236249499,-1.3979143022  
 O,0,1.3492578173,1.1700799449,-3.5339437552  
 As,0,2.7603232463,2.1482660749,-3.5733519146  
 O,0,3.2450659436,2.1340130362,-5.3178294093  
 O,0,2.4339236559,3.7206675827,-3.1063564357  
 O,0,4.1023732877,1.4196687484,-2.8466288394  
 H,0,-0.1506351936,0.4402044268,-2.0312356233  
 H,0,4.0794495894,1.6392296405,-5.2530880768

### LG 2.7 Nuc 2.3

grid1aslg27.3  
 E(RB+HF-LYP) = -3518.66688523

Zero-point correction= 0.260354  
 (Hartree/Particle)  
 Thermal correction to Energy= 0.282657  
 Thermal correction to Enthalpy= 0.283601  
 Thermal correction to Gibbs Free Energy= 0.206562  
 Sum of electronic and zero-point Energies= -  
 3518.406532  
 Sum of electronic and thermal Energies= -  
 3518.384228  
 Sum of electronic and thermal Enthalpies= -  
 3518.383284  
 Sum of electronic and thermal Free Energies= -  
 3518.460323

|       | E (Thermal)<br>KCal/Mol | CV<br>Cal/Mol-Kelvin | S<br>Cal/Mol-Kelvin |
|-------|-------------------------|----------------------|---------------------|
| Total | 177.370                 | 83.262               | 162.142             |

C,0,1.0706504046,1.7354296889,-0.6183715811  
 C,0,0.788456289,0.5865252313,-1.5714932538  
 O,0,1.5492055,-0.4373526983,-1.3780947842  
 C,0,2.6719809156,-0.1212250125,-0.4567166328  
 C,0,2.4902106762,1.3513026801,-0.0148863327  
 C,0,2.603565743,-1.1581212976,0.6558127522  
 O,0,1.5238635135,-0.9871620748,1.5439342014  
 N,0,-0.9104085815,-0.8005412404,0.0032774964  
 C,0,-1.2892768821,-1.8834537424,-0.7388938488  
 N,0,-2.5606784221,-2.2852427334,-0.6492331539  
 C,0,-3.0831656592,-1.3841942764,0.2447754031  
 C,0,-2.0648270784,-0.4793627072,0.6442999808  
 N,0,-2.215374784,0.559787624,1.5366014769  
 C,0,-3.4157297272,0.6684448804,2.0082437537  
 N,0,-4.4637671851,-0.1615868811,1.6786002298  
 C,0,-4.4105236137,-1.2691026626,0.7758055853  
 O,0,-5.4376029499,-1.9299350445,0.5919814037  
 O,0,3.5663185463,2.1736325539,-0.3434936309  
 O,0,0.8473487622,3.030281375,-1.0389329532  
 H,0,2.6043148363,-2.1646139971,0.1967744567

H,0,3.5259814342,-1.0716036026,1.2473613334  
 H,0,3.5681051729,-0.224629904,-1.0730145547  
 H,0,-3.6537349443,1.4595931653,2.7192632991  
 H,0,2.3908474503,1.3819388537,1.0753115963  
 H,0,0.3380252901,1.5276935767,0.1795097753  
 H,0,1.464532908,3.2864754844,-1.8101980777  
 H,0,3.8290083726,1.9981723535,-1.3083177134  
 H,0,-5.3767082473,-0.0114357596,2.0896637818  
 H,0,0.6856826653,-0.9387689468,1.0149801559  
 H,0,-0.5718229623,-2.3836112091,-1.3827653282  
 O,0,1.3858151124,1.1262380187,-3.7259933926  
 As,0,2.7606266321,2.1253122189,-3.6164364087  
 O,0,3.4235691576,2.2204572443,-5.3033318957  
 O,0,2.3852302736,3.6765276245,-3.0984955195  
 O,0,4.0684209911,1.409187534,-2.8063851684  
 H,0,-0.1184110462,0.4285664579,-2.1286436867  
 H,0,4.2925159062,1.8110448451,-5.1528326046

### LG 2.7 Nuc 2.5

grid1aslg27.4  
 E(RB+HF-LYP) = -3518.66081448

Zero-point correction= 0.259626  
 (Hartree/Particle)  
 Thermal correction to Energy= 0.281974  
 Thermal correction to Enthalpy= 0.282918  
 Thermal correction to Gibbs Free Energy= 0.205711  
 Sum of electronic and zero-point Energies= -  
 3518.401188  
 Sum of electronic and thermal Energies= -  
 3518.378841  
 Sum of electronic and thermal Enthalpies= -  
 3518.377896  
 Sum of electronic and thermal Free Energies= -  
 3518.455103

|       | E (Thermal)<br>KCal/Mol | CV<br>Cal/Mol-Kelvin | S<br>Cal/Mol-Kelvin |
|-------|-------------------------|----------------------|---------------------|
| Total | 176.941                 | 83.366               | 162.496             |

C,0,1.0550103814,1.7361995958,-0.6163637279  
 C,0,0.777360836,0.579965957,-1.5543431303  
 O,0,1.5585101174,-0.4222921903,-1.3977511154  
 C,0,2.669741476,-0.1121575661,-0.4496084628  
 C,0,2.4816110401,1.3612942324,-0.0137253169  
 C,0,2.5860147416,-1.152542347,0.6580111589  
 O,0,1.5084649613,-0.9756947171,1.546719399  
 N,0,-0.9178081195,-0.83019729,0.0038104968  
 C,0,-1.3121519898,-1.9112049005,-0.7334402144  
 N,0,-2.5856529664,-2.3012887013,-0.6309126123  
 C,0,-3.0925663645,-1.3929692337,0.2650556209  
 C,0,-2.0642733092,-0.4953402666,0.652612307  
 N,0,-2.197324314,0.5481549632,1.5421422607  
 C,0,-3.3924990209,0.6685694466,2.0242282652  
 N,0,-4.4497633798,-0.1544686477,1.7077521049  
 C,0,-4.4139363322,-1.2659280658,0.8088594909  
 O,0,-5.4472071807,-1.9196418285,0.6372859318  
 O,0,3.5482859417,2.1839972469,-0.3562918345  
 O,0,0.8280890221,3.0188321871,-1.0621190008  
 H,0,2.5804795102,-2.1574846376,0.1960882101  
 H,0,3.5086808737,-1.0744933675,1.2501145571  
 H,0,3.5674968373,-0.2160055031,-1.0627579154  
 H,0,-3.6173809523,1.4645613053,2.7339541894  
 H,0,2.384674267,1.3952768216,1.0767778106  
 H,0,0.3250857784,1.5337963125,0.1869046623  
 H,0,1.4475029443,3.2605417777,-1.851759058  
 H,0,3.7928716465,2.0013668638,-1.3308973916  
 H,0,-5.3575308064,0.0045469859,2.1269010494  
 H,0,0.6685881026,-0.9418928603,1.0192984875

H,0,-0.6049608641,-2.419493438,-1.3823580621  
 O,0,1.4047540978,1.0929119081,-3.919351622  
 As,0,2.7467134646,2.0910801801,-3.6671193677  
 O,0,3.5624750689,2.2858263406,-5.2803878082  
 O,0,2.3369353924,3.6227228845,-3.1018833676  
 O,0,4.008134766,1.3676101944,-2.7826666392  
 H,0,-0.0716404074,0.45435245,-2.2054084688  
 H,0,4.43945921,1.9361555278,-5.0477047269

### LG 2.7 Nuc 2.7

grid1aslg27.5  
 E(RB+HF-LYP) = -3518.65680718

Zero-point correction= 0.258692  
 (Hartree/Particle)  
 Thermal correction to Energy= 0.281148  
 Thermal correction to Enthalpy= 0.282093  
 Thermal correction to Gibbs Free Energy= 0.204382  
 Sum of electronic and zero-point Energies= -  
 3518.398115  
 Sum of electronic and thermal Energies= -  
 3518.375659  
 Sum of electronic and thermal Enthalpies= -  
 3518.374715  
 Sum of electronic and thermal Free Energies= -  
 3518.452425

|       | E (Thermal) | CV             | S              |
|-------|-------------|----------------|----------------|
|       | KCal/Mol    | Cal/Mol-Kelvin | Cal/Mol-Kelvin |
| Total | 176.423     | 83.501         | 163.556        |

C,0,1.0578201869,1.7299574804,-0.5871833839  
 C,0,0.7881997327,0.5746283678,-1.5209261706  
 O,0,1.590643358,-0.4079203797,-1.4016544467  
 C,0,2.6852810414,-0.1086701423,-0.4255087105  
 C,0,2.4993999007,1.3691703528,-0.0013995933  
 C,0,2.572853991,-1.1481465251,0.6808720737  
 O,0,1.4896543768,-0.9573170145,1.5591752188  
 N,0,-0.9208689214,-0.8611950619,-0.0018849967  
 C,0,-1.3332442513,-1.9315711678,-0.7449766605  
 N,0,-2.6117538555,-2.3025426428,-0.6397964714  
 C,0,-3.1023133628,-1.3910738605,0.2623732592  
 C,0,-2.0604559489,-0.5108109551,0.6512779987  
 N,0,-2.1740895739,0.530011225,1.5461790345  
 C,0,-3.3657839465,0.6660293478,2.0328890088  
 N,0,-4.4358392868,-0.1399366051,1.716414126  
 C,0,-4.419893955,-1.2473606122,0.8118689438  
 O,0,-5.4626917665,-1.8854254915,0.641340533  
 O,0,3.5500453187,2.1905730517,-0.3801227029  
 O,0,0.8186968668,3.0014444012,-1.049548737  
 H,0,2.5600301319,-2.1528552553,0.2190831779  
 H,0,3.490681248,-1.0816108951,1.281702622  
 H,0,3.5892257566,-0.2231752092,-1.0269744856  
 H,0,-3.5762229843,1.4619541366,2.7469802063  
 H,0,2.4210492878,1.4147726208,1.0903935615  
 H,0,0.3407609982,1.5250382413,0.2277368119  
 H,0,1.4171897655,3.2269286547,-1.8763690082  
 H,0,3.7562737744,2.0015632745,-1.3688272658  
 H,0,-5.339791897,0.0309074414,2.1391668419  
 H,0,0.6513904891,-0.9476953877,1.0280366062  
 H,0,-0.6362063881,-2.4465758441,-1.399548528  
 O,0,1.419062669,1.0330184545,-4.1058596194  
 As,0,2.7022136492,2.0527589065,-3.7276953911  
 O,0,3.6312927122,2.3565883301,-5.2636226703  
 O,0,2.2291890067,3.5565441688,-3.1231600171  
 O,0,3.9353861295,1.3436670119,-2.7861849545  
 H,0,-0.0024257691,0.4829221115,-2.2508243308  
 H,0,4.5074859861,2.0600730905,-4.9637557198

### LG 2.7 Nuc 2.9

grid1aslg27.6  
 E(RB+HF-LYP) = -3518.65403508

Zero-point correction= 0.257869  
 (Hartree/Particle)  
 Thermal correction to Energy= 0.280442  
 Thermal correction to Enthalpy= 0.281386  
 Thermal correction to Gibbs Free Energy= 0.202934  
 Sum of electronic and zero-point Energies= -  
 3518.396166  
 Sum of electronic and thermal Energies= -  
 3518.373594  
 Sum of electronic and thermal Enthalpies= -  
 3518.372649  
 Sum of electronic and thermal Free Energies= -  
 3518.451101

|       | E (Thermal) | CV             | S              |
|-------|-------------|----------------|----------------|
|       | KCal/Mol    | Cal/Mol-Kelvin | Cal/Mol-Kelvin |
| Total | 175.980     | 83.535         | 165.115        |

C,0,1.0889436298,1.719836513,-0.5242636532  
 C,0,0.8209864818,0.5800990392,-1.4694294314  
 O,0,1.6360568508,-0.3921512377,-1.3893470168  
 C,0,2.7169390864,-0.1170630506,-0.39006999  
 C,0,2.5520626714,1.3682605206,0.0202042286  
 C,0,2.5630140982,-1.1498555174,0.7183950821  
 O,0,1.4703502392,-0.9317753065,1.5775792426  
 N,0,-0.913854041,-0.8878392778,-0.0115241836  
 C,0,-1.3371059094,-1.9537228443,-0.7551141112  
 N,0,-2.6206916892,-2.3065989469,-0.6541042425  
 C,0,-3.1029149918,-1.3861160643,0.2436938899  
 C,0,-2.0516628972,-0.5190798346,0.6351251108  
 N,0,-2.1539070235,0.5251076088,1.5269931302  
 C,0,-3.3459396467,0.6796241017,2.0075004134  
 N,0,-4.4254575902,-0.1121607118,1.6881619064  
 C,0,-4.4209346764,-1.2226681896,0.7870535893  
 O,0,-5.4714588874,-1.8466959703,0.6136941645  
 O,0,3.5827457061,2.1800113014,-0.4174362049  
 O,0,0.8316256955,2.9873188498,-0.9795678515  
 H,0,2.5370072095,-2.1561429235,0.2610495849  
 H,0,3.4724205025,-1.0997997027,1.3335288434  
 H,0,3.6280077595,-0.2567177558,-0.9747415086  
 H,0,-3.548348623,1.4806403907,2.7181037382  
 H,0,2.5131990808,1.4311987872,1.113590981  
 H,0,0.3969507411,1.4997526496,0.3081450581  
 H,0,1.3718418181,3.1875846058,-1.86480998  
 H,0,3.7244883171,1.986383089,-1.4239124666  
 H,0,-5.3291538916,0.0733468136,2.1052649894  
 H,0,0.6375883311,-0.9434560477,1.0370940954  
 H,0,-0.6448610527,-2.4787934962,-1.4066504177  
 O,0,1.4018267946,0.9571551835,-4.2855356603  
 As,0,2.6108481559,2.0079245795,-3.7948557468  
 O,0,3.6163428205,2.4351573714,-5.2533779853  
 O,0,2.057712613,3.4712315626,-3.1474090737  
 O,0,3.8308350719,1.3214087877,-2.8144880676  
 H,0,0.0771579806,0.5298216806,-2.2553591551  
 H,0,4.4895837345,2.203441062,-4.8935151413

### LG 2.7 Nuc 3.1

grid1aslg27.7  
 E(RB+HF-LYP) = -3518.65195764

Zero-point correction= 0.257489  
 (Hartree/Particle)  
 Thermal correction to Energy= 0.280145  
 Thermal correction to Enthalpy= 0.281090  
 Thermal correction to Gibbs Free Energy= 0.201864



Sum of electronic and zero-point Energies= -  
 3518.394469  
 Sum of electronic and thermal Energies= -  
 3518.371812  
 Sum of electronic and thermal Enthalpies= -  
 3518.370868  
 Sum of electronic and thermal Free Energies= -  
 3518.450093

|       | E (Thermal)<br>KCal/Mol | CV<br>Cal/Mol-Kelvin | S<br>Cal/Mol-Kelvin |
|-------|-------------------------|----------------------|---------------------|
| Total | 175.794                 | 83.456               | 166.743             |

C,0,1.0969011594,1.7062316478,-0.4781361816  
 C,0,0.8426266514,0.5848175668,-1.4426523642  
 O,0,1.6656762944,-0.3804833871,-1.3869628052  
 C,0,2.7358153097,-0.1210846196,-0.3717224143  
 C,0,2.5740447671,1.3650028251,0.0397067292  
 C,0,2.5623551166,-1.1578644486,0.7303664324  
 O,0,1.4614084731,-0.9360058481,1.5777133576  
 N,0,-0.9073316512,-0.9096989994,-0.0305408119  
 C,0,-1.3459618028,-1.9782480833,-0.7615647936  
 N,0,-2.6330420412,-2.3143158686,-0.6517922126  
 C,0,-3.1010088488,-1.3782919545,0.2377257989  
 C,0,-2.0384961661,-0.5198301095,0.6158952517  
 N,0,-2.1241087873,0.5348113626,1.4967800672  
 C,0,-3.3124610497,0.7097266356,1.9795254679  
 N,0,-4.4026349923,-0.072049255,1.6724700606  
 C,0,-4.415024424,-1.192684096,0.7838950638  
 O,0,-5.473436096,-1.8059219793,0.6214565014  
 O,0,3.5844130732,2.1803144832,-0.4301394989  
 O,0,0.8253104467,2.9742824028,-0.9184159458  
 H,0,2.5352724437,-2.1619922729,0.2687555266  
 H,0,3.4651641507,-1.1162393437,1.3557740611  
 H,0,3.6517178152,-0.2662815335,-0.9472629551  
 H,0,-3.5022523742,1.5210850111,2.681721426  
 H,0,2.5584214204,1.4316486167,1.1337195658  
 H,0,0.4198081421,1.4664668545,0.3605372177  
 H,0,1.3035925079,3.1419644598,-1.8499591898  
 H,0,3.6869110664,1.986146821,-1.4474598683  
 H,0,-5.3026190663,0.1296662027,2.0900874672  
 H,0,0.6336478047,-0.9577688795,1.0296435488  
 H,0,-0.662812504,-2.5181147181,-1.4105620038  
 O,0,1.4639043784,0.8506324144,-4.4681019187  
 As,0,2.5538855109,1.9535234984,-3.8494952134  
 O,0,3.6277194585,2.5273434902,-5.2076690269  
 O,0,1.8639969026,3.3513012437,-3.1811680675  
 O,0,3.7600172512,1.3189479879,-2.8135966972  
 H,0,0.1249081312,0.5573824114,-2.2572074795  
 H,0,4.4859159984,2.360247081,-4.7816979355

### LG 2.9 Nuc 1.9

grid1aslg29.2  
 E(RB+HF-LYP) = -3518.69307011

|                                              |          |
|----------------------------------------------|----------|
| Zero-point correction=                       | 0.261832 |
| (Hartree/Particle)                           |          |
| Thermal correction to Energy=                | 0.284001 |
| Thermal correction to Enthalpy=              | 0.284945 |
| Thermal correction to Gibbs Free Energy=     | 0.208180 |
| Sum of electronic and zero-point Energies=   | -        |
| 3518.431238                                  |          |
| Sum of electronic and thermal Energies=      | -        |
| 3518.409069                                  |          |
| Sum of electronic and thermal Enthalpies=    | -        |
| 3518.408125                                  |          |
| Sum of electronic and thermal Free Energies= | -        |
| 3518.484890                                  |          |

|       | E (Thermal)<br>KCal/Mol | CV<br>Cal/Mol-Kelvin | S<br>Cal/Mol-Kelvin |
|-------|-------------------------|----------------------|---------------------|
| Total | 178.214                 | 82.890               | 161.566             |

C,0,1.1740335441,1.806115594,-0.6489447688  
 C,0,0.8846091511,0.7022310862,-1.6667747955  
 O,0,1.5685429963,-0.3924630365,-1.3656751272  
 C,0,2.6872135808,-0.105290283,-0.4572099871  
 C,0,2.5655301415,1.3781806831,-0.0320338247  
 C,0,2.5769152648,-1.113689978,0.6803969767  
 O,0,1.4951160676,-0.88443916,1.5512534571  
 N,0,-0.949745276,-0.7552040526,0.0423236399  
 C,0,-1.2956723076,-1.7937137957,-0.7725352564  
 N,0,-2.5640698252,-2.2178197065,-0.7376646003  
 C,0,-3.1190468264,-1.3814916281,0.1978881109  
 C,0,-2.1207088505,-0.4895210179,0.6759185889  
 N,0,-2.3078101514,0.4900021526,1.628126611  
 C,0,-3.5190664976,0.5507311793,2.0794351358  
 N,0,-4.5477630131,-0.2712088417,1.6750517713  
 C,0,-4.4586270147,-1.3174108858,0.7046722759  
 O,0,-5.4734474119,-1.9782090603,0.4571728486  
 O,0,3.6816667218,2.1600495787,-0.363848594  
 O,0,0.9939874959,3.1318156262,-1.0186000562  
 H,0,2.5441963387,-2.1287063679,0.2407412184  
 H,0,3.4960508858,-1.049718522,1.2811535804  
 H,0,3.6011505196,-0.2553101591,-1.0394924601  
 H,0,-3.7847268785,1.2911621585,2.8344417663  
 H,0,2.4677675858,1.4332874658,1.0568134611  
 H,0,0.4252786925,1.5933528255,0.1289883311  
 H,0,1.6061621413,3.3825412358,-1.7709200111  
 H,0,3.9644878558,1.9482947019,-1.3028569483  
 H,0,-5.4713135175,-0.1609296076,2.074803634  
 H,0,0.6620523444,-0.8344911609,1.0112983087  
 H,0,-0.5551271086,-2.2426183545,-1.4274402995  
 O,0,1.3992098347,1.1905895395,-3.4293546996  
 As,0,2.8485679569,2.13664398,-3.5709737525  
 O,0,3.1967536489,2.0024460652,-5.3363535261  
 O,0,2.5604223288,3.7320896979,-3.1838069081  
 O,0,4.1858898072,1.3848515803,-2.8759046064  
 H,0,-0.1219168749,0.5146791714,-2.0092778754  
 H,0,3.9656811196,1.4078389164,-5.3211454587

### LG 2.9 Nuc 2.1

grid1aslg29.3  
 E(RB+HF-LYP) = -3518.68027892

|                                              |          |
|----------------------------------------------|----------|
| Zero-point correction=                       | 0.260990 |
| (Hartree/Particle)                           |          |
| Thermal correction to Energy=                | 0.283255 |
| Thermal correction to Enthalpy=              | 0.284200 |
| Thermal correction to Gibbs Free Energy=     | 0.206954 |
| Sum of electronic and zero-point Energies=   | -        |
| 3518.419289                                  |          |
| Sum of electronic and thermal Energies=      | -        |
| 3518.397024                                  |          |
| Sum of electronic and thermal Enthalpies=    | -        |
| 3518.396079                                  |          |
| Sum of electronic and thermal Free Energies= | -        |
| 3518.473325                                  |          |

|       | E (Thermal)<br>KCal/Mol | CV<br>Cal/Mol-Kelvin | S<br>Cal/Mol-Kelvin |
|-------|-------------------------|----------------------|---------------------|
| Total | 177.745                 | 83.053               | 162.576             |

C,0,1.1573408835,1.7978666663,-0.6602531183  
 C,0,0.8568321737,0.6686331894,-1.6367430733  
 O,0,1.5522260948,-0.4023320318,-1.3694383827  
 C,0,2.6816857146,-0.1088663923,-0.4600322535  
 C,0,2.5560956342,1.3768465612,-0.0446411721

C,0,2.5745979684,-1.1164195599,0.6781468994  
 O,0,1.504265883,-0.8816995358,1.5608657762  
 N,0,-0.9567187153,-0.8006975786,0.0843311873  
 C,0,-1.3142210301,-1.8387408279,-0.7266351829  
 N,0,-2.5884841499,-2.2436355919,-0.6943015412  
 C,0,-3.1349652678,-1.3932005669,0.2334267831  
 C,0,-2.1266278746,-0.5130348213,0.7106494268  
 N,0,-2.3034576816,0.4764781166,1.6541238236  
 C,0,-3.5166115295,0.5599247109,2.0969907951  
 N,0,-4.5552760373,-0.2491893269,1.6929109959  
 C,0,-4.4766928928,-1.304513123,0.7314952835  
 O,0,-5.4995578476,-1.9512136129,0.4820728789  
 O,0,3.6656313136,2.1568170529,-0.3819107773  
 O,0,0.968171487,3.1088402865,-1.0567502092  
 H,0,2.534943408,-2.1319333861,0.2408515125  
 H,0,3.5006931541,-1.0535024638,1.2675882457  
 H,0,3.5828373815,-0.2599032246,-1.0600355908  
 H,0,-3.7752862112,1.3107350384,2.8439720106  
 H,0,2.4565506384,1.4340443497,1.0440768135  
 H,0,0.4127100515,1.5925383831,0.1273803649  
 H,0,1.5858194952,3.3541002366,-1.8186538543  
 H,0,3.9356257414,1.9560484617,-1.333647661  
 H,0,-5.4798088208,-0.1199787186,2.0846822851  
 H,0,0.6594351502,-0.8544319413,1.0370477115  
 H,0,-0.578863625,-2.3027647665,-1.3770068299  
 O,0,1.4237652763,1.1689550456,-3.5958914467  
 As,0,2.8476250829,2.1326261831,-3.6170237943  
 O,0,3.3507423914,2.1058080969,-5.3547772247  
 O,0,2.5322155628,3.7108235513,-3.1630231968  
 O,0,4.1675864754,1.3874738144,-2.8692822051  
 H,0,-0.1122508208,0.4989036441,-2.0781921203  
 H,0,4.1736700123,1.5932617014,-5.2827069991

### LG 2.9 Nuc 2.3

grid1aslg29.4

E(RB+HF-LYP) = -3518.67058101

|                                              |          |
|----------------------------------------------|----------|
| Zero-point correction=                       | 0.260145 |
| (Hartree/Particle)                           |          |
| Thermal correction to Energy=                | 0.282508 |
| Thermal correction to Enthalpy=              | 0.283452 |
| Thermal correction to Gibbs Free Energy=     | 0.205876 |
| Sum of electronic and zero-point Energies=   | -        |
| 3518.410436                                  |          |
| Sum of electronic and thermal Energies=      | -        |
| 3518.388073                                  |          |
| Sum of electronic and thermal Enthalpies=    | -        |
| 3518.387129                                  |          |
| Sum of electronic and thermal Free Energies= | -        |
| 3518.464705                                  |          |

|       | E (Thermal) | CV             | S              |
|-------|-------------|----------------|----------------|
|       | KCal/Mol    | Cal/Mol-Kelvin | Cal/Mol-Kelvin |
| Total | 177.276     | 83.253         | 163.273        |

C,0,1.1032150955,1.7857400516,-0.6973161234  
 C,0,0.8297853982,0.6351556884,-1.6478962777  
 O,0,1.546404831,-0.4076099343,-1.3999784307  
 C,0,2.6625123228,-0.0965955551,-0.4639595819  
 C,0,2.4983174033,1.3854386534,-0.0485013854  
 C,0,2.5638198513,-1.1161876333,0.6625094632  
 O,0,1.4939430859,-0.9045278326,1.5504672389  
 N,0,-0.9633948446,-0.848443978,0.0822572659  
 C,0,-1.3536306756,-1.8827911263,-0.7184257269  
 N,0,-2.6342981295,-2.2629387087,-0.6628362276  
 C,0,-3.1489868257,-1.3982733356,0.2701478044  
 C,0,-2.1173836938,-0.5349557114,0.7258909757  
 N,0,-2.258478688,0.4621647268,1.6669287923  
 C,0,-3.4617042215,0.56975378,2.1312965834

N,0,-4.5214572165,-0.2227754774,1.750532636  
 C,0,-4.4796214688,-1.2838567711,0.7930471099  
 O,0,-5.5175101715,-1.9138342909,0.5658713218  
 O,0,3.5980328078,2.1827922627,-0.360615697  
 O,0,0.9059876958,3.0801088639,-1.127943154  
 H,0,2.5380956227,-2.1277184091,0.2152922199  
 H,0,3.4908314391,-1.0460397711,1.2493449677  
 H,0,3.5643424108,-0.224102914,-1.0673587109  
 H,0,-3.6929998358,1.3289346093,2.8786296306  
 H,0,2.3697051924,1.4345548974,1.037637868  
 H,0,0.345123686,1.5818374709,0.0807450254  
 H,0,1.546511271,3.3208250007,-1.8871914972  
 H,0,3.8785066818,1.9916623541,-1.3169223965  
 H,0,-5.435935682,-0.0755762404,2.1592188385  
 H,0,0.6466598454,-0.8873667624,1.0301050368  
 O,0,-0.6385015166,-2.3651524519,-1.3782693723  
 O,0,1.4818185585,1.1299676833,-3.797317184  
 As,0,2.8679669717,2.1120026281,-3.6519161669  
 O,0,3.5753577972,2.189899977,-5.3201386121  
 O,0,2.4971160119,3.6709457108,-3.1551041094  
 O,0,4.1381494504,1.378947738,-2.8005890675  
 H,0,-0.0801619645,0.4770300392,-2.2040437588  
 H,0,4.4241059737,1.745652388,-5.1539331382

### LG 2.9 Nuc 2.5

grid1aslg29.5

E(RB+HF-LYP) = -3518.66377757

|                                              |          |
|----------------------------------------------|----------|
| Zero-point correction=                       | 0.259433 |
| (Hartree/Particle)                           |          |
| Thermal correction to Energy=                | 0.281831 |
| Thermal correction to Enthalpy=              | 0.282775 |
| Thermal correction to Gibbs Free Energy=     | 0.205092 |
| Sum of electronic and zero-point Energies=   | -        |
| 3518.404344                                  |          |
| Sum of electronic and thermal Energies=      | -        |
| 3518.381946                                  |          |
| Sum of electronic and thermal Enthalpies=    | -        |
| 3518.381002                                  |          |
| Sum of electronic and thermal Free Energies= | -        |
| 3518.458685                                  |          |

|       | E (Thermal) | CV             | S              |
|-------|-------------|----------------|----------------|
|       | KCal/Mol    | Cal/Mol-Kelvin | Cal/Mol-Kelvin |
| Total | 176.852     | 83.370         | 163.498        |

C,0,1.0784443334,1.7805975923,-0.7064791259  
 C,0,0.8129375356,0.6232632675,-1.6417687709  
 O,0,1.5452909458,-0.4022944892,-1.4227611689  
 C,0,2.652269775,-0.0926963223,-0.4643174904  
 C,0,2.4756294191,1.3882615596,-0.0493438852  
 C,0,2.5497045498,-1.1198260899,0.6544802563  
 O,0,1.4838693561,-0.9134599064,1.5480081128  
 N,0,-0.9694984588,-0.8765179158,0.0855322112  
 C,0,-1.3761066343,-1.9140873869,-0.7032732529  
 N,0,-2.658876014,-2.2826299367,-0.6313888441  
 C,0,-3.1570386862,-1.4056071935,0.2992633288  
 C,0,-2.114681866,-0.5470225658,0.7372455961  
 N,0,-2.2373758323,0.4596891751,1.6702564305  
 C,0,-3.4349056791,0.5813517049,2.1459893711  
 N,0,-4.5044954643,-0.206264911,1.78368782  
 C,0,-4.4812760007,-1.2762136963,0.8353597006  
 O,0,-5.5257404914,-1.9004342892,0.6249662145  
 O,0,3.5673099647,2.1898901928,-0.3623931877  
 O,0,0.8786171051,3.0643868793,-1.1569263328  
 H,0,2.5235089667,-2.1285326994,0.2014067898  
 H,0,3.4787232727,-1.0531335672,1.2382350465  
 H,0,3.5534208086,-0.212748619,-1.069901595  
 H,0,-3.6522070661,1.3493517966,2.8883516457

H,0,2.3411522597,1.4351240796,1.0362583963  
H,0,0.3170491698,1.5777350003,0.0709971568  
H,0,1.5227447314,3.2932767186,-1.9320475918  
H,0,3.8382932624,1.9998849712,-1.3272175884  
H,0,-5.4133849026,-0.0480675502,2.200680213  
H,0,0.6327822249,-0.9059900369,1.0335990755  
H,0,-0.6720455304,-2.4086376204,-1.3661245241  
O,0,1.5232209779,1.0946433401,-3.9919368161  
As,0,2.8644967669,2.0847931366,-3.6986291948  
O,0,3.7283051181,2.2650953828,-5.2870913013  
O,0,2.4478690428,3.6229636591,-3.1571894656  
O,0,4.0884269233,1.3529032419,-2.7719425804  
H,0,-0.0375399012,0.4934234565,-2.292631491  
H,0,4.5933504876,1.9021972612,-5.0312866944

## LG 2.9 Nuc 2.7

grid1aslg29.6

E(RB+HF-LYP) = -3518.65912855

|                                              |          |
|----------------------------------------------|----------|
| Zero-point correction=                       | 0.258406 |
| (Hartree/Particle)                           |          |
| Thermal correction to Energy=                | 0.280908 |
| Thermal correction to Enthalpy=              | 0.281852 |
| Thermal correction to Gibbs Free Energy=     | 0.203590 |
| Sum of electronic and zero-point Energies=   | -        |
| 3518.400722                                  |          |
| Sum of electronic and thermal Energies=      | -        |
| 3518.378221                                  |          |
| Sum of electronic and thermal Enthalpies=    | -        |
| 3518.377277                                  |          |
| Sum of electronic and thermal Free Energies= | -        |
| 3518.455539                                  |          |

|       | E (Thermal) | CV             | S              |
|-------|-------------|----------------|----------------|
|       | KCal/Mol    | Cal/Mol-Kelvin | Cal/Mol-Kelvin |
| Total | 176.272     | 83.506         | 164.716        |

C,0,1.1028006082,1.7763271042,-0.6470460392  
C,0,0.8244602887,0.6304261297,-1.5833723506  
O,0,1.5747050389,-0.3845854814,-1.4195886638  
C,0,2.676927413,-0.1002042382,-0.4413526771  
C,0,2.523425565,1.3854716549,-0.0322872248  
C,0,2.5404145798,-1.125877416,0.6757112261  
O,0,1.4743771242,-0.8932137492,1.5615044735  
N,0,-0.9629119024,-0.9221711153,0.0913632306  
C,0,-1.3762863581,-1.9714615351,-0.6784964714  
N,0,-2.6634175294,-2.3228791483,-0.6071890803  
C,0,-3.1575368632,-1.4195307483,0.3004363917  
C,0,-2.1087298004,-0.5641227322,0.7271773831  
N,0,-2.2248662729,0.4643725337,1.6365426229  
C,0,-3.4244192821,0.6120130095,2.099945533  
N,0,-4.5008496451,-0.1702999138,1.7471420364  
C,0,-4.4841032551,-1.261814388,0.823391637  
O,0,-5.5341521216,-1.8782307859,0.6194818292  
O,0,3.6005093462,2.1767070628,-0.3996102082  
O,0,0.8884517613,0.0550506025,-1.095359657  
H,0,2.4942940033,-2.1337398951,0.2230218846  
H,0,3.4673126229,-1.0804805801,1.2649194719  
H,0,3.5776916553,-0.2409789583,-1.0422428597  
H,0,-3.6373938599,1.3994440719,2.8228099503  
H,0,2.4269775341,1.4420300113,1.0571632627  
H,0,0.3654101954,1.5630854582,0.1520373986  
H,0,1.4971699138,3.2703277312,-1.9200733969  
H,0,3.8122449386,1.9829646759,-1.385937286  
H,0,-5.4110094183,0.0094507079,2.1524900187  
H,0,0.6226747767,-0.9118704996,1.0471258471  
H,0,-0.674485895,-2.4874323278,-1.3272905759  
O,0,1.491757394,1.0633253108,-4.1635486612  
As,0,2.7841328381,2.0626708245,-3.7580712418

O,0,3.7385706634,2.3624392135,-5.2776848381  
O,0,2.3236939333,3.5708255238,-3.1543559185  
O,0,3.9890958095,1.3259763365,-2.8031338925  
H,0,0.0221718775,0.5432786813,-2.3023210549  
H,0,4.6031367918,2.0373744883,-4.9736359396

## LG 2.9 Nuc 2.9

grid1aslg29.7

E(RB+HF-LYP) = -3518.65590172

|                                              |          |
|----------------------------------------------|----------|
| Zero-point correction=                       | 0.257364 |
| (Hartree/Particle)                           |          |
| Thermal correction to Energy=                | 0.279996 |
| Thermal correction to Enthalpy=              | 0.280940 |
| Thermal correction to Gibbs Free Energy=     | 0.201879 |
| Sum of electronic and zero-point Energies=   | -        |
| 3518.398538                                  |          |
| Sum of electronic and thermal Energies=      | -        |
| 3518.375906                                  |          |
| Sum of electronic and thermal Enthalpies=    | -        |
| 3518.374961                                  |          |
| Sum of electronic and thermal Free Energies= | -        |
| 3518.454023                                  |          |

|       | E (Thermal) | CV             | S              |
|-------|-------------|----------------|----------------|
|       | KCal/Mol    | Cal/Mol-Kelvin | Cal/Mol-Kelvin |
| Total | 175.700     | 83.575         | 166.398        |

C,0,1.148468908,1.7637854846,-0.5754751823  
C,0,0.8606751559,0.6361460015,-1.5225213344  
O,0,1.6197801361,-0.3750101534,-1.4050935343  
C,0,2.7131725164,-0.1209712803,-0.4046806791  
C,0,2.5951726285,1.3731475035,-0.0148043378  
C,0,2.5294199536,-1.133481324,0.7185214636  
O,0,1.4657025262,-0.8557937128,1.5924962984  
N,0,-0.9457283587,-0.9359346824,0.1131620851  
C,0,-1.3537541547,-1.9833238743,-0.6627233773  
N,0,-2.6450261375,-2.3216325045,-0.6154068172  
C,0,-3.1483143004,-1.4104090556,0.27937599  
C,0,-2.1005336539,-0.5639659194,0.7246206826  
N,0,-2.2236785968,0.4669170708,1.630066453  
C,0,-3.4308659475,0.6281468953,2.068575184  
N,0,-4.5078370183,-0.1438277929,1.6956366303  
C,0,-4.4834326113,-1.2385574449,0.7758149332  
O,0,-5.5347574251,-1.8458256999,0.5531762344  
O,0,3.6536170884,2.145730406,-0.4551934742  
O,0,0.9187131117,3.0405592954,-1.0102341709  
H,0,2.451702621,-2.1423969798,0.2730784034  
H,0,3.4534621234,-1.1166063648,1.3140700752  
H,0,3.617374364,-0.2990007398,-0.9899205404  
H,0,-3.6501942336,1.4193601752,2.7853194288  
H,0,2.5499018691,1.4512289431,1.0769739067  
H,0,0.4425278344,1.535139302,0.2470912053  
H,0,1.4632196006,3.2352114583,-1.9027621977  
H,0,3.7864818989,1.9496639939,-1.4621483417  
H,0,-5.4242797489,0.0468740957,2.0813633332  
H,0,0.6138714153,-0.8937455208,1.0771796461  
H,0,-0.6449427915,-2.5070528378,-1.2974125108  
O,0,1.4323850094,1.0135518463,-4.3404468759  
As,0,2.6693399131,2.0229985416,-3.8320315557  
O,0,3.6880640727,2.4441825672,-5.2807160022  
O,0,2.1531835437,3.4939712113,-3.1683689581  
O,0,3.8608497603,1.2886039616,-2.853623287  
H,0,0.1107991889,0.5954894971,-2.3040556763  
H,0,4.5577042086,2.2014952572,-4.9192369401

## LG 2.9 Nuc 3.1

grid1aslg29.8

E(RB+HF-LYP) = -3518.65365135

Zero-point correction= 0.257024  
 (Hartree/Particle)  
 Thermal correction to Energy= 0.279762  
 Thermal correction to Enthalpy= 0.280706  
 Thermal correction to Gibbs Free Energy= 0.200499  
 Sum of electronic and zero-point Energies= -  
 3518.396627  
 Sum of electronic and thermal Energies= -  
 3518.373889  
 Sum of electronic and thermal Enthalpies= -  
 3518.372945  
 Sum of electronic and thermal Free Energies= -  
 3518.453152

|       | E (Thermal)<br>KCal/Mol | CV<br>Cal/Mol-Kelvin | S<br>Cal/Mol-Kelvin |
|-------|-------------------------|----------------------|---------------------|
| Total | 175.553                 | 83.497               | 168.810             |

C,0,1.1806166604,1.7426563406,-0.5288955545  
 C,0,0.9107444847,0.6335637781,-1.4958393233  
 O,0,1.6639807174,-0.381032093,-1.3829976757  
 C,0,2.7406548957,-0.1415025678,-0.3647162242  
 C,0,2.6385368126,1.3594538118,0.0096842175  
 C,0,2.5271042062,-1.1440129637,0.7629078393  
 O,0,1.4525066789,-0.847248524,1.6167604947  
 N,0,-0.926735583,-0.9512289056,0.0922722207  
 C,0,-1.3439097374,-2.0033351317,-0.6723023425  
 N,0,-2.6383723211,-2.3281983417,-0.6228444325  
 C,0,-3.1341402536,-1.4014942572,0.2603562852  
 C,0,-2.0790036249,-0.5604562225,0.6973426689  
 N,0,-2.1925393915,0.4827822991,1.5894564919  
 C,0,-3.3988997678,0.662703821,2.023100665  
 N,0,-4.4829229657,-0.1027813465,1.6577745633  
 C,0,-4.4682549833,-1.2098901014,0.7524478825  
 O,0,-5.5251573049,-1.8095475607,0.5363885128  
 O,0,3.6806946483,2.1225673279,-0.4780613471  
 O,0,0.9340948306,3.0228196815,-0.9367287965  
 H,0,2.4451889395,-2.1551954295,0.3236164233  
 H,0,3.4414067441,-1.1334005823,1.3733943657  
 H,0,3.6516340598,-0.3386518078,-0.9329546953  
 H,0,-3.611277645,1.4658073038,2.7285346582  
 H,0,2.6208513575,1.4553071132,1.1008788882  
 H,0,0.4880504044,1.4845651592,0.2965136715  
 H,0,1.4049423481,3.2031605672,-1.8769074205  
 H,0,3.7373813662,1.9331890826,-1.4979374878  
 H,0,-5.3981670404,0.1027443506,2.038713579  
 H,0,0.6080045866,-0.8979550375,1.0898411559  
 H,0,-0.6397438363,-2.5412498948,-1.3002427334  
 O,0,1.3940878707,0.9852655735,-4.5376615004  
 As,0,2.5515424183,2.0024163437,-3.8941887522  
 O,0,3.6613118658,2.5351405576,-5.2377856068  
 O,0,1.9543218202,3.4278698169,-3.1938440615  
 O,0,3.7034640683,1.2635926955,-2.8675905264  
 H,0,0.2022699953,0.6202052396,-2.3208578937  
 H,0,4.5079771453,2.3060375245,-4.8179620497

### LG 3.1 Nuc 1.9

lg31.1  
 E(RB+HF-LYP) = -3518.69630863

Zero-point correction= 0.261505  
 (Hartree/Particle)  
 Thermal correction to Energy= 0.283786  
 Thermal correction to Enthalpy= 0.284730  
 Thermal correction to Gibbs Free Energy= 0.206900  
 Sum of electronic and zero-point Energies= -  
 3518.434804

Sum of electronic and thermal Energies= -  
 3518.412523  
 Sum of electronic and thermal Enthalpies= -  
 3518.411578  
 Sum of electronic and thermal Free Energies= -  
 3518.489408

|       | E (Thermal)<br>KCal/Mol | CV<br>Cal/Mol-Kelvin | S<br>Cal/Mol-Kelvin |
|-------|-------------------------|----------------------|---------------------|
| Total | 178.078                 | 82.958               | 163.807             |

C,0,1.2304429276,1.8424868839,-0.669297612  
 C,0,0.9234224872,0.7532903762,-1.6986966551  
 O,0,1.569853827,-0.3614517638,-1.3882248885  
 C,0,2.6917211888,-0.1067441477,-0.4732338021  
 C,0,2.6075313686,1.3788142271,-0.0463997917  
 C,0,2.5523518098,-1.1121662156,0.6655604685  
 O,0,1.4942365358,-0.8438482618,1.5522013725  
 N,0,-0.9928778239,-0.8335155344,0.1505831812  
 C,0,-1.3443514908,-1.8135166955,-0.7296550703  
 N,0,-2.6285047042,-2.1891074671,-0.7620433265  
 C,0,-3.1869020331,-1.3790305056,0.1938124585  
 C,0,-2.1752420708,-0.5504214543,0.7527125103  
 N,0,-2.362905788,0.3888613851,1.7447110911  
 C,0,-3.5881122151,0.4751194416,2.1522568599  
 N,0,-4.6299807456,-0.2858076141,1.6698424978  
 C,0,-4.541846244,-1.2874506207,0.6532053911  
 O,0,-5.5701655532,-1.8953394811,0.3359262797  
 O,0,3.7439641876,2.133532706,-0.3720009922  
 O,0,1.0803871188,3.1742404499,-1.0288942313  
 H,0,2.4765304342,-2.1242910097,0.2247807421  
 H,0,3.4818081083,-1.0836524307,1.253177568  
 H,0,3.6035391736,-0.2805718828,-1.0520833028  
 H,0,-3.8558832075,1.1887404156,2.932004672  
 H,0,2.505285569,1.4346544682,1.0416785488  
 H,0,0.4727321488,1.6373386671,0.1033135263  
 H,0,1.704163299,3.415894451,-1.7752740612  
 H,0,4.0239440137,1.9174698779,-3.3105542921  
 H,0,-5.5640444323,-0.157682658,2.0386219559  
 H,0,0.6414357733,-0.8234112008,1.038527281  
 H,0,-0.5967951574,-2.2571487733,-1.3800655867  
 O,0,1.4485690482,1.2443838581,-3.4574026213  
 As,0,2.9267224736,2.15054491,-3.5804369532  
 O,0,3.276250491,2.0274500607,-5.3456038182  
 O,0,2.6784230658,3.7485808961,-3.1771151651  
 O,0,4.2369511172,1.3538067707,-2.8857226984  
 H,0,-0.0886660956,0.5850953928,-2.0410888004  
 H,0,4.0182558645,1.3995200988,-5.3394565754

### LG 3.1 Nuc 2.1

lg31.2  
 E(RB+HF-LYP) = -3518.68296100

Zero-point correction= 0.260641  
 (Hartree/Particle)  
 Thermal correction to Energy= 0.283028  
 Thermal correction to Enthalpy= 0.283972  
 Thermal correction to Gibbs Free Energy= 0.205418  
 Sum of electronic and zero-point Energies= -  
 3518.422320  
 Sum of electronic and thermal Energies= -  
 3518.399933  
 Sum of electronic and thermal Enthalpies= -  
 3518.398989  
 Sum of electronic and thermal Free Energies= -  
 3518.477543

|  | E (Thermal)<br>KCal/Mol | CV<br>Cal/Mol-Kelvin | S<br>Cal/Mol-Kelvin |
|--|-------------------------|----------------------|---------------------|
|--|-------------------------|----------------------|---------------------|

Total 177.603 83.119 165.331

C,0,1.2248801326,1.8626642715,-0.6944439379  
 C,0,0.8897003628,0.7497044648,-1.6781943587  
 O,0,1.5235984887,-0.3529212736,-1.3894372199  
 C,0,2.6654344751,-0.1048580189,-0.4796258298  
 C,0,2.5985037566,1.3848435789,-0.0653970453  
 C,0,2.5231847883,-1.1063001086,0.6610154387  
 O,0,1.4790550644,-0.8223081724,1.5584397672  
 N,0,-1.0149979939,-0.8439275687,0.1771914101  
 C,0,-1.3699310207,-1.8232696095,-0.7032370612  
 N,0,-2.6526258884,-2.2024831428,-0.7269963029  
 C,0,-3.2066112835,-1.3963849663,0.2346486441  
 C,0,-2.1943841493,-0.5661370597,0.7885677463  
 N,0,-2.3778797278,0.3703103859,1.7838802368  
 C,0,-3.6008251065,0.452244473,2.1993646545  
 N,0,-4.6435317364,-0.3104008967,1.7219855419  
 C,0,-4.5591298256,-1.3096971336,0.7029004485  
 O,0,-5.5870410766,-1.9199208766,0.3902912057  
 O,0,3.7416035722,2.1190635772,-0.39246913  
 O,0,1.0884603,3.1811582007,-1.0849546505  
 H,0,2.4321373959,-2.1188729293,0.224957165  
 H,0,3.460109058,-1.0851125712,1.2364115085  
 H,0,3.5585038916,-0.2908466652,-1.0820576306  
 H,0,-3.8655277003,1.1634717235,2.9822217478  
 H,0,2.4905497396,1.446139254,1.0220683483  
 H,0,0.4646948219,1.6785302318,0.0853513869  
 H,0,1.7226333088,3.4033141575,-1.8413198857  
 H,0,4.0125442761,1.9072016847,-1.3411743677  
 H,0,-5.5756409805,-0.1854094911,2.0967932571  
 H,0,0.6166408253,-0.8157574713,1.0596410713  
 H,0,-0.6268435074,-2.2631045289,-1.3614170237  
 O,0,1.4964071091,1.2180050075,-3.6333408998  
 As,0,2.955361433,2.130153342,-3.6329931658  
 O,0,3.4725373599,2.0935246763,-5.3656261434  
 O,0,2.691026775,3.716439355,-3.17453302  
 O,0,4.2379731202,1.3328104256,-2.8755152275  
 H,0,-0.0855386318,0.6195608974,-2.1234561642  
 H,0,4.2772130436,1.5532403972,-5.2898743543

### LG 3.1 Nuc 2.3

lg31.3

E(RB+HF-LYP) = -3518.67284699

Zero-point correction= 0.259869  
 (Hartree/Particle)  
 Thermal correction to Energy= 0.282332  
 Thermal correction to Enthalpy= 0.283276  
 Thermal correction to Gibbs Free Energy= 0.204760  
 Sum of electronic and zero-point Energies= -  
 3518.412978  
 Sum of electronic and thermal Energies= -  
 3518.390515  
 Sum of electronic and thermal Enthalpies= -  
 3518.389571  
 Sum of electronic and thermal Free Energies= -  
 3518.468087

|       | E (Thermal)<br>KCal/Mol | CV<br>Cal/Mol-Kelvin | S<br>Cal/Mol-Kelvin |
|-------|-------------------------|----------------------|---------------------|
| Total | 177.166                 | 83.320               | 165.252             |

C,0,1.1304684915,1.8391526314,-0.7751904673  
 C,0,0.8563683683,0.6990733556,-1.7355536588  
 O,0,1.5079985986,-0.37276665,-1.4398584202  
 C,0,2.6252715444,-0.088126361,-0.4944581681  
 C,0,2.4844755623,1.3948120421,-0.0723919463  
 C,0,2.5121522553,-1.1135866778,0.6259005198  
 O,0,1.4594103617,-0.8873518786,1.5289090203

N,0,-1.0309919763,-0.8846160912,0.1458794416  
 C,0,-1.4379423485,-1.8597552598,-0.7167756009  
 N,0,-2.7276211127,-2.2132677884,-0.6905622692  
 C,0,-3.228761816,-1.393780578,0.2889278191  
 C,0,-2.1810425936,-0.5816421971,0.8001125206  
 N,0,-2.3066255266,0.3615249185,1.7976799236  
 C,0,-3.5100681833,0.4672801418,2.261855747  
 N,0,-4.5845363615,-0.2777761656,1.8297267902  
 C,0,-4.5596441094,-1.2814263746,0.8116209421  
 O,0,-5.6096847294,-1.8737871297,0.5426801146  
 O,0,3.6167728396,2.1642786018,-0.3330438439  
 O,0,0.9858189672,3.1405806909,-1.2030036417  
 H,0,2.4617909821,-2.1207323891,0.1710218452  
 H,0,3.4476443641,-1.0665739561,1.2014682387  
 H,0,3.5263769368,-0.2240319839,-1.0981120802  
 H,0,-3.7297259894,1.1857562518,3.0518501831  
 H,0,2.3130210052,1.4386244384,1.0076998691  
 H,0,0.3345676675,1.6498274037,-0.0294520296  
 H,0,1.6561678628,3.3602185671,-1.9427017177  
 H,0,3.934919852,1.9701323521,-1.2760497825  
 H,0,-5.4979538613,-0.1355620042,2.2425175627  
 H,0,0.5983539215,-0.8824496755,1.0285870015  
 H,0,-0.7294677925,-2.3193570092,-1.3995986785  
 O,0,1.6298309374,1.1419233143,-3.8558445651  
 As,0,3.0218679611,2.1065979962,-3.6538375869  
 O,0,3.7898170495,2.1681860727,-5.2950872978  
 O,0,2.6548540911,3.6723284409,-3.1758263161  
 O,0,4.2492636015,1.359531355,-2.7539242995  
 H,0,-0.0436071633,0.5713930086,-2.3178050808  
 H,0,4.6427048121,1.7500362068,-5.087693928

### LG 3.1 Nuc 2.5

lg31.4

E(RB+HF-LYP) = -3518.66562041

Zero-point correction= 0.259065  
 (Hartree/Particle)  
 Thermal correction to Energy= 0.281559  
 Thermal correction to Enthalpy= 0.282503  
 Thermal correction to Gibbs Free Energy= 0.203853  
 Sum of electronic and zero-point Energies= -  
 3518.406555  
 Sum of electronic and thermal Energies= -  
 3518.384061  
 Sum of electronic and thermal Enthalpies= -  
 3518.383117  
 Sum of electronic and thermal Free Energies= -  
 3518.461767

|       | E (Thermal)<br>KCal/Mol | CV<br>Cal/Mol-Kelvin | S<br>Cal/Mol-Kelvin |
|-------|-------------------------|----------------------|---------------------|
| Total | 176.681                 | 83.427               | 165.534             |

C,0,1.1150088467,1.8342283082,-0.781221128  
 C,0,0.8452498542,0.6872021536,-1.7251191873  
 O,0,1.5138141972,-0.3700099382,-1.4596592406  
 C,0,2.6204078127,-0.0871179866,-0.4870274509  
 C,0,2.474063102,1.3974014151,-0.0738368349  
 C,0,2.4921564949,-1.1141981497,0.6294669691  
 O,0,1.4424576577,-0.8813037592,1.5330463522  
 N,0,-1.0366113213,-0.9076870207,0.1523583612  
 C,0,-1.457151373,-1.8810516865,-0.7062346934  
 N,0,-2.7490671617,-2.223766337,-0.6702709515  
 C,0,-3.2369547655,-1.3982242731,0.3109343269  
 C,0,-2.1799994155,-0.5937346164,0.8136101725  
 N,0,-2.2905892171,0.3523722374,1.8098533909  
 C,0,-3.4899431294,0.4686724081,2.2822267687  
 N,0,-4.5730906206,-0.268695991,1.8591428327  
 C,0,-4.5634283451,-1.2743727456,0.8427040574

O,0,-5.6193062673,-1.8595641364,0.5825334508  
 O,0,3.6002309718,2.1660518892,-0.3444389685  
 O,0,0.9653056977,3.1239762033,-1.2296811911  
 H,0,2.4351310645,-2.1198621532,0.1724563832  
 H,0,3.4286691403,-1.0755377606,1.2039861423  
 H,0,3.5224864445,-0.2251569942,-1.0882336586  
 H,0,-3.698200257,1.1904634795,3.0721757851  
 H,0,2.3011143401,1.4454806169,1.0058977829  
 H,0,0.3203800891,1.6445822502,-0.031534348  
 H,0,1.6405357603,3.3357161476,-1.985472492  
 H,0,3.9014599368,1.9731860302,-1.2990553749  
 H,0,-5.4824028816,-0.1183035256,2.2780864603  
 H,0,0.5791979328,-0.8908733041,1.035677712  
 H,0,-0.7576419792,-2.347916803,-1.3934872292  
 O,0,1.6677617873,1.1199054546,-4.0459462247  
 As,0,3.0152672226,2.0877181628,-3.7055659469  
 O,0,3.9308579233,2.2553247193,-5.2648904981  
 O,0,2.6046680219,3.6322432779,-3.1776022294  
 O,0,4.1936077139,1.3327607776,-2.740289749  
 H,0,0.0073572185,0.5838011245,-2.398621947  
 H,0,4.7794419735,1.8709581453,-4.9863014441

### LG 3.1 Nuc 2.7

lg31.5

E(RB+HF-LYP) = -3518.66057999

Zero-point correction= 0.257924  
 (Hartree/Particle)  
 Thermal correction to Energy= 0.279598  
 Thermal correction to Enthalpy= 0.280543  
 Thermal correction to Gibbs Free Energy= 0.204999  
 Sum of electronic and zero-point Energies= -  
 3518.402656  
 Sum of electronic and thermal Energies= -  
 3518.380982  
 Sum of electronic and thermal Enthalpies= -  
 3518.380037  
 Sum of electronic and thermal Free Energies= -  
 3518.455581

|       | E (Thermal)<br>KCal/Mol | CV<br>Cal/Mol-Kelvin | S<br>Cal/Mol-Kelvin |
|-------|-------------------------|----------------------|---------------------|
| Total | 175.451                 | 81.565               | 158.996             |

C,0,1.2150828204,1.8534145303,-0.6687560219  
 C,0,0.8774317074,0.7314772915,-1.6124330485  
 O,0,1.5536129249,-0.3313446472,-1.4301578497  
 C,0,2.6706377303,-0.1091690035,-0.4494299203  
 C,0,2.6136554226,1.387672205,-0.0581844157  
 C,0,2.4651519047,-1.1086071957,0.6822995182  
 O,0,1.4261433942,-0.785963307,1.5694027347  
 N,0,-1.0281289318,-0.9268070069,0.184488196  
 C,0,-1.4193935377,-1.9200810157,-0.6654855032  
 N,0,-2.7096576692,-2.2688587825,-0.65755946  
 C,0,-3.229027144,-1.4249262946,0.2913024852  
 C,0,-2.1911515284,0.6043584361,0.8065815042  
 N,0,-2.3341638811,0.3624970862,1.7782970185  
 C,0,-3.5477747153,0.4845823895,2.2114842871  
 N,0,-4.6149957668,-0.2664207269,1.7727856626  
 C,0,-4.571304949,-1.2952234721,0.7805962623  
 O,0,-5.6162686709,-1.891270548,0.5028486431  
 O,0,3.7327345255,2.1082106451,-0.4425200047  
 O,0,1.0576975825,3.1457927034,-1.0951578479  
 H,0,2.3435898906,-2.1161690559,0.2438246308  
 H,0,3.3984623474,-1.1217954747,1.263480587  
 H,0,3.5614975433,-0.3178279866,-1.0452398644  
 H,0,-3.7821846724,1.2232316323,2.9780971899  
 H,0,2.5276801199,1.4635616945,1.0307875054  
 H,0,0.4703310927,1.6558289546,0.1304334251

H,0,1.6678405126,3.3364314974,-1.9281759131  
 H,0,3.9181750737,1.9016372254,-1.432348466  
 H,0,-5.5373169981,-0.109336381,2.1596310753  
 H,0,0.5586195638,-0.8311309506,1.0785782013  
 H,0,-0.6995830093,-2.3954162115,-1.3253445705  
 O,0,1.5204523142,1.1438847282,-4.2021124822  
 As,0,2.8672293487,2.0661634917,-3.7894692957  
 O,0,3.8277399839,2.3372580526,-5.3093453377  
 O,0,2.4915449168,3.5892727756,-3.1638136336  
 O,0,4.0315518716,1.2484122316,-2.8515487444  
 H,0,0.0706252309,0.68821154,-2.3313239953  
 H,0,4.6757081213,1.9618334417,-5.0168463924

### LG 3.1 Nuc 2.9

lg31.6

E(RB+HF-LYP) = -3518.65723045

Zero-point correction= 0.257094  
 (Hartree/Particle)  
 Thermal correction to Energy= 0.278880  
 Thermal correction to Enthalpy= 0.279825  
 Thermal correction to Gibbs Free Energy= 0.203745  
 Sum of electronic and zero-point Energies= -  
 3518.400137  
 Sum of electronic and thermal Energies= -  
 3518.378350  
 Sum of electronic and thermal Enthalpies= -  
 3518.377406  
 Sum of electronic and thermal Free Energies= -  
 3518.453486

|       | E (Thermal)<br>KCal/Mol | CV<br>Cal/Mol-Kelvin | S<br>Cal/Mol-Kelvin |
|-------|-------------------------|----------------------|---------------------|
| Total | 175.000                 | 81.634               | 160.124             |

C,0,1.2544587164,1.8284083664,-0.6017099364  
 C,0,0.926160487,0.7296234894,-1.5653402828  
 O,0,1.6094893681,-0.3303738441,-1.4188684483  
 C,0,2.706040952,-0.134790104,-0.4087850025  
 C,0,2.6760565304,1.3683100825,-0.0341475297  
 C,0,2.4555754744,-1.1204848799,0.7267316437  
 O,0,1.4152576792,-0.7616249174,1.5970421869  
 N,0,-1.0075864366,-0.9456337695,0.1851251136  
 C,0,-1.3985481022,-1.9495355688,-0.6526769354  
 N,0,-2.6917344777,-2.2860886316,-0.6528103005  
 C,0,-3.2137368312,-1.4211172657,0.2756054316  
 C,0,-2.1745039353,-0.6015205109,0.7884851512  
 N,0,-2.3182074719,0.3829532385,1.7418987936  
 C,0,-3.5354955385,0.5248900452,2.1585770976  
 N,0,-4.6048582388,-0.223253336,1.7206325003  
 C,0,-4.5601318742,-1.27024154,0.7475420472  
 O,0,-5.6073555042,-1.8614544976,0.4688319642  
 O,0,3.7737813163,2.0766213714,-0.4847597872  
 O,0,1.0748355462,3.1227050244,-1.0026107373  
 H,0,2.3115901929,-2.1274058246,0.2940303388  
 H,0,3.3813864274,-1.1558171672,1.3191418167  
 H,0,3.6027552111,-0.3741392658,-0.9836122771  
 H,0,-3.7711371578,1.2793753471,2.9091312739  
 H,0,2.6348088178,1.4616562631,1.056263678  
 H,0,0.5340165329,1.5986894509,0.211293855  
 H,0,1.6144791887,3.3046942292,-1.8975811306  
 H,0,3.8754275836,1.877464973,-1.4952929929  
 H,0,-5.5300715366,-0.0497571664,2.0933108428  
 H,0,0.5501259925,-0.8233132224,1.1019599822  
 H,0,-0.6766310948,-2.4421115805,-1.2974047853  
 O,0,1.446449929,1.1137880176,-4.3923012463  
 As,0,2.7334951217,2.0452637197,-3.858476994  
 O,0,3.784336087,2.4316797797,-5.2931721387  
 O,0,2.2973682968,3.5321896778,-3.1743825356

O,0,3.8740920378,1.223951496,-2.8883857887  
 H,0,0.189072422,0.7329942114,-2.3621946278  
 H,0,4.6311827586,2.1080719291,-4.94142408

### LG 3.1 Nuc 3.1

lg31.7nofreq

E(RB+HF-LYP) = -3518.71942448

C,0,1.675989533,1.7336121057,-0.4352498854  
 C,0,1.4689577841,0.7375102227,-1.5998772612  
 O,0,1.8969964185,-0.4999212507,-1.088430623  
 C,0,2.9131903595,-0.2948699931,-0.0786908834  
 C,0,3.0373821211,1.2326165862,0.1130712747  
 C,0,2.4992547249,-1.0782896253,1.1675381309  
 O,0,1.3871749028,-0.5456810666,1.8409943411  
 N,0,-0.8061936172,-0.5809360064,0.0418832921  
 C,0,-0.9957510511,-1.6248711861,-0.8155898548  
 N,0,-2.2334736834,-2.1229709948,-0.9274956113  
 C,0,-2.9395398613,-1.3339838733,-0.0556997627  
 C,0,-2.0548893364,-0.3918496418,0.5394344581  
 N,0,-2.4060945867,0.5546950421,1.4791404601  
 C,0,-3.661322358,0.5351627279,1.7931105222  
 N,0,-4.5876575304,-0.3378711972,1.2658201616  
 C,0,-4.3266012119,-1.3616090495,0.3022911153  
 O,0,-5.2662970543,-2.081474447,-0.0574889133  
 O,0,4.1481658362,1.7834978414,-0.5923238821  
 O,0,1.5953740499,3.1039905406,-0.7302298244  
 H,0,2.3335158431,-2.1295485147,0.8630861335  
 H,0,3.3422919175,-1.0767030318,1.8770395188  
 H,0,3.8707092998,-0.6918359599,-0.4514064149  
 H,0,-4.0540144955,1.2432450871,2.523913422

H,0,3.175466935,1.4961219888,1.1659119989  
 H,0,0.9050843642,1.5248993356,0.3095493356  
 H,0,2.1617360635,3.3412603086,-1.5038048341  
 H,0,3.8924110911,1.7484391997,-1.5357837537  
 H,0,-5.5545909942,-0.2916201274,1.561937536  
 H,0,0.6218813223,-0.5324765449,1.2002656681  
 H,0,-0.159076747,-2.0183895561,-1.3822225098  
 O,0,0.2459980964,2.1277181559,-4.0861764352  
 As,0,1.8558692424,2.3520829901,-3.8221825625  
 O,0,2.737961243,1.7555465157,-5.2746947124  
 O,0,2.6243272446,3.7296080635,-3.3050719156  
 O,0,2.3768545513,1.0600959492,-2.6728192524  
 H,0,0.4503125467,0.6537841735,-1.9727153751  
 H,0,2.0908415065,1.1456828523,-5.6673669417

### D. Grid Energies for Arsenolysis

| C-N | C-O | zpe        | free       | Relative zpe | Relative free |
|-----|-----|------------|------------|--------------|---------------|
| 1.7 | 1.9 | -3518.3539 |            | 50.75920301  |               |
| 1.7 | 2.1 | -3518.3730 |            | 38.77001606  |               |
| 1.7 | 2.3 | -3518.3861 |            | 30.57537603  |               |
| 1.7 | 2.5 | -3518.3952 |            | 24.87320174  |               |
| 1.7 | 2.7 | -3518.4013 |            | 21.03096414  |               |
| 1.7 | 2.9 | -3518.4036 |            | 19.57702578  |               |
| 1.7 | 3.1 | -3518.4041 |            | 19.2576237   |               |
| 1.9 | 1.9 | -3518.3660 | -3518.4201 | 43.14814635  | 43.49139377   |
| 1.9 | 2.1 | -3518.3660 | -3518.4284 | 43.14814635  | 38.2573412    |
| 1.9 | 2.3 | -3518.3753 | -3518.4353 | 37.31733272  | 33.97898484   |
| 1.9 | 2.5 | -3518.3819 | -3518.4399 | 33.16698819  | 31.04287023   |
| 1.9 | 2.7 | -3518.3862 | -3518.4430 | 30.4762296   | 29.0957098    |
| 1.9 | 2.9 | -3518.3886 | -3518.4441 | 28.97334555  | 28.4192551    |
| 1.9 | 3.1 | -3518.3908 | -3518.4450 | 27.60537593  | 27.84822191   |
| 2.1 | 1.9 | -3518.3911 | -3518.4336 | 27.4083381   | 35.04700516   |
| 2.1 | 2.1 | -3518.3829 | -3518.4336 | 32.56520706  | 35.01374718   |
| 2.1 | 2.3 | -3518.3829 | -3518.4375 | 32.55014685  | 32.54324425   |
| 2.1 | 2.5 | -3518.3832 | -3518.4360 | 32.39201458  | 33.51462818   |
| 2.1 | 2.7 | -3518.3842 | -3518.4398 | 31.72497251  | 31.12883896   |
| 2.1 | 2.9 | -3518.3860 | -3518.4414 | 30.63122433  | 30.09658666   |
| 2.1 | 3.1 | -3518.3882 | -3518.4425 | 29.26137218  | 29.44836986   |

|     |     |            |            |              |             |
|-----|-----|------------|------------|--------------|-------------|
| 2.3 | 1.9 | -3518.3890 | -3518.4562 | 28.75622743  | 20.83831887 |
| 2.3 | 2.1 | -3518.4018 | -3518.4494 | 20.73038732  | 25.13487299 |
| 2.3 | 2.3 | -3518.3961 | -3518.4463 | 24.28836335  | 27.06258064 |
| 2.3 | 2.5 | -3518.3927 | -3518.4446 | 26.3974211   | 28.08667533 |
| 2.3 | 2.7 | -3518.3911 | -3518.4445 | 27.41586821  | 28.20903959 |
| 2.3 | 2.9 | -3518.3909 | -3518.4447 | 27.5614503   | 28.07475266 |
| 2.3 | 3.1 | -3518.3906 | -3518.4456 | 27.7220926   | 27.5200347  |
| 2.5 | 1.9 | -3518.3899 | -3518.4692 | 28.17954666  | 12.69199703 |
| 2.5 | 2.1 | -3518.4161 | -3518.4602 | 11.74634097  | 18.29816244 |
| 2.5 | 2.3 | -3518.4070 | -3518.4544 | 17.43973013  | 21.99356294 |
| 2.5 | 2.5 | -3518.4007 | -3518.4503 | 21.37107401  | 24.51614912 |
| 2.5 | 2.7 | -3518.3967 | -3518.4486 | 23.88864012  | 25.59358207 |
| 2.5 | 2.9 | -3518.3947 | -3518.4478 | 25.16687595  | 26.08680415 |
| 2.5 | 3.1 | -3518.3934 | -3518.4477 | 25.97510755  | 26.16524277 |
| 2.7 | 1.9 | -3518.4255 | -3518.4785 | 5.862189078  | 6.832317992 |
| 2.7 | 2.1 | -3518.4145 | -3518.4679 | 12.72902007  | 13.50650372 |
| 2.7 | 2.3 | -3518.4065 | -3518.4603 | 17.74093445  | 18.25109927 |
| 2.7 | 2.5 | -3518.4012 | -3518.4551 | 21.09434254  | 21.52669625 |
| 2.7 | 2.7 | -3518.3981 | -3518.4524 | 23.0226777   | 23.20716535 |
| 2.7 | 2.9 | -3518.3962 | -3518.4511 | 24.24569274  | 24.03798726 |
| 2.7 | 3.1 | -3518.3945 | -3518.4501 | 25.31057552  | 24.67051633 |
| 2.9 | 1.9 | -3518.4312 | -3518.4849 | 2.237697094  | 2.835085662 |
| 2.9 | 2.1 | -3518.4193 | -3518.4733 | 9.735802135  | 10.09222725 |
| 2.9 | 2.3 | -3518.4104 | -3518.4647 | 15.29113931  | 15.50135483 |
| 2.9 | 2.5 | -3518.4043 | -3518.4587 | 19.11392414  | 19.27895901 |
| 2.9 | 2.7 | -3518.4007 | -3518.4555 | 21.38676174  | 21.25310232 |
| 2.9 | 2.9 | -3518.3985 | -3518.4540 | 22.75724139  | 22.20440597 |
| 2.9 | 3.1 | -3518.3966 | -3518.4532 | 23.95641109  | 22.7509663  |
| 3.1 | 1.9 | -3518.4348 | -3518.4894 | 0            | 0           |
| 3.1 | 2.1 | -3518.4223 | -3518.4775 | 7.833822356  | 7.445394285 |
| 3.1 | 2.3 | -3518.4130 | -3518.4681 | 13.69601143  | 13.37911939 |
| 3.1 | 2.5 | -3518.4066 | -3518.4618 | 17.72650174  | 17.34497627 |
| 3.1 | 2.7 | -3518.4027 | -3518.4556 | 20.17315933  | 21.22674694 |
| 3.1 | 2.9 | -3518.4001 | -3518.4535 | 21.7538545   | 22.5413783  |
| 3.1 | 3.1 | -3518.4558 | -3518.5118 | -13.19965182 | 14.02357113 |

### E. Grid Energies for Phosphorolysis

| C-N | C-O | zpe        | free         | Relative zpe | Relative free |
|-----|-----|------------|--------------|--------------|---------------|
| 1.7 | 1.9 | -1626.0267 | -1626.076352 | 51.47707331  |               |
| 1.7 | 2.1 | -1626.0466 | -1626.098805 | 38.98148659  |               |
| 1.7 | 2.3 | -1626.0600 | -1626.111699 | 30.60800649  |               |
| 1.7 | 2.5 | -1626.0686 | -1626.119759 | 25.21268411  |               |
| 1.7 | 2.7 |            |              |              |               |
| 1.7 | 2.9 |            |              |              |               |
| 1.7 | 3.1 |            |              |              |               |
| 1.9 | 1.9 | -1626.0393 | -1626.0890   | 43.576735    | 45.67073253   |
| 1.9 | 2.1 | -1626.0493 | -1626.1018   | 37.26650449  | 37.59971177   |
| 1.9 | 2.3 | -1626.0561 | -1626.1087   | 32.99505073  | 33.3069227    |
| 1.9 | 2.5 | -1626.0602 | -1626.1134   | 30.42414636  | 30.37520065   |
| 1.9 | 2.7 | -1626.0622 | -1626.1151   | 29.20552388  | 29.28521752   |



|     |     |            |            |             |             |
|-----|-----|------------|------------|-------------|-------------|
| 1.9 | 2.9 | -1626.0628 | -1626.1163 | 28.82839097 | 28.51965654 |
| 1.9 | 3.1 | -1626.0647 | -1626.1176 | 27.62043614 | 27.71707253 |
| 2.1 | 1.9 | -1626.0564 | -1626.1062 | 32.81809319 | 34.85059484 |
| 2.1 | 2.1 | -1626.0573 | -1626.1117 | 32.24454996 | 31.38047007 |
| 2.1 | 2.3 | -1626.0586 | -1626.1126 | 31.43694588 | 30.84771493 |
| 2.1 | 2.5 | -1626.0604 | -1626.1125 | 30.32562744 | 30.91799594 |
| 2.1 | 2.7 | -1626.0622 | -1626.1145 | 29.2212116  | 29.68431325 |
| 2.1 | 2.9 | -1626.0628 | -1626.1158 | 28.8516088  | 28.82211588 |
| 2.1 | 3.1 | -1626.0624 | -1626.1162 | 29.08566966 | 28.60939033 |
| 2.3 | 1.9 | -1626.0755 | -1626.1249 | 20.88098948 | 23.09735127 |
| 2.3 | 2.1 | -1626.0703 | -1626.1227 | 24.11830841 | 24.48979374 |
| 2.3 | 2.3 | -1626.0672 | -1626.1196 | 26.07048891 | 26.47585973 |
| 2.3 | 2.5 | -1626.0657 | -1626.1180 | 27.00233978 | 27.47297153 |
| 2.3 | 2.7 | -1626.0652 | -1626.1180 | 27.3248794  | 27.45916633 |
| 2.3 | 2.9 | -1626.0646 | -1626.1181 | 27.71770004 | 27.40269052 |
| 2.3 | 3.1 | -1626.0637 | -1626.1158 | 28.27743807 | 28.82650844 |
| 2.5 | 1.9 | -1626.0899 | -1626.1425 | 11.82917216 | 12.08394081 |
| 2.5 | 2.1 | -1626.0812 | -1626.1336 | 17.27281273 | 17.65684824 |
| 2.5 | 2.3 | -1626.0752 | -1626.1276 | 21.05167193 | 21.41939221 |
| 2.5 | 2.5 | -1626.0714 | -1626.1240 | 23.43934368 | 23.71670266 |
| 2.5 | 2.7 | -1626.0691 | -1626.1223 | 24.85123893 | 24.75962261 |
| 2.5 | 2.9 | -1626.0675 | -1626.1214 | 25.86341094 | 25.32814577 |
| 2.5 | 3.1 | -1626.0662 | -1626.1211 | 26.704273   | 25.49882822 |
| 2.7 | 1.9 | -1626.0993 | -1626.1519 | 5.901722145 | 6.202926465 |
| 2.7 | 2.1 | -1626.0888 | -1626.1415 | 12.48366405 | 12.72023494 |
| 2.7 | 2.3 | -1626.0811 | -1626.1340 | 17.30858075 | 17.42906248 |
| 2.7 | 2.5 | -1626.0759 | -1626.1290 | 20.59484538 | 20.55029224 |
| 2.7 | 2.7 | -1626.0725 | -1626.1262 | 22.70578566 | 22.33618286 |
| 2.7 | 2.9 | -1626.0703 | -1626.1245 | 24.08693297 | 23.36153256 |
| 2.7 | 3.1 | -1626.0688 | -1626.1239 | 25.065847   | 23.73239038 |
| 2.9 | 1.9 | -1626.1051 | -1626.1578 | 2.277230161 | 2.500623365 |
| 2.9 | 2.1 | -1626.0935 | -1626.1466 | 9.527469147 | 9.542529363 |
| 2.9 | 2.3 | -1626.0851 | -1626.1386 | 14.85376554 | 14.5161657  |
| 2.9 | 2.5 | -1626.0791 | -1626.1329 | 18.62070207 | 18.10865472 |
| 2.9 | 2.7 | -1626.0752 | -1626.1294 | 21.03786673 | 20.29489608 |
| 2.9 | 2.9 | -1626.0727 | -1626.1273 | 22.62232696 | 21.62207761 |
|     |     |            |            |             | -           |
| 2.9 | 3.1 | -1626.1250 | -1626.1794 | -10.2352993 | 11.06674872 |
| 3.1 | 1.9 | -1626.1087 | -1626.1618 | 0           | 0           |
| 3.1 | 2.1 | -1626.0966 | -1626.1500 | 7.606036589 | 7.395193565 |
| 3.1 | 2.3 | -1626.0875 | -1626.1413 | 13.30695585 | 12.84824678 |
| 3.1 | 2.5 | -1626.0812 | -1626.1354 | 17.26026255 | 16.52544952 |
| 3.1 | 2.7 | -1626.0771 | -1626.1315 | 19.84434462 | 18.96520451 |
| 3.1 | 2.9 | -1626.0745 | -1626.1298 | 21.46959293 | 20.02632223 |
|     |     |            |            |             | -           |
| 3.1 | 3.1 | -1626.1315 | -1626.1858 | 14.29088997 | 15.07276618 |

## F. KIEs for Arsenolysis Grid

### Arsenolysis

| r(C-N) | r(C-O) | <sup>1</sup> -C<br>KIE | 9-N KIE |
|--------|--------|------------------------|---------|
|--------|--------|------------------------|---------|

|     |     |       |       |
|-----|-----|-------|-------|
| 1.9 | 1.9 | 1.146 | 1.019 |
| 1.9 | 2.1 | 1.146 | 1.019 |
| 1.9 | 2.3 | 1.119 | 1.020 |
| 1.9 | 2.5 | 1.103 | 1.021 |
| 1.9 | 2.7 | 1.091 | 1.021 |
| 1.9 | 2.9 | 1.078 | 1.024 |
| 1.9 | 3.1 | 1.078 | 1.023 |
| 2.1 | 1.9 | 1.124 | 1.023 |
| 2.1 | 2.1 | 1.125 | 1.023 |
| 2.1 | 2.3 | 1.107 | 1.025 |
| 2.1 | 2.5 | 1.083 | 1.028 |
| 2.1 | 2.7 | 1.065 | 1.029 |
| 2.1 | 2.9 | 1.064 | 1.028 |
| 2.1 | 3.1 | 1.065 | 1.027 |
| 2.3 | 1.9 | 1.099 | 1.023 |
| 2.3 | 2.1 | 1.096 | 1.024 |
| 2.3 | 2.3 | 1.087 | 1.026 |
| 2.3 | 2.5 | 1.072 | 1.027 |
| 2.3 | 2.7 | 1.056 | 1.029 |
| 2.3 | 2.9 | 1.049 | 1.030 |
| 2.3 | 3.1 | 1.050 | 1.030 |
| 2.5 | 1.9 | 1.078 | 1.024 |
| 2.5 | 2.1 | 1.075 | 1.024 |
| 2.5 | 2.3 | 1.068 | 1.025 |
| 2.5 | 2.5 | 1.058 | 1.026 |
| 2.5 | 2.7 | 1.045 | 1.027 |
| 2.5 | 2.9 | 1.038 | 1.028 |
| 2.5 | 3.1 | 1.036 | 1.028 |
| 2.7 | 1.9 | 1.068 | 1.024 |
| 2.7 | 2.1 | 1.068 | 1.024 |
| 2.7 | 2.3 | 1.056 | 1.025 |
| 2.7 | 2.5 | 1.047 | 1.025 |
| 2.7 | 2.7 | 1.037 | 1.026 |
| 2.7 | 2.9 | 1.029 | 1.026 |
| 2.7 | 3.1 | 1.026 | 1.026 |
| 2.9 | 1.9 | 1.066 | 1.024 |
| 2.9 | 2.1 | 1.060 | 1.025 |
| 2.9 | 2.3 | 1.052 | 1.025 |
| 2.9 | 2.5 | 1.042 | 1.025 |
| 2.9 | 2.7 | 1.032 | 1.025 |
| 2.9 | 2.9 | 1.024 | 1.025 |

|     |     |       |       |
|-----|-----|-------|-------|
| 2.9 | 3.1 | 1.020 | 1.025 |
| 3.1 | 1.9 | 1.065 | 1.024 |
| 3.1 | 2.1 | 1.060 | 1.025 |
| 3.1 | 2.3 | 1.051 | 1.025 |
| 3.1 | 2.5 | 1.040 | 1.025 |
| 3.1 | 2.7 | 1.029 | 1.025 |
| 3.1 | 2.9 | 1.021 | 1.025 |
| 3.1 | 3.1 | 1.005 | 1.025 |

### G. KIEs for Phosphorolysis Grid

#### Phosphorolysis

| r(C-N) | r(C-O) | 1 <sup>1</sup> -C<br>KIE | 9-N KIE |
|--------|--------|--------------------------|---------|
| 1.9    | 1.9    | 1.144                    | 1.019   |
| 1.9    | 2.1    | 1.134                    | 1.020   |
| 1.9    | 2.3    | 1.118                    | 1.020   |
| 1.9    | 2.5    | 1.103                    | 1.021   |
| 1.9    | 2.7    | 1.093                    | 1.021   |
| 1.9    | 2.9    | 1.087                    | 1.021   |
| 1.9    | 3.1    | 1.079                    | 1.023   |
| 2.1    | 1.9    | 1.124                    | 1.023   |
| 2.1    | 2.1    | 1.118                    | 1.024   |
| 2.1    | 2.3    | 1.106                    | 1.025   |
| 2.1    | 2.5    | 1.083                    | 1.027   |
| 2.1    | 2.7    | 1.070                    | 1.028   |
| 2.1    | 2.9    | 1.066                    | 1.028   |
| 2.1    | 3.1    | 1.066                    | 1.027   |
| 2.3    | 1.9    | 1.098                    | 1.023   |
| 2.3    | 2.1    | 1.095                    | 1.024   |
| 2.3    | 2.3    | 1.085                    | 1.025   |
| 2.3    | 2.5    | 1.071                    | 1.027   |
| 2.3    | 2.7    | 1.057                    | 1.029   |
| 2.3    | 2.9    | 1.051                    | 1.029   |
| 2.3    | 3.1    | 1.050                    | 1.029   |
| 2.5    | 1.9    | 1.077                    | 1.024   |
| 2.5    | 2.1    | 1.075                    | 1.024   |
| 2.5    | 2.3    | 1.067                    | 1.025   |
| 2.5    | 2.5    | 1.056                    | 1.026   |
| 2.5    | 2.7    | 1.045                    | 1.027   |
| 2.5    | 2.9    | 1.039                    | 1.027   |
| 2.5    | 3.1    | 1.037                    | 1.027   |

|     |     |       |       |
|-----|-----|-------|-------|
| 2.7 | 1.9 | 1.068 | 1.024 |
| 2.7 | 2.1 | 1.064 | 1.024 |
| 2.7 | 2.3 | 1.057 | 1.025 |
| 2.7 | 2.5 | 1.047 | 1.025 |
| 2.7 | 2.7 | 1.036 | 1.025 |
| 2.7 | 2.9 | 1.029 | 1.027 |
| 2.7 | 3.1 | 1.026 | 1.026 |
| 2.9 | 1.9 | 1.065 | 1.025 |
| 2.9 | 2.1 | 1.060 | 1.024 |
| 2.9 | 2.3 | 1.052 | 1.025 |
| 2.9 | 2.5 | 1.042 | 1.025 |
| 2.9 | 2.7 | 1.030 | 1.025 |
| 2.9 | 2.9 | 1.023 | 1.025 |
| 2.9 | 3.1 | 1.007 | 1.025 |
| 3.1 | 1.9 | 1.065 | 1.025 |
| 3.1 | 2.1 | 1.060 | 1.025 |
| 3.1 | 2.3 | 1.050 | 1.025 |
| 3.1 | 2.5 | 1.039 | 1.025 |
| 3.1 | 2.7 | 1.028 | 1.025 |
| 3.1 | 2.9 | 1.020 | 1.025 |
| 3.1 | 3.1 | 1.006 | 1.025 |

### 3. Transition Structures of Stationary Points

#### Phosphorolysis Transition Structure 1 B3LYP/6-31G\*

E(RB+HF-LYP) = -1626.32403896

Zero-point correction= 0.261525  
 (Hartree/Particle)  
 Thermal correction to Energy= 0.283529  
 Thermal correction to Enthalpy= 0.284473  
 Thermal correction to Gibbs Free Energy= 0.208147  
 Sum of electronic and zero-point Energies= 1626.062514  
 Sum of electronic and thermal Energies= 1626.040510  
 Sum of electronic and thermal Enthalpies= 1626.039566  
 Sum of electronic and thermal Free Energies= 1626.115892

|       | E (Thermal)<br>KCal/Mol | CV<br>Cal/Mol-Kelvin | S<br>Cal/Mol-Kelvin |
|-------|-------------------------|----------------------|---------------------|
| Total | 177.917                 | 82.050               | 160.642             |

C,0,5.0282989717,-0.5633981841,-0.3534705126  
 C,0,3.6787319256,-0.8008092482,-0.7779686034  
 C,0,2.5972433006,-0.1494330348,-0.128557377  
 N,0,2.6996290343,0.7367231237,0.9212474894  
 C,0,3.9187432277,0.9491165863,1.3045543061

N,0,5.0255611576,0.3624946525,0.7386263654  
 N,0,1.4442865042,-0.5452841101,-0.7222154358  
 C,0,1.8735966007,-1.4047528621,-1.6857296484  
 N,0,3.192475383,-1.6036520263,-1.7777230393  
 O,0,6.111198738,-0.9992854056,-0.7522682211  
 C,0,-0.7456214646,-0.1374883884,-0.4438030276  
 C,0,-0.9028877566,-0.0125259944,1.0679588297  
 C,0,-1.5205672651,1.4535597347,1.2250610176  
 C,0,-1.1655810373,2.1067309743,-0.1320806528  
 O,0,-0.8785411338,0.9927413386,-1.064711215  
 O,0,-1.5344468972,-1.0476085073,1.7169478523  
 C,0,0.0556141669,3.0148523695,-0.1243777405  
 O,0,0.4417681647,3.4175180182,-1.4387654657  
 O,0,-2.8586992241,1.5298432034,1.5545897677  
 O,0,-3.8245907259,-1.5584173275,0.6794104378  
 P,0,-3.9061276612,-0.8534615039,-0.7056983031  
 O,0,-3.9973356537,0.6912870634,-0.5650252249  
 O,0,-2.8587248211,-1.3235551449,-1.7195381862  
 O,0,-5.423907639,-1.3743142095,-1.2590735598  
 H,0,0.889846165,2.5212771249,0.3956678781  
 H,0,-0.1937936273,3.932698937,0.4221216573  
 H,0,-2.0369810969,2.5918590692,-0.5737098201  
 H,0,4.1196910187,1.6331000968,2.1283052148  
 H,0,-0.9558373921,1.9575172432,2.0254250289  
 H,0,0.1224939291,0.0528555468,1.4541267918  
 H,0,-2.4836231371,-1.219727136,1.3223241447  
 H,0,-3.4074979414,1.1437778047,0.7587018189  
 H,0,5.9486402909,0.5789744556,1.0937125802  
 H,0,0.5237668529,2.5876835024,-1.9381760683  
 H,0,1.1637167232,-1.8998591129,-2.3407552851

H,O,-0.9386668825,-1.0252604265,-1.035526518  
 H,O,-5.696683798,-1.9234152231,-0.5073882758

## Phosphorolysis Transition Structure 2 B3LYP/6-31G\*

E(RB3LYP) = -1626.32464403

|                                              |          |
|----------------------------------------------|----------|
| Zero-point correction=                       | 0.262118 |
| (Hartree/Particle)                           |          |
| Thermal correction to Energy=                | 0.283808 |
| Thermal correction to Enthalpy=              | 0.284753 |
| Thermal correction to Gibbs Free Energy=     | 0.209224 |
| Sum of electronic and zero-point Energies=   | -        |
| 1626.062526                                  |          |
| Sum of electronic and thermal Energies=      | -        |
| 1626.040836                                  |          |
| Sum of electronic and thermal Enthalpies=    | -        |
| 1626.039892                                  |          |
| Sum of electronic and thermal Free Energies= | -        |
| 1626.115420                                  |          |

|       | E (Thermal) | CV             | S              |
|-------|-------------|----------------|----------------|
|       | KCal/Mol    | Cal/Mol-Kelvin | Cal/Mol-Kelvin |
| Total | 178.092     | 81.279         | 158.964        |

C,O,-0.753379066,0.6313907841,0.964818412  
 C,O,-0.5212196415,-0.0858238162,-0.3710982076  
 O,O,-0.8888327165,0.6237093823,-1.4051866421  
 C,O,-1.3405940935,1.9688280498,-1.0120374032  
 C,O,-1.5943090012,1.9101777124,0.5163325798  
 C,O,-0.3003429622,2.9715982205,-1.4908808095  
 O,O,0.9309491638,2.9186685107,-0.7872348456  
 O,O,-2.9377510492,1.9106023164,0.8500830865  
 O,O,-1.2651266104,-0.1454500736,1.9796100694  
 N,O,1.5365667029,-0.0901132665,-0.6559215  
 C,O,2.6380165896,-0.2714600824,0.1287922432  
 C,O,3.6899323079,-0.7206864973,-0.7031014441  
 N,O,3.2442652945,-0.8322758645,-1.9985174195  
 C,O,1.9719875861,-0.4571029578,-1.9001471604  
 N,O,2.7166598676,-0.0277106961,1.4777112868  
 C,O,3.8858219282,-0.2688488336,1.977438895  
 N,O,4.967398969,-0.7154150562,1.2542592318  
 C,O,4.9910299293,-0.9783185197,-0.1498446747  
 O,O,6.042421653,-1.3613864313,-0.6658347979  
 O,O,-3.4143909355,-1.3775798704,1.3080690962  
 P,O,-3.5926106308,-1.3085464631,-0.2377064664  
 O,O,-5.0230661229,-2.2077327652,-0.4431498248  
 O,O,-3.918359003,0.1351600015,-0.7140342423  
 O,O,-2.4899521415,-2.0035055246,-1.0373521453  
 H,O,-0.1440016709,2.8349385393,-2.5761528906  
 H,O,-0.6996599592,3.983411994,-1.3419921778  
 H,O,-2.2878455013,2.097285632,-1.5407944275  
 H,O,4.0639102148,-0.1168725878,3.0412034612  
 H,O,-1.1348232962,2.7882252675,0.9906433386  
 H,O,0.2261017511,0.9995792702,1.2907138792  
 H,O,-2.162898834,-0.5975880021,1.7065871208  
 H,O,-3.4063241621,1.1602692874,0.3070984233  
 H,O,5.8515412261,-0.881894687,1.7189277833  
 H,O,1.2381719161,1.9902037884,-0.8038858851  
 H,O,1.2904993675,-0.4381828487,-2.742940771  
 H,O,-0.6180835288,-1.1598022068,-0.5114324717  
 H,O,-5.2027655406,-2.4393727056,0.4815442999

## Phosphorolysis Transition Structure B3LYP/6-31+G\*\* (shown in figure 3a)

E(RB3LYP) = -1626.48768640

|                                              |          |
|----------------------------------------------|----------|
| Zero-point correction=                       | 0.262571 |
| (Hartree/Particle)                           |          |
| Thermal correction to Energy=                | 0.284576 |
| Thermal correction to Enthalpy=              | 0.285521 |
| Thermal correction to Gibbs Free Energy=     | 0.208329 |
| Sum of electronic and zero-point Energies=   | -        |
| 1626.225115                                  |          |
| Sum of electronic and thermal Energies=      | -        |
| 1626.203110                                  |          |
| Sum of electronic and thermal Enthalpies=    | -        |
| 1626.202166                                  |          |
| Sum of electronic and thermal Free Energies= | -        |
| 1626.279357                                  |          |

|       | E (Thermal) | CV             | S              |
|-------|-------------|----------------|----------------|
|       | KCal/Mol    | Cal/Mol-Kelvin | Cal/Mol-Kelvin |
| Total | 178.574     | 81.985         | 162.462        |

C,O,-0.7682989781,-0.2821204319,0.6639079023  
 C,O,-0.088756702,-0.676561952,-0.6244477362  
 O,O,-0.5228741371,0.030563491,-1.653509701  
 C,O,-1.2415766286,1.2400916489,-1.1627585657  
 C,O,-1.0412486398,1.2320621805,0.3701786339  
 C,O,-0.7151016417,2.43251844,-1.9344528951  
 O,O,0.6623448233,2.7370577926,-1.7023464523  
 O,O,-2.0922590761,1.839136831,1.0620601229  
 O,O,-1.8491618711,-1.1223352245,0.6047580742  
 N,O,1.9338778549,-0.2347349494,-0.6089169839  
 C,O,2.8881190014,-0.1721481109,0.3594930145  
 C,O,4.1493905318,-0.3426239628,-0.2649250929  
 N,O,3.9757773042,-0.5216676818,-1.6148620201  
 C,O,2.6509166997,-0.4542616727,-1.751304171  
 N,O,2.6706938385,0.0304932712,1.699949349  
 C,O,3.7582420123,0.0586054387,2.4038745202  
 N,O,5.0254696984,-0.0962397144,1.8888512819  
 C,O,5.3521911492,-0.3102639183,0.5192100299  
 O,O,6.5410453847,-0.4347222082,0.2011048499  
 O,O,-4.0640360292,-1.2241979213,-1.0495564315  
 P,O,-4.9387006547,-0.2566823147,-0.0281455112  
 O,O,-4.5241401263,-0.8959236009,1.4420581399  
 O,O,-4.3328476878,1.1559490099,-0.1055957872  
 O,O,-6.4082023467,-0.4574052153,-0.2754889602  
 H,O,-0.8869758198,2.2697650421,-3.0102586951  
 H,O,-1.2925168236,3.3100814635,-1.6252335653  
 H,O,-2.3004486912,1.0813051842,-1.3937099683  
 H,O,3.7047294118,0.2136826521,3.4794643415  
 H,O,-0.1254055977,1.7839855715,0.6205447123  
 H,O,-0.1311195322,-0.3987515807,1.5560814209  
 H,O,-3.1486901019,-1.2598626557,-0.6755824953  
 H,O,-2.9803712057,1.5279444618,0.6869259514  
 H,O,5.825709503,-0.0585601742,2.5075209933  
 H,O,1.147216357,1.9040992631,-1.5938667448  
 H,O,2.1514533692,-0.5624574916,-2.7074057551  
 H,O,0.1437076106,-1.711340121,-0.8447047625  
 H,O,-3.539216259,-0.9361028397,1.4656749569

## Arsenolysis Transition Structure 1 B3LYP/6-31G\*

E(RB+HF-LYP) = -3518.64714426

Zero-point correction= 0.258494  
 (Hartree/Particle)  
 Thermal correction to Energy= 0.281165  
 Thermal correction to Enthalpy= 0.282109  
 Thermal correction to Gibbs Free Energy= 0.203949  
 Sum of electronic and zero-point Energies= -  
 3518.388651  
 Sum of electronic and thermal Energies= -  
 3518.365980  
 Sum of electronic and thermal Enthalpies= -  
 3518.365036  
 Sum of electronic and thermal Free Energies= -  
 3518.443195

|       | E (Thermal)<br>KCal/Mol | CV<br>Cal/Mol-Kelvin | S<br>Cal/Mol-Kelvin |
|-------|-------------------------|----------------------|---------------------|
| Total | 176.433                 | 84.039               | 164.500             |

O,0,-0.7191321723,0.9060348611,-1.0258398911  
 C,0,-0.558904575,-0.199925123,-0.3764345811  
 C,0,-0.7061847525,-0.0419328326,1.130891572  
 C,0,-1.3236686046,1.4301587511,1.2607930552  
 C,0,-0.995385316,2.0467055442,-0.1202449961  
 O,0,-1.3282717733,-1.0665433438,1.8050010222  
 O,0,-2.6554859413,1.5192980268,1.6164571268  
 C,0,0.2265679671,2.9533612144,-0.1553534676  
 O,0,0.5955702095,3.3205688652,-1.4842068178  
 O,0,-3.8084155091,0.8090822976,-0.5488851782  
 As,0,-3.7023460854,-0.8905424133,-0.6907738998  
 O,0,-3.6285639427,-1.6362333241,0.8244870886  
 O,0,-2.5674113186,-1.4497138658,-1.7914693896  
 O,0,-5.3618732911,-1.2237374341,-1.368849482  
 N,0,1.6925002327,-0.5482327065,-0.6704074364  
 C,0,2.8294487314,-0.1387000867,-0.0562300812  
 C,0,3.9336960973,-0.7611891159,-0.6962133965  
 N,0,3.4775931404,-1.561447113,-1.7121166605  
 C,0,2.1535375013,-1.3883819108,-1.6365342998  
 N,0,2.898812283,0.7381553995,1.0045123552  
 C,0,4.1075313222,0.9692797127,1.4093642464  
 N,0,5.234019414,0.4100691768,0.8544058469  
 C,0,5.2715597359,-0.5026515072,-0.2482953585  
 O,0,6.3691721114,-0.9124218752,-0.63493484  
 H,0,-0.0160311454,3.8856248824,0.3692853863  
 H,0,1.0669477193,2.474061268,0.3682187091  
 H,0,-1.876172029,2.5111158784,-0.5643909658  
 H,0,4.2827422691,1.6476090256,2.2436671466  
 H,0,-0.7422658015,1.9526230227,2.0364899196  
 H,0,0.3234109125,0.0345784245,1.5046616123  
 H,0,-2.2805287724,-1.259737313,1.4181177847  
 H,0,-3.2244588396,1.1784888883,0.8150103223  
 H,0,6.1471756779,0.6396863938,1.2264510412  
 H,0,0.6957743174,2.4772984019,-1.956890216  
 H,0,1.4635334721,-1.890069593,-2.3078316361  
 H,0,-0.7168366639,-1.1076128553,-0.9504657191  
 H,0,-5.7158765809,-0.3193236216,-1.3177829218

## Arsenolysis Transition Structure B3LYP/6-31G\*

E(RB3LYP) = -3518.64802828

Zero-point correction= 0.259322  
 (Hartree/Particle)  
 Thermal correction to Energy= 0.281599  
 Thermal correction to Enthalpy= 0.282543  
 Thermal correction to Gibbs Free Energy= 0.205838  
 Sum of electronic and zero-point Energies= -  
 3518.388707

Sum of electronic and thermal Energies= -  
 3518.366429  
 Sum of electronic and thermal Enthalpies= -  
 3518.365485  
 Sum of electronic and thermal Free Energies= -  
 3518.442190

|       | E (Thermal)<br>KCal/Mol | CV<br>Cal/Mol-Kelvin | S<br>Cal/Mol-Kelvin |
|-------|-------------------------|----------------------|---------------------|
| Total | 176.706                 | 83.225               | 161.440             |

C,0,-0.753758,0.584502,1.000961  
 C,0,-0.535597,-0.121937,-0.341402  
 O,0,-0.906544,0.590137,-1.366904  
 C,0,-1.343726,1.940874,-0.968618  
 C,0,-1.569521,1.887176,0.564182  
 C,0,-0.304658,2.933822,-1.467113  
 O,0,0.937901,2.875789,-0.784125  
 O,0,-2.907449,1.925318,0.923904  
 O,0,-1.280302,-0.197635,2.00449  
 N,0,1.547258,-0.130722,-0.644423  
 C,0,2.663053,-0.265537,0.128761  
 C,0,3.710154,-0.729571,-0.701483  
 N,0,3.247212,-0.89646,-1.984611  
 C,0,1.970594,-0.536174,-1.880584  
 N,0,2.75768,0.03058,1.466549  
 C,0,3.938269,-0.171443,1.956814  
 N,0,5.016139,-0.627808,1.234443  
 C,0,5.023436,-0.944182,-0.158986  
 O,0,6.073844,-1.329137,-0.675678  
 O,0,-3.444239,-1.393197,1.344848  
 As,0,-3.623005,-1.270579,-0.342905  
 O,0,-5.201351,-2.17745,-0.524672  
 O,0,-3.929704,0.333716,-0.814649  
 O,0,-2.456764,-2.065695,-1.243036  
 H,0,-0.168003,2.793551,-2.554424  
 H,0,-0.695847,3.948155,-1.314197  
 H,0,-2.299862,2.06337,-1.481768  
 H,0,4.12983,0.024562,3.011018  
 H,0,-1.076772,2.750697,1.03058  
 H,0,0.232772,0.929163,1.331246  
 H,0,-2.18972,-0.635069,1.727566  
 H,0,-3.412534,1.239517,0.336221  
 H,0,5.910447,-0.759644,1.690663  
 H,0,1.241862,1.946242,-0.806987  
 H,0,1.277268,-0.558648,-2.713777  
 H,0,-0.62361,-1.195488,-0.495061  
 H,0,-5.365815,-2.352416,0.417744

## Arsenolysis Transition Structure B3LYP/6-31+G\*\* (as shown in figure 3b)

E(RB3LYP) = -3518.84228642

Zero-point correction= 0.258548  
 (Hartree/Particle)  
 Thermal correction to Energy= 0.281303  
 Thermal correction to Enthalpy= 0.282247  
 Thermal correction to Gibbs Free Energy= 0.203476  
 Sum of electronic and zero-point Energies= -  
 3518.583738  
 Sum of electronic and thermal Energies= -  
 3518.560983  
 Sum of electronic and thermal Enthalpies= -  
 3518.560039  
 Sum of electronic and thermal Free Energies= -  
 3518.638810

|       | E (Thermal)<br>KCal/Mol | CV<br>Cal/Mol-Kelvin | S<br>Cal/Mol-Kelvin |
|-------|-------------------------|----------------------|---------------------|
| Total | 176.520                 | 83.942               | 165.788             |

C,0,-0.7070258485,0.3482160453,1.0268113268  
 C,0,-0.437282305,-0.2873148516,-0.3320688396  
 O,0,-0.841816566,0.4196292011,-1.3467179314  
 C,0,-1.3113424373,1.7639701037,-0.9263377287  
 C,0,-1.3832489553,1.7395711353,0.6233856534  
 C,0,-0.3924598324,2.7938827825,-1.5581853371  
 O,0,0.9335471384,2.8165596685,-1.032373708  
 O,0,-2.670238201,1.9489247027,1.1028238259  
 O,0,-1.4460574867,-0.4971784116,1.8442537959  
 N,0,1.6301185423,-0.205324805,-0.5940369758  
 C,0,2.7305832545,-0.2286151931,0.21147106  
 C,0,3.8236575066,-0.6853389311,-0.5642386931  
 N,0,3.4005625728,-0.9592185825,-1.8418273171  
 C,0,2.1024083527,-0.6658131477,-1.793264753  
 N,0,2.776072749,0.1516467502,1.5300060484  
 C,0,3.9547461932,0.0500746564,2.05957569  
 N,0,5.0739172203,-0.3870192807,1.3897037074  
 C,0,5.1295177823,-0.7906224927,0.0240172689  
 O,0,6.2138031104,-1.1536616308,-0.4465452413  
 O,0,-2.7597876928,-1.6405112471,0.0399469359  
 As,0,-4.1226358968,-0.9671039442,-0.7653803408  
 O,0,-5.4590242532,-1.6843427712,0.2884927428  
 O,0,-4.1871452653,0.7133890126,-0.5076911396  
 O,0,-4.3952105329,-1.4757234801,-2.3253382389  
 H,0,-0.3725906384,2.6377346374,-2.6483845677  
 H,0,-0.8171813462,3.7862514304,-1.3679506042  
 H,0,-2.322857274,1.830198119,-1.3394829389  
 H,0,4.1065492143,0.3208924727,3.1023146308  
 H,0,-0.745873559,2.53743045,1.0232986181  
 H,0,0.2467266759,0.5548915029,1.5187516598  
 H,0,-2.1350042455,-0.960554185,1.2241984233  
 H,0,-3.3364345318,1.3822570144,0.5448931143  
 H,0,5.9612167362,-0.4349188296,1.8744120594  
 H,0,1.2697499518,1.9039450894,-0.9986177617  
 H,0,1.4388803443,-0.7757140835,-2.6428750453  
 H,0,-0.416212495,-1.35769937,-0.485281668  
 H,0,-4.9436899821,-2.1044105368,0.992829269

## 4. Enzymatic Transition Structures

### Arsenolysis Transition Structure B3LYP/6-31G\* (as shown in figure 6a)

E(RB3LYP) = -4166.09200612

|                                            |          |
|--------------------------------------------|----------|
| Zero-point correction=                     | 0.467298 |
| (Hartree/Particle)                         |          |
| Thermal correction to Energy=              | 0.508248 |
| Thermal correction to Enthalpy=            | 0.509192 |
| Thermal correction to Gibbs Free Energy=   | 0.382135 |
| Sum of electronic and zero-point Energies= | -        |
| 4165.624708                                |          |

Sum of electronic and thermal Energies= -  
 4165.583758  
 Sum of electronic and thermal Enthalpies= -  
 4165.582814  
 Sum of electronic and thermal Free Energies= -  
 4165.709871

|       | E (Thermal)<br>KCal/Mol | CV<br>Cal/Mol-Kelvin | S<br>Cal/Mol-Kelvin |
|-------|-------------------------|----------------------|---------------------|
| Total | 318.930                 | 141.849              | 267.414             |

N,0,1.4850669813,-2.0904903984,0.087942836  
 C,0,1.2062714978,-0.9096051055,-0.5598493008  
 C,0,2.1736338609,-0.095804248,-1.2001179895  
 C,0,3.5583822388,-0.4576488761,-1.1751332187  
 N,0,3.7551056822,-1.6737384022,-0.5158770509  
 C,0,2.753211399,-2.4087163483,0.0658225329  
 N,0,1.5502225222,1.017056745,-1.7292936336  
 C,0,0.2700180656,0.8042929405,-1.3798152562  
 N,0,-0.0204490389,-0.3179802461,-0.6739664541  
 O,0,4.5388059551,0.1731666702,-1.6480693842  
 O,0,6.2210365248,-2.9685052171,-0.0996500309  
 C,0,6.1261102797,-4.0506470444,0.5518446232  
 C,0,7.4912396577,-4.7720949608,0.7823576612  
 O,0,5.1072300729,-4.6040446103,1.0232243484  
 O,0,4.5044037462,4.9467111525,-0.9991123559  
 C,0,4.7931795178,3.774162116,-1.2749311491  
 C,0,6.1646331659,3.1934620421,-0.9177094298  
 N,0,3.9917943414,2.9118012123,-1.9315587412  
 C,0,-2.9132479903,-0.2884176919,-0.4718773586  
 O,0,-2.9284048293,0.6059280463,0.4369827862  
 C,0,-3.5202503762,0.0798809636,1.7108418159  
 C,0,-3.7532548728,-1.4358321011,1.484384371  
 C,0,-3.15504329,-1.687830997,0.0287358349  
 O,0,-5.0650992811,-1.8275975744,1.7010755388  
 C,0,-2.5987382647,0.4179744216,2.8728726024  
 O,0,-2.5275731434,1.7884756659,3.1987275486  
 O,0,-3.7499313283,-2.612733942,-0.7917783166  
 O,0,-6.1087945918,-1.9329259149,-1.5665526475  
 As,0,-6.2130761917,-0.2785506351,-1.1844826395  
 O,0,-7.8064754976,0.1303737351,-2.0079942764  
 O,0,-6.4271080892,-0.0068747267,0.4801469861  
 O,0,-5.0064303089,0.6698109428,-1.8826876453  
 N,0,0.0000544586,2.7671818045,2.2203973399  
 C,0,0.5677312248,4.0454779437,1.9412265328  
 C,0,1.7751245506,3.959266356,1.3488695614  
 C,0,2.0646183808,2.5005564042,1.1717509746  
 C,0,0.855412872,1.88836438,1.8008744448  
 H,0,-0.0019099642,4.9311602073,2.2022749314  
 H,0,2.0918081844,2.2045207175,0.1060899276  
 H,0,7.3656314632,-5.7004363229,1.3515612119  
 H,0,7.9621718526,-4.9996051412,-0.1839008362  
 H,0,6.4442641878,3.5447369142,0.0807772611  
 H,0,6.1699590954,2.0998756425,-0.9458867798  
 H,0,3.0150820817,3.1461391054,-2.065511053  
 H,0,4.185063906,1.8931546259,-1.9305198418  
 H,0,2.4141954693,4.7573546471,0.9905008012  
 H,0,0.6570040403,0.822458226,1.8456357626  
 H,0,3.1162479295,-3.3202679048,0.5393114214  
 H,0,-0.5094975154,1.5163045384,-1.6413091148  
 H,0,-3.0196150261,-0.1115802097,3.7411686773  
 H,0,-1.6048343444,-0.0165426843,2.6815496266  
 H,0,-1.7322722064,2.1761800978,2.7665810886  
 H,0,-4.4757336658,0.6049214481,1.7714399357  
 H,0,-2.102464706,-2.0003611644,0.1751507474  
 H,0,-4.7154220268,-2.3377856398,-1.0627057936  
 H,0,-3.1308937991,-2.0080874194,2.1878810188  
 H,0,-5.686335993,-1.179935573,1.1944307005  
 H,0,8.1806401156,-4.1066127905,1.3199044486  
 H,0,6.9164083053,3.57268647,-1.6224203602

H,0,-2.6075807722,0.0094925208,-1.4632661216  
 H,0,-7.9819007636,-0.7456143934,-2.3930253722  
 H,0,4.7239570644,-2.064437527,-0.4229732053  
 H,0,3.0133311854,2.1528821134,1.6029494574

## Phosphorolysis Transition Structure B3LYP/6-31G\* (as shown in figure 6b)

E(RB+HF-LYP) = -2274.16515016

Zero-point correction= 0.470170  
 (Hartree/Particle)  
 Thermal correction to Energy= 0.509533  
 Thermal correction to Enthalpy= 0.510477  
 Thermal correction to Gibbs Free Energy= 0.388876  
 Sum of electronic and zero-point Energies= -  
 2273.694980  
 Sum of electronic and thermal Energies= -  
 2273.655617  
 Sum of electronic and thermal Enthalpies= -  
 2273.654673  
 Sum of electronic and thermal Free Energies= -  
 2273.776275

|       | E (Thermal) | CV             | S              |
|-------|-------------|----------------|----------------|
|       | KCal/Mol    | Cal/Mol-Kelvin | Cal/Mol-Kelvin |
| Total | 319.737     | 137.858        | 255.932        |

N,0,9.0044799834,4.592710143,-4.8596023783  
 C,0,7.653707748,4.351099501,-4.7643899358  
 C,0,6.6622662916,5.3579192016,-4.6618740406  
 C,0,7.0314822178,6.7405267865,-4.6180801134  
 N,0,8.414666284,6.9004420657,-4.7329977755  
 C,0,9.3072763414,5.8644870073,-4.8428702637  
 N,0,5.4205707569,4.7599263693,-4.5647109031  
 C,0,5.7401665617,3.4557320846,-4.6138374836  
 N,0,7.0515072208,3.1246344748,-4.727831334  
 O,0,6.2871278437,7.7459810108,-4.4891179291  
 O,0,9.8481698245,9.3317745921,-4.7040417525  
 C,0,11.1039158439,9.1939402876,-4.7912462502  
 C,0,11.8903033377,10.5426462594,-4.7872451497  
 O,0,11.7813601175,8.1454638742,-4.883026314  
 O,0,2.4904075246,7.2335107391,-1.5237246738  
 C,0,3.3508975471,7.6726543084,-2.3001584716  
 C,0,3.9788227365,9.0516064467,-2.0753131627  
 N,0,3.7891130727,7.048938015,-3.4090958036  
 C,0,6.8326324182,0.3021671801,-5.3569354606  
 O,0,6.5532040714,0.0138342275,-4.1474818344  
 C,0,7.6655306774,-0.7517833535,-3.4973217799  
 C,0,8.777744125,-0.8878430643,-4.5700715018  
 C,0,8.2621410221,0.0505031402,-5.746815006  
 O,0,9.0682037385,-2.2010466455,-4.9016666448  
 C,0,8.0828287445,-0.0265034659,-2.2246956853  
 O,0,7.1560268805,-0.1133074421,-1.1622242101  
 O,0,8.5496426485,-0.2895150989,-7.0459364237  
 O,0,7.3029236011,-2.4329908477,-7.7406010273  
 P,0,6.1877791103,-2.6749594205,-6.685726551  
 O,0,5.3230860451,-3.952903655,-7.3979374447  
 O,0,6.7400694728,-3.2167963297,-5.343521546  
 O,0,5.204209991,-1.5030512201,-6.531425792  
 N,0,5.8313142459,2.4296609982,-0.8106567258  
 C,0,4.545816327,2.9076190026,-0.4190646175  
 C,0,4.3901999452,4.2263848641,-0.6466750168  
 C,0,5.6567187974,4.7046114376,-1.2871391537  
 C,0,6.4712006168,3.4522375873,-1.2836676926  
 H,0,3.8348534245,2.1978943553,-0.009478515  
 H,0,5.4843524676,4.9959555767,-2.3412658207  
 H,0,12.973319967,10.3780659397,-4.8264048705  
 H,0,11.5865527441,11.1533012442,-5.6487436012

H,0,4.1719730485,9.1779994122,-1.0051011982  
 H,0,4.9064754644,9.1815065609,-2.6404131878  
 H,0,3.5608470825,6.0729295667,-3.5642849625  
 H,0,4.6608062786,7.3437210763,-3.8870075352  
 H,0,3.5137920034,4.8446705738,-0.4923656548  
 H,0,7.4707095323,3.3622740585,-1.6975103671  
 H,0,10.3414969091,6.2004688593,-4.9093993835  
 H,0,4.9743691814,2.6867879692,-4.5475951868  
 H,0,9.0105609354,-0.5159206863,-1.8926001324  
 H,0,8.3334110626,1.0151550633,-2.4771638427  
 H,0,6.5920839196,0.6926771325,-1.1585545531  
 H,0,7.2134124387,-1.7217220633,-3.2861474027  
 H,0,8.6864091089,1.0545484937,-5.5547262962  
 H,0,8.0713262747,-1.1703293297,-7.3132640763  
 H,0,9.7071379722,-0.4433861087,-4.1859806256  
 H,0,8.187630563,-2.672398024,-5.1545923863  
 H,0,11.6408208022,11.1207198168,-3.8871563581  
 H,0,3.2658456368,9.8307692798,-2.3753433484  
 H,0,6.0678689757,0.7890624236,-5.9434383745  
 H,0,5.7843505969,-4.0060210322,-8.2497212738  
 H,0,8.8276097167,7.8632337745,-4.7131329489  
 H,0,6.141897161,5.5626230059,-0.8029412485

## 5. Alternative Mechanisms

### A. $D_N^*A_N^\ddagger$ Structures Arsenolysis

#### B3LYP/6-31G\* $r_{C-O} = 2.7$

E(RB3LYP) = -3032.06636065

Zero-point correction= 0.167746  
 (Hartree/Particle)  
 Thermal correction to Energy= 0.182591  
 Thermal correction to Enthalpy= 0.183535  
 Thermal correction to Gibbs Free Energy= 0.125651  
 Sum of electronic and zero-point Energies= -  
 3031.898614  
 Sum of electronic and thermal Energies= -  
 3031.883770  
 Sum of electronic and thermal Enthalpies= -  
 3031.882826  
 Sum of electronic and thermal Free Energies= -  
 3031.940710

|       | E (Thermal) | CV             | S              |
|-------|-------------|----------------|----------------|
|       | KCal/Mol    | Cal/Mol-Kelvin | Cal/Mol-Kelvin |
| Total | 114.578     | 54.877         | 121.828        |

O,0,-0.9750173117,-0.4151954761,-0.5786602471  
 C,0,-1.9335225026,-1.3618412245,-0.1245828252  
 C,0,-2.7443081956,-1.9769553063,-1.2487200717  
 O,0,-1.7241767663,-2.6088502192,-2.170015614  
 C,0,-2.017895271,-3.8435084376,-2.3842281916  
 C,0,-3.0752759543,-4.4212843574,-1.4830696396  
 C,0,-3.7298441331,-3.0922272979,-0.8460055442  
 O,0,-5.038328298,-2.840958994,-1.2285887386  
 O,0,-3.8112290484,-5.4445232017,-1.7914406395  
 O,0,-5.0754400711,-5.0583217053,-4.0670218294  
 As,0,-4.220524371,-3.6461426913,-4.6784035463  
 O,0,-2.6187292568,-3.9605801121,-5.0139226765  
 O,0,-5.146916665,-3.5481638774,-6.2043607127  
 O,0,-4.5420963884,-2.3006224623,-3.7351256551  
 H,0,-2.6160643783,-0.8248104384,0.5425388045



H,0,-1.4549284683,-2.163696729,0.4644660143  
 H,0,-0.5110147612,-0.8365828016,-1.3200638572  
 H,0,-3.2234487086,-1.2276091648,-1.8795218434  
 H,0,-2.2332674316,-4.6649753291,-0.7082458478  
 H,0,-4.6515410765,-5.2829831726,-3.169260194  
 H,0,-3.736469594,-3.2125014678,0.2452286836  
 H,0,-5.0277223386,-2.7098921407,-2.2279491751  
 H,0,-1.3696108637,-4.3861956801,-3.0621008221  
 H,0,-5.7976851462,-4.2636407127,-6.1083958311

Zero-point correction= 0.168748  
 (Hartree/Particle)  
 Thermal correction to Energy= 0.183273  
 Thermal correction to Enthalpy= 0.184217  
 Thermal correction to Gibbs Free Energy= 0.127201  
 Sum of electronic and zero-point Energies= -  
 3031.907715  
 Sum of electronic and thermal Energies= -  
 3031.893190  
 Sum of electronic and thermal Enthalpies= -  
 3031.892246

Sum of electronic and thermal Free Energies= -  
 3031.949262

### B3LYP/6-31G\* $r_{C-O} = 2.5$

E(RB3LYP) = -3032.07052699

Zero-point correction= 0.168256  
 (Hartree/Particle)  
 Thermal correction to Energy= 0.182916  
 Thermal correction to Enthalpy= 0.183860  
 Thermal correction to Gibbs Free Energy= 0.126463  
 Sum of electronic and zero-point Energies= -  
 3031.902271  
 Sum of electronic and thermal Energies= -  
 3031.887611  
 Sum of electronic and thermal Enthalpies= -  
 3031.886667  
 Sum of electronic and thermal Free Energies= -  
 3031.944064

|       | E (Thermal)<br>KCal/Mol | CV<br>Cal/Mol-Kelvin | S<br>Cal/Mol-Kelvin |
|-------|-------------------------|----------------------|---------------------|
| Total | 114.782                 | 54.445               | 120.803             |

O,0,-1.0118847657,-0.3806387122,-0.6695465311  
 C,0,-1.9621883053,-1.3209246495,-0.1852686124  
 C,0,-2.7187817787,-2.0293507575,-1.2898718236  
 O,0,-1.6515478813,-2.690073384,-2.1364558486  
 C,0,-1.9719476763,-3.9138397018,-2.3878983178  
 C,0,-3.0588035261,-4.4843292603,-1.4995947115  
 C,0,-3.687385096,-3.1434642006,-0.8495457375  
 O,0,-5.0130753741,-2.8814923203,-1.1686124457  
 O,0,-3.8278897746,-5.4743866129,-1.8526783072  
 O,0,-5.142927412,-4.9841836978,-4.0394323122  
 As,0,-4.3094890881,-3.5407460422,-4.5841170204  
 O,0,-2.669485039,-3.8141518585,-4.7865446041  
 O,0,-5.0878941913,-3.4760836499,-6.1900571625  
 O,0,-4.7447520559,-2.1924543137,-3.6984836695  
 H,0,-2.6806805166,-0.7618390321,0.4235001835  
 H,0,-1.4832648776,-2.0709092424,0.4685797557  
 H,0,-0.5198458774,-0.8353155541,-1.372214286  
 H,0,-3.2004344681,-1.3386720018,-1.9841634032  
 H,0,-2.2624152714,-4.7797930578,-0.7093543176  
 H,0,-4.6798544203,-5.2509596061,-3.1613568364  
 H,0,-3.6504936477,-3.2622017526,0.2415527107  
 H,0,-5.0600722929,-2.6904403703,-2.1545086458  
 H,0,-1.2673881019,-4.4816498621,-2.9829073372  
 H,0,-5.6125555618,-4.2941633595,-6.2084707197

### B3LYP/6-31G\* $r_{C-O} = 2.3$

E(RB3LYP) = -3032.07646300

|       | E (Thermal)<br>KCal/Mol | CV<br>Cal/Mol-Kelvin | S<br>Cal/Mol-Kelvin |
|-------|-------------------------|----------------------|---------------------|
| Total | 115.005                 | 54.073               | 120.000             |

O,0,-1.0359562592,-0.3590130232,-0.7357966295  
 C,0,-1.9738561787,-1.299442205,-0.22575892  
 C,0,-2.7099824288,-2.0548896942,-1.3131472753  
 O,0,-1.6321777027,-2.717624209,-2.1296511115  
 C,0,-1.9756956803,-3.9318466199,-2.4302642502  
 C,0,-3.0591505697,-4.5122411613,-1.5202113785  
 C,0,-3.6615691942,-3.1725424099,-0.8460023644  
 O,0,-5.0019823148,-2.9023854217,-1.1079484826  
 O,0,-3.8603463462,-5.4739561958,-1.9017982514  
 O,0,-5.1966229323,-4.9528273932,-4.0247891391  
 As,0,-4.3498428464,-3.5057377756,-4.5103981187  
 O,0,-2.6900581266,-3.7799071977,-4.6112274529  
 O,0,-4.9809126513,-3.4366321266,-6.1764320465  
 O,0,-4.8285541786,-2.1532539468,-3.6624092718  
 H,0,-2.7047881334,-0.7342762904,0.3621154501  
 H,0,-1.4843472281,-2.0208681007,0.4519162158  
 H,0,-0.5418736228,-0.8268763032,-1.4284666255  
 H,0,-3.2079101728,-1.3902594151,-2.0221618404  
 H,0,-2.2893178416,-4.853800475,-0.7389527464  
 H,0,-4.7170431248,-5.2428634221,-3.1490659563  
 H,0,-3.5870888127,-3.296215348,0.2428211252  
 H,0,-5.0923062121,-2.6882217141,-2.0801030847  
 H,0,-1.2280854862,-4.5115839974,-2.9572940881  
 H,0,-5.4655889558,-4.2747985542,-6.2624237572

### B3LYP/6-31G\* $r_{C-O} = 2.1$

E(RB3LYP) = -3032.09202993

Zero-point correction= 0.171651  
 (Hartree/Particle)  
 Thermal correction to Energy= 0.185726  
 Thermal correction to Enthalpy= 0.186670  
 Thermal correction to Gibbs Free Energy= 0.131015  
 Sum of electronic and zero-point Energies= -  
 3031.920379  
 Sum of electronic and thermal Energies= -  
 3031.906304  
 Sum of electronic and thermal Enthalpies= -  
 3031.905360  
 Sum of electronic and thermal Free Energies= -  
 3031.961015

|       | E (Thermal)<br>KCal/Mol | CV<br>Cal/Mol-Kelvin | S<br>Cal/Mol-Kelvin |
|-------|-------------------------|----------------------|---------------------|
| Total | 116.545                 | 52.930               | 117.136             |

O,0,-1.080127763,-0.3598097003,-0.7945144609  
 C,0,-2.0088605743,-1.307107659,-0.2830967124  
 C,0,-2.7161105249,-2.0863386946,-1.3729417237  
 O,0,-1.6354834443,-2.750607429,-2.1521618044  
 C,0,-2.0083964194,-3.9587689866,-2.5154244272  
 C,0,-3.0272288422,-4.5221482217,-1.530104407  
 C,0,-3.6673900161,-3.2090731894,-0.8893403789  
 O,0,-5.0078198816,-2.9666760019,-1.1548175405  
 O,0,-3.8428124219,-5.5593805542,-1.9017564762  
 O,0,-5.2895183717,-4.8610752948,-3.9574297024  
 As,0,-4.4467230218,-3.4882633862,-4.4294028223  
 O,0,-2.7399563754,-3.7834750791,-4.4760600549  
 O,0,-4.8475213247,-3.2953568715,-6.1644193344  
 O,0,-4.8180994097,-2.0676233836,-3.6190173989  
 H,0,-2.7549273468,-0.747601435,0.2913707846  
 H,0,-1.513534968,-2.013145273,0.407632296  
 H,0,-0.5900845616,-0.8213099857,-1.49438371  
 H,0,-3.229107526,-1.4420892653,-2.0912748407  
 H,0,-2.3477475114,-4.9211431736,-0.7489288924  
 H,0,-4.4476675794,-5.2994293918,-2.6888070162  
 H,0,-3.5862116817,-3.3170536043,0.2020491998  
 H,0,-5.0944911629,-2.6472181886,-2.1110304911  
 H,0,-1.2244472321,-4.5597607122,-2.9595278475  
 H,0,-5.3507890391,-4.1076075187,-6.344062238

### B3LYP/6-31G\* $r_{C-O} = 1.9$

E(RB3LYP) = -3032.10945509

|                                              |          |
|----------------------------------------------|----------|
| Zero-point correction=                       | 0.172654 |
| (Hartree/Particle)                           |          |
| Thermal correction to Energy=                | 0.186663 |
| Thermal correction to Enthalpy=              | 0.187607 |
| Thermal correction to Gibbs Free Energy=     | 0.132093 |
| Sum of electronic and zero-point Energies=   | -        |
| 3031.936802                                  |          |
| Sum of electronic and thermal Energies=      | -        |
| 3031.922792                                  |          |
| Sum of electronic and thermal Enthalpies=    | -        |
| 3031.921848                                  |          |
| Sum of electronic and thermal Free Energies= | -        |
| 3031.977362                                  |          |

|       | E (Thermal) | CV             | S              |
|-------|-------------|----------------|----------------|
|       | KCal/Mol    | Cal/Mol-Kelvin | Cal/Mol-Kelvin |
| Total | 117.133     | 52.761         | 116.838        |

O,0,-1.0713713757,-0.3723969752,-0.8366157909  
 C,0,-2.004995503,-1.3045739564,-0.3055293506  
 C,0,-2.7188334578,-2.0927933657,-1.3869561801  
 O,0,-1.6505686946,-2.7439047245,-2.1712242587  
 C,0,-2.0519094995,-3.9505505218,-2.5843893206  
 C,0,-3.0264170214,-4.5228049795,-1.5500361119  
 C,0,-3.6535391492,-3.2212812375,-0.8843815483  
 O,0,-5.007338076,-2.9839275703,-1.1111590563  
 O,0,-3.8565463375,-5.5654604332,-1.8954062151  
 O,0,-5.3392071794,-4.8583265383,-3.9748553605  
 As,0,-4.4963401875,-3.4717625425,-4.3821634691  
 O,0,-2.7712095189,-3.7703103388,-4.3337094774  
 O,0,-4.7298924779,-3.2752581513,-6.1434223207  
 O,0,-4.9011296192,-2.0491459201,-3.6035482472  
 H,0,-2.7421759883,-0.7323305059,0.2680878439  
 H,0,-1.5089914735,-2.0070055677,0.3884171451  
 H,0,-0.6037784839,-0.849485649,-1.541874515  
 H,0,-3.2561945871,-1.4463810107,-2.0857353534  
 H,0,-2.325373262,-4.9250101219,-0.7944612583  
 H,0,-4.4799832467,-5.303319801,-2.6507552854

H,0,-3.5483672986,-3.335708026,0.2038355914  
 H,0,-5.1230962666,-2.6445867758,-2.0491897145  
 H,0,-1.2381853842,-4.5588310702,-2.9639084967  
 H,0,-5.1696129114,-4.1069072169,-6.3884692498

### B. $D_N^*A_N^{\ddagger}$ Structures Phosphorolysis

#### B3LYP/6-31G\* $r_{C-O} = 2.7$

E(RB3LYP) = -1139.73831950

|                                              |          |
|----------------------------------------------|----------|
| Zero-point correction=                       | 0.169737 |
| (Hartree/Particle)                           |          |
| Thermal correction to Energy=                | 0.183665 |
| Thermal correction to Enthalpy=              | 0.184609 |
| Thermal correction to Gibbs Free Energy=     | 0.128923 |
| Sum of electronic and zero-point Energies=   | -        |
| 1139.568583                                  |          |
| Sum of electronic and thermal Energies=      | -        |
| 1139.554655                                  |          |
| Sum of electronic and thermal Enthalpies=    | -        |
| 1139.553711                                  |          |
| Sum of electronic and thermal Free Energies= | -        |
| 1139.609396                                  |          |

|       | E (Thermal) | CV             | S              |
|-------|-------------|----------------|----------------|
|       | KCal/Mol    | Cal/Mol-Kelvin | Cal/Mol-Kelvin |
| Total | 115.251     | 52.029         | 117.200        |

O,0,4.190586392,-1.6557143711,-0.0934018627  
 C,0,3.7424338496,-0.3328531418,-0.3467721967  
 C,0,2.2328041751,-0.2170612075,-0.435046459  
 O,0,1.7186964156,-0.745769337,0.8922302765  
 C,0,0.9342861828,0.1096433727,1.4408952229  
 C,0,0.9327385798,1.4816542976,0.8184631173  
 C,0,1.6643385915,1.2049925224,-0.5930274441  
 O,0,0.8605680774,1.3587111001,-1.7121640528  
 O,0,-0.0631428118,2.3105296723,0.8975839147  
 O,0,-2.2939804664,1.2572408211,0.0440375508  
 As,0,-1.8346289113,-0.4416674317,-0.0546126819  
 O,0,-1.4783181401,-1.1024890402,1.4322096119  
 O,0,-3.4407507572,-1.0088803187,-0.6034745469  
 O,0,-0.710543666,-0.6763577261,-1.2731512474  
 H,0,4.1634239708,-0.0343345455,-1.3132166506  
 H,0,4.1222113944,0.3726651906,0.4131156117  
 H,0,3.6337793282,-1.9957941728,0.6260941069  
 H,0,1.7991882421,-0.9056105905,-1.1604606269  
 H,0,1.8338977446,1.7627323838,1.5068394115  
 H,0,-1.4544668698,1.7375082417,0.3693603622  
 H,0,2.483728959,1.9294156541,-0.68945849  
 H,0,0.1133145631,0.6868986493,-1.6292693714  
 H,0,0.4797769937,-0.1785708513,2.3820768814  
 H,0,-3.9366288756,-0.1763971753,-0.6808933259

#### B3LYP/6-31G\* $r_{C-O} = 2.5$

E(RB3LYP) = -1139.74531580

|                                 |          |
|---------------------------------|----------|
| Zero-point correction=          | 0.172166 |
| (Hartree/Particle)              |          |
| Thermal correction to Energy=   | 0.185800 |
| Thermal correction to Enthalpy= | 0.186744 |

Thermal correction to Gibbs Free Energy= 0.132031  
 Sum of electronic and zero-point Energies= -  
 1139.573150  
 Sum of electronic and thermal Energies= -  
 1139.559516  
 Sum of electronic and thermal Enthalpies= -  
 1139.558571  
 Sum of electronic and thermal Free Energies= -  
 1139.613285

|       | E (Thermal)<br>KCal/Mol | CV<br>Cal/Mol-Kelvin | S<br>Cal/Mol-Kelvin |
|-------|-------------------------|----------------------|---------------------|
| Total | 116.591                 | 51.479               | 115.155             |

O,0,-1.0193459277,-0.4123939519,-0.6655224717  
 C,0,-1.9685532183,-1.3624435036,-0.2026292178  
 C,0,-2.7478716687,-2.0229175395,-1.3227913499  
 O,0,-1.7133631348,-2.6704693539,-2.2022445244  
 C,0,-2.019452565,-3.8985018093,-2.4478930922  
 C,0,-3.0432314556,-4.4590277162,-1.4905525229  
 C,0,-3.7323438481,-3.1425194888,-0.9010413936  
 O,0,-5.0352143886,-2.9102477175,-1.2827383847  
 O,0,-3.8202523376,-5.5100510831,-1.8711044742  
 O,0,-5.0489434791,-4.8416784174,-3.9822281826  
 P,0,-4.3379709447,-3.5887218681,-4.5461535805  
 O,0,-2.8197325572,-3.8232276529,-4.8151459536  
 O,0,-5.0250749072,-3.388573519,-6.0538675932  
 O,0,-4.6039284063,-2.3058581792,-3.7331610297  
 H,0,-2.6741413965,-0.8219049933,0.4373299489  
 H,0,-1.4855268901,-2.13899106,0.4173424241  
 H,0,-0.5524244889,-0.8318929707,-1.4062091843  
 H,0,-3.2346273483,-1.3054427681,-1.9843851623  
 H,0,-2.364707158,-4.8157028798,-0.6804783925  
 H,0,-4.377216681,-5.2527802715,-2.7272698017  
 H,0,-3.7275793361,-3.2392077903,0.1947480698  
 H,0,-5.024044802,-2.7027873146,-2.2893765023  
 H,0,-1.3350623277,-4.4577616679,-3.0709949858  
 H,0,-5.5644477324,-4.1889594833,-6.1510826429

### B3LYP/6-31G\* $r_{C-O} = 2.3$

E(RB3LYP) = -1139.75570409

Zero-point correction= 0.173562  
 (Hartree/Particle)  
 Thermal correction to Energy= 0.187068  
 Thermal correction to Enthalpy= 0.188012  
 Thermal correction to Gibbs Free Energy= 0.133606  
 Sum of electronic and zero-point Energies= -  
 1139.582142  
 Sum of electronic and thermal Energies= -  
 1139.568636  
 Sum of electronic and thermal Enthalpies= -  
 1139.567692  
 Sum of electronic and thermal Free Energies= -  
 1139.622098

|       | E (Thermal)<br>KCal/Mol | CV<br>Cal/Mol-Kelvin | S<br>Cal/Mol-Kelvin |
|-------|-------------------------|----------------------|---------------------|
| Total | 117.387                 | 51.180               | 114.507             |

O,0,-1.0405935679,-0.3925110448,-0.7262514742  
 C,0,-1.9810788635,-1.3398964152,-0.2390947919  
 C,0,-2.7373287195,-2.0481036621,-1.345958561  
 O,0,-1.6883897205,-2.6977605215,-2.1921614429  
 C,0,-2.0247856711,-3.9183265763,-2.4904122409  
 C,0,-3.0394192927,-4.483358716,-1.5142437657  
 C,0,-3.7035580944,-3.1715870279,-0.8956835532  
 O,0,-5.0260181241,-2.9321180715,-1.2207328936  
 O,0,-3.8378440682,-5.5247151605,-1.8913775211

O,0,-5.1323070656,-4.8062845866,-3.9851145037  
 P,0,-4.3954420129,-3.5500871955,-4.4854604928  
 O,0,-2.8449784315,-3.7947939395,-4.6356450106  
 O,0,-4.9142155567,-3.3507756391,-6.0552708524  
 O,0,-4.7079994039,-2.2634244984,-3.7097419082  
 H,0,-2.6992970388,-0.7893441374,0.3778423839  
 H,0,-1.4910106392,-2.0897424007,0.4076800769  
 H,0,-0.5684831638,-0.8320780588,-1.4519462313  
 H,0,-3.2419261191,-1.3574238365,-2.0234958933  
 H,0,-2.3567018246,-4.8640858908,-0.7222834532  
 H,0,-4.4149218316,-5.2546812308,-2.7108591463  
 H,0,-3.6630154731,-3.2751107424,0.198432615  
 H,0,-5.0618109657,-2.6990211475,-2.2095455205  
 H,0,-1.2859815853,-4.4950038306,-3.0299165193  
 H,0,-5.4179497662,-4.1618286694,-6.2262092997

### B3LYP/6-31G\* $r_{C-O} = 2.1$

E(RB3LYP) = -1139.76940190

Zero-point correction= 0.174850  
 (Hartree/Particle)  
 Thermal correction to Energy= 0.188220  
 Thermal correction to Enthalpy= 0.189164  
 Thermal correction to Gibbs Free Energy= 0.135134  
 Sum of electronic and zero-point Energies= -  
 1139.594552  
 Sum of electronic and thermal Energies= -  
 1139.581182  
 Sum of electronic and thermal Enthalpies= -  
 1139.580238  
 Sum of electronic and thermal Free Energies= -  
 1139.634268

|       | E (Thermal)<br>KCal/Mol | CV<br>Cal/Mol-Kelvin | S<br>Cal/Mol-Kelvin |
|-------|-------------------------|----------------------|---------------------|
| Total | 118.110                 | 50.888               | 113.716             |

O,0,-1.0354958024,-0.4004809834,-0.7616987758  
 C,0,-1.9748789737,-1.3410044896,-0.2583921909  
 C,0,-2.7428440818,-2.0502529636,-1.3574631324  
 O,0,-1.7053854921,-2.6857121753,-2.2143066105  
 C,0,-2.0617231926,-3.9057758903,-2.5517853828  
 C,0,-3.0368244936,-4.4820743334,-1.5336399947  
 C,0,-3.6929493222,-3.1813193679,-0.8922389974  
 O,0,-5.0282603524,-2.947029153,-1.1826787161  
 O,0,-3.8463896588,-5.5313782965,-1.8871700491  
 O,0,-5.206816851,-4.7935250417,-3.998855961  
 P,0,-4.4444132445,-3.5390530417,-4.4396308995  
 O,0,-2.8734400855,-3.8046682839,-4.4859241811  
 O,0,-4.8100705594,-3.3301061085,-6.0471891929  
 O,0,-4.7776335985,-2.245020117,-3.695572823  
 H,0,-2.6820549881,-0.7855746896,0.3671624592  
 H,0,-1.4786604388,-2.0917627413,0.3827395391  
 H,0,-0.5845924661,-0.8473598516,-1.4967094238  
 H,0,-3.2697541585,-1.3559517543,-2.0142169466  
 H,0,-2.3356680123,-4.8658842046,-0.7643644078  
 H,0,-4.4362473182,-5.2688155521,-2.6782253156  
 H,0,-3.6300840109,-3.2923707687,0.1998532067  
 H,0,-5.0922390224,-2.6928554839,-2.1594039175  
 H,0,-1.2808828507,-4.4927025664,-3.0185772011  
 H,0,-5.2477480254,-4.1613851417,-6.2891610853

### B3LYP/6-31G\* $r_{C-O} = 1.9$

E(RB3LYP) = -1139.78649814

Zero-point correction= 0.175917  
 (Hartree/Particle)  
 Thermal correction to Energy= 0.189167  
 Thermal correction to Enthalpy= 0.190111  
 Thermal correction to Gibbs Free Energy= 0.136386  
 Sum of electronic and zero-point Energies= -  
 1139.610581  
 Sum of electronic and thermal Energies= -  
 1139.597331  
 Sum of electronic and thermal Enthalpies= -  
 1139.596387  
 Sum of electronic and thermal Free Energies= -  
 1139.650112

|       | E (Thermal)<br>KCal/Mol | CV<br>Cal/Mol-Kelvin | S<br>Cal/Mol-Kelvin |
|-------|-------------------------|----------------------|---------------------|
| Total | 118.704                 | 50.617               | 113.075             |

O,0,-1.02091916,-0.4212074731,-0.794209866  
 C,0,-1.9653931247,-1.3485212907,-0.274582291  
 C,0,-2.7537610982,-2.0480190069,-1.3681220064  
 O,0,-1.7385584323,-2.6628406621,-2.2462887743  
 C,0,-2.1136582766,-3.8888688874,-2.6229837919  
 C,0,-3.0424520748,-4.4730735881,-1.5560772875  
 C,0,-3.6887222029,-3.1861389328,-0.889455588  
 O,0,-5.0362779322,-2.9550067141,-1.1440358487  
 O,0,-3.8607827746,-5.5329560528,-1.8771438124  
 O,0,-5.239741325,-4.793567614,-4.0116136327  
 P,0,-4.4730322746,-3.5326968906,-4.4021688425  
 O,0,-2.8813220561,-3.8045858305,-4.3589529107  
 O,0,-4.6996237789,-3.3260891682,-6.0299132426  
 O,0,-4.8300904397,-2.2385287935,-3.6848294409  
 H,0,-2.6544190176,-0.7844559976,0.3636758464  
 H,0,-1.4673844001,-2.1068859918,0.3562667578  
 H,0,-0.6018220987,-0.8760748919,-1.5436227692  
 H,0,-3.3063930272,-1.3404082437,-1.9893582451  
 H,0,-2.3154548096,-4.8525500822,-0.8131945399

#### Phosphorolysis

| Distance | 2.7   | 2.5   | 2.3   | 2.1   | 1.9   |
|----------|-------|-------|-------|-------|-------|
| C        | 1.033 | 1.047 | 1.058 | 1.065 | 1.069 |
| 1'       | 1.541 | 1.349 | 1.248 | 1.149 | 1.054 |
| 2'       | 1.263 | 1.188 | 1.141 | 1.092 | 1.051 |
| 5'       | 1.057 | 1.060 | 1.061 | 1.065 | 1.072 |

#### Arsenolysis

| Distance | 2.7   | 2.5   | 2.3   | 2.1   | 1.9   |
|----------|-------|-------|-------|-------|-------|
| C        | 1.039 | 1.052 | 1.065 | 1.066 | 1.071 |
| 1'       | 1.422 | 1.337 | 1.258 | 1.158 | 1.071 |
| 2'       | 1.936 | 1.748 | 1.562 | 1.090 | 1.046 |
| 5'       | 1.050 | 1.058 | 1.057 | 1.064 | 1.068 |

#### D. $D_N^{\ddagger} * A_N$ Structures

#### B3LYP/6-31G\* $r_{C-N} = 2.3$

E(RB+HF-LYP) = -983.327394566

Zero-point correction= 0.237345  
 (Hartree/Particle)  
 Thermal correction to Energy= 0.253048  
 Thermal correction to Enthalpy= 0.253993  
 Thermal correction to Gibbs Free Energy= 0.193455

H,0,-4.4636866028,-5.2815089239,-2.6492255387  
 H,0,-3.6051306992,-3.3066400262,0.1998920205  
 H,0,-5.1249165214,-2.6905711355,-2.1083652259  
 H,0,-1.2926402762,-4.4797015666,-3.0131505596  
 H,0,-5.0988745966,-4.1611652359,-6.3199904108

#### C. $D_N^{\ddagger} * A_N^{\ddagger}$ Structure KIEs

\*(before tunneling)

Sum of electronic and zero-point Energies= -  
 983.090050  
 Sum of electronic and thermal Energies= -  
 983.074346  
 Sum of electronic and thermal Enthalpies= -  
 983.073402  
 Sum of electronic and thermal Free Energies= -  
 983.133939

|       | E (Thermal)<br>KCal/Mol | CV<br>Cal/Mol-Kelvin | S<br>Cal/Mol-Kelvin |
|-------|-------------------------|----------------------|---------------------|
| Total | 158.790                 | 60.885               | 127.411             |

N,0,0.1267647843,1.4261617053,0.2725665226  
 C,0,-0.8585385596,1.3398436793,-0.6832554225

C,0,-1.3217014613,0.160463128,-1.2929774767  
 C,0,-0.7441845448,-1.1126927718,-0.9441064666  
 N,0,0.2804483106,-0.9092827483,0.0503370754  
 C,0,0.6517977001,0.2780677988,0.5987264461  
 N,0,-2.3242628645,0.4548299336,-2.1816370713  
 C,0,-2.4314630077,1.7729403962,-2.0851594792  
 N,0,-1.5902074874,2.3695412736,-1.1874877427  
 O,0,-0.9749507594,-2.243646208,-1.3370215911  
 C,0,-1.2525106328,4.6379260593,-1.3618285047  
 O,0,0.0191275199,4.9065800427,-1.386909866  
 C,0,0.4491070119,5.5710475236,-0.1196987967  
 C,0,-0.8541640696,6.1800989703,0.4085119166  
 C,0,-1.9624483154,5.2308162621,-0.1544114281  
 O,0,-1.0766826001,7.5149937721,-0.0475625553  
 C,0,1.1178345065,4.582749849,0.8350426336  
 O,0,0.1794589675,3.8278730208,1.5462474251  
 O,0,-3.1313334136,5.9094207965,-0.5287008686  
 H,0,1.4325954332,0.2402997877,1.3535624514  
 H,0,-3.1483629536,2.3502806391,-2.6589337902  
 H,0,1.8157103586,3.9582365085,0.2593607877  
 H,0,1.7150582806,5.1861171853,1.535747499  
 H,0,0.1604522432,2.9108721772,1.1488170309  
 H,0,1.1650262607,6.3281820611,-0.4535583151  
 H,0,-1.7256168777,4.4776793277,-2.3219004797  
 H,0,-2.1864417314,4.4386543953,0.560861937  
 H,0,-2.8993140559,6.8589592909,-0.5164810165  
 H,0,-0.8787812096,6.2166374916,1.4966716287  
 H,0,-0.7275598556,7.6105441374,-0.9494703283  
 H,0,0.7340130229,-1.7637284849,0.3536678453

### B3LYP/6-31G\* $r_{C-N} = 2.5$

Zero-point correction= 0.236716  
 (Hartree/Particle)  
 Thermal correction to Energy= 0.252560  
 Thermal correction to Enthalpy= 0.253504  
 Thermal correction to Gibbs Free Energy= 0.192526  
 Sum of electronic and zero-point Energies= -  
 983.081492  
 Sum of electronic and thermal Energies= -  
 983.065647  
 Sum of electronic and thermal Enthalpies= -  
 983.064703  
 Sum of electronic and thermal Free Energies= -  
 983.125681

|       |   | E (Thermal) | CV             | S              |
|-------|---|-------------|----------------|----------------|
|       |   | KCal/Mol    | Cal/Mol-Kelvin | Cal/Mol-Kelvin |
| Total |   | 158.484     | 61.172         | 128.339        |
| 1     | 7 | 0           | -1.418418      | 1.203057       |
| 2     | 6 | 0           | -1.606587      | -0.152591      |
| 3     | 6 | 0           | -2.846628      | -0.806543      |
| 4     | 6 | 0           | -4.072764      | -0.052710      |
| 5     | 7 | 0           | -3.762254      | 1.348168       |
| 6     | 6 | 0           | -2.523371      | 1.894957       |
| 7     | 7 | 0           | -2.645881      | -2.157883      |
| 8     | 6 | 0           | -1.323086      | -2.266172      |
| 9     | 7 | 0           | -0.632291      | -1.098138      |
| 10    | 8 | 0           | -5.240739      | -0.393042      |
| 11    | 6 | 0           | 1.762671       | -0.981762      |
| 12    | 8 | 0           | 1.932387       | 0.018340       |
| 13    | 6 | 0           | 2.689624       | 1.118724       |
| 14    | 6 | 0           | 3.426221       | 0.379411       |
| 15    | 6 | 0           | 2.505073       | -0.850043      |
| 16    | 8 | 0           | 4.727863       | -0.067761      |
| 17    | 6 | 0           | 1.738479       | 2.214383       |
| 18    | 8 | 0           | 1.116967       | 1.861575       |

|    |   |   |           |           |           |
|----|---|---|-----------|-----------|-----------|
| 19 | 8 | 0 | 3.219995  | -2.018335 | -0.954558 |
| 20 | 1 | 0 | -2.479860 | 2.973254  | -0.382222 |
| 21 | 1 | 0 | -0.811385 | -3.221022 | 0.180032  |
| 22 | 1 | 0 | 1.020877  | 2.434617  | 1.089829  |
| 23 | 1 | 0 | 2.358289  | 3.113314  | 0.141766  |
| 24 | 1 | 0 | 0.155509  | 1.649899  | -0.715163 |
| 25 | 1 | 0 | 3.358826  | 1.495107  | 1.548893  |
| 26 | 1 | 0 | 1.414714  | -1.905960 | 1.100907  |
| 27 | 1 | 0 | 1.790504  | -0.613616 | -1.445213 |
| 28 | 1 | 0 | 4.149254  | -1.825511 | -0.720147 |
| 29 | 1 | 0 | 3.554805  | 1.003685  | -1.235614 |
| 30 | 1 | 0 | 4.729505  | -0.310539 | 0.965417  |
| 31 | 1 | 0 | -4.578713 | 1.948201  | -0.160364 |

### B3LYP/6-31G\* $r_{C-N} = 2.7$

E(RB+HF-LYP) = -983.310592173

Zero-point correction= 0.236096  
 (Hartree/Particle)  
 Thermal correction to Energy= 0.252091  
 Thermal correction to Enthalpy= 0.253035  
 Thermal correction to Gibbs Free Energy= 0.191500  
 Sum of electronic and zero-point Energies= -  
 983.074496  
 Sum of electronic and thermal Energies= -  
 983.058501  
 Sum of electronic and thermal Enthalpies= -  
 983.057557  
 Sum of electronic and thermal Free Energies= -  
 983.119092

|       | E (Thermal) | CV             | S              |
|-------|-------------|----------------|----------------|
|       | KCal/Mol    | Cal/Mol-Kelvin | Cal/Mol-Kelvin |
| Total | 158.190     | 61.433         | 129.512        |

N,0,0.0044976467,1.3857774841,0.2897444823  
 C,0,-0.9372838555,1.2250547125,-0.7044062138  
 C,0,-1.256144242,0.0142732038,-1.3497014807  
 C,0,-0.5751835293,-1.2023779813,-0.9958085732  
 N,0,0.3847562418,-0.920028023,0.0450965128  
 C,0,0.6240698279,0.2878878563,0.6225564219  
 N,0,-2.2456221592,0.2354389446,-2.2726600935  
 C,0,-2.4764207618,1.5398536686,-2.1482796897  
 N,0,-1.7368012851,2.1986108979,-1.2072449948  
 O,0,-0.67456443,-2.3459352523,-1.4116835526  
 C,0,-1.2153234534,4.8407080215,-1.4005937812  
 O,0,0.0505875031,5.0215147269,-1.3494900081  
 C,0,0.4491790172,5.6222586338,-0.0258661534  
 C,0,-0.853145762,6.2688691731,0.4580613425  
 C,0,-1.9705224448,5.4077885812,-0.2214737594  
 O,0,-0.9881469599,7.6347243912,0.0703722648  
 C,0,0.9941987407,4.5318765433,0.898560848  
 O,0,-0.0405520597,3.8011222724,1.4782547806  
 O,0,-3.0784329737,6.1572388316,-0.6397781842  
 H,0,1.3780596781,0.3105036702,1.4049790344  
 H,0,-3.2258421511,2.0557990188,-2.739822305  
 H,0,1.6931292393,3.9044844674,0.3268617815  
 H,0,1.5785470647,5.0561692413,1.6721289519  
 H,0,-0.0364941908,2.8724059186,1.0855299567  
 H,0,1.2249458247,6.3453413404,-0.2924171447  
 H,0,-1.6347955377,4.5048319597,-2.3401284043  
 H,0,-2.2732965435,4.5808525245,0.4249534299  
 H,0,-2.8030844586,7.0930597327,-0.5737708359  
 H,0,-0.9391531928,6.2409793276,1.5433477297  
 H,0,-0.5656088403,7.7752992842,-0.7931812928  
 H,0,0.9033180472,-1.7339161716,0.3548789302

**B3LYP/6-31G\*  $r_{C-N} = 2.9$** 

E(RB+HF-LYP) = -983.303383398

Zero-point correction= 0.235572  
 (Hartree/Particle)  
 Thermal correction to Energy= 0.251716  
 Thermal correction to Enthalpy= 0.252660  
 Thermal correction to Gibbs Free Energy= 0.190557  
 Sum of electronic and zero-point Energies= -  
 983.067811  
 Sum of electronic and thermal Energies= -  
 983.051668  
 Sum of electronic and thermal Enthalpies= -  
 983.050723  
 Sum of electronic and thermal Free Energies= -  
 983.112827

|       | E (Thermal)<br>KCal/Mol | CV<br>Cal/Mol-Kelvin | S<br>Cal/Mol-Kelvin |
|-------|-------------------------|----------------------|---------------------|
| Total | 157.954                 | 61.639               | 130.708             |

N,0,-0.1324214755,1.4075690185,0.3586930792  
 C,0,-1.1118636466,1.1964740014,-0.5906349397  
 C,0,-1.2776675822,0.0239880626,-1.3549816599  
 C,0,-0.3807229911,-1.0878693081,-1.1930110976  
 N,0,0.5960059481,-0.7606251615,-0.1802869422  
 C,0,0.6812043865,0.4014923276,0.5215793468  
 N,0,-2.3575995501,0.1773966192,-2.1869037016  
 C,0,-2.776151074,1.4080427013,-1.8950837358  
 N,0,-2.0882328671,2.0780802579,-0.9212159386  
 O,0,-0.3173432566,-2.1779373496,-1.7400228906  
 C,0,-1.1503143391,4.7827626181,-1.3848929456  
 O,0,0.1145652353,4.8418089727,-1.2455325563  
 C,0,0.4755629094,5.5219513513,0.0589382359  
 C,0,-0.7978776829,6.3049469371,0.3961154421  
 C,0,-1.9330381726,5.4948297236,-0.3129023216  
 O,0,-0.7838804933,7.6476125906,-0.0826792755  
 C,0,0.8561980146,4.4514001256,1.0834580879  
 O,0,-0.277423672,3.8080926677,1.5726730272  
 O,0,-2.9464793041,6.2962099215,-0.8551769219  
 H,0,1.4821373206,0.4670928129,1.2535264264  
 H,0,-3.6422286118,1.8519750763,-2.3755097664  
 H,0,1.5691310763,3.7584392048,0.614054341  
 H,0,1.3877736755,4.9789876969,1.8919484621  
 H,0,-0.2820555897,2.8685342687,1.2018896718  
 H,0,1.327023515,6.1557647143,-0.2027812506  
 H,0,-1.5416347585,4.3247993206,-2.2872118382  
 H,0,-2.3432472276,4.7281577152,0.3516013605  
 H,0,-2.5983453757,7.2094984407,-0.8373372574  
 H,0,-0.9643321805,6.3571602769,1.4713003402  
 H,0,-0.2909702779,7.6963058969,-0.918701871  
 H,0,1.2630980477,-1.5024745018,-0.0018909107

**B3LYP/6-31G\*  $r_{C-N} = 3.1$** 

E(RB+HF-LYP) = -983.297690255

Zero-point correction= 0.235039  
 (Hartree/Particle)  
 Thermal correction to Energy= 0.251257  
 Thermal correction to Enthalpy= 0.252201

Thermal correction to Gibbs Free Energy= 0.189744  
 Sum of electronic and zero-point Energies= -  
 983.062652  
 Sum of electronic and thermal Energies= -  
 983.046434  
 Sum of electronic and thermal Enthalpies= -  
 983.045489  
 Sum of electronic and thermal Free Energies= -  
 983.107946

|       | E (Thermal)<br>KCal/Mol | CV<br>Cal/Mol-Kelvin | S<br>Cal/Mol-Kelvin |
|-------|-------------------------|----------------------|---------------------|
| Total | 157.666                 | 61.693               | 131.451             |

N,0,-0.1570836571,1.3768682873,0.313089445  
 C,0,-1.1225943624,1.1253422398,-0.6423823684  
 C,0,-1.2722133978,-0.0799596489,-1.3580068319  
 C,0,-0.3746965912,-1.179567974,-1.1387297163  
 N,0,0.5884649227,-0.8063318416,-0.126421619  
 C,0,0.6580508954,0.3825267832,0.5293495125  
 N,0,-2.3554592917,0.0262011463,-2.1927067468  
 C,0,-2.7905508843,1.2615034866,-1.9455667276  
 N,0,-2.1119291759,1.9801141668,-1.002584154  
 O,0,-0.3002671182,-2.2921983236,-1.634812638  
 C,0,-1.1586417674,4.9039537625,-2.3929613996  
 O,0,0.1061754593,4.9707840555,-1.2767180719  
 C,0,0.4883573001,5.5866523999,0.0488474061  
 C,0,-0.7799483482,6.3536911226,0.4420982659  
 C,0,-1.9291397684,5.5783907455,-0.2870827097  
 O,0,-0.772156124,7.7180804579,0.0251855212  
 C,0,0.8667155711,4.4553626759,1.0110526285  
 O,0,-0.2736945823,3.7939939338,1.4568898568  
 O,0,-2.9384327057,6.4057674184,-0.7920939675  
 H,0,1.4454264041,0.4812289217,1.2724730424  
 H,0,-3.6620295101,1.675660849,-2.4432462662  
 H,0,1.5780216876,3.7871438364,0.5032445161  
 H,0,1.4023092929,4.9357917988,1.8458263239  
 H,0,-0.2739477391,2.8488022563,1.0779287752  
 H,0,1.3402289612,6.2292299679,-0.1891968108  
 H,0,-1.5604942324,4.4577516804,-2.2982289521  
 H,0,-2.3465814622,4.7926140707,0.3512489295  
 H,0,-2.5818312592,7.3154809183,-0.7539055379  
 H,0,-0.9307091203,6.355225031,1.520623097  
 H,0,-0.2744938903,7.8098631417,-0.8043716727  
 H,0,1.2520144938,-1.5395003662,0.0951788701

**E.  $D_N^{\ddagger} * A_N$  KIEs**

| r(C-N) distance | <b>2.3</b> | <b>2.5</b> | <b>2.7</b> | <b>2.9</b> | <b>3.1</b> |
|-----------------|------------|------------|------------|------------|------------|
| C               | 1.052      | 1.042      | 1.032      | 1.025      | 1.023      |
| N               | 1.029      | 1.031      | 1.032      | 1.036      | 1.037      |
| 1'              | 1.161      | 1.240      | 1.307      | 1.363      | 1.383      |
| 2'              | 0.969      | 0.983      | 1.002      | 1.024      | 1.024      |
| 5'              | 1.051      | 1.061      | 1.073      | 1.080      | 1.095      |

## 6. Synthetic Schemes for Specifically Labeled Inosine Substrates

Scheme S1: Synthesis of  $[5'\text{-}^3\text{H}_2]\text{-}$ ,  $[4'\text{-}^3\text{H}]\text{-}$ ,  $[5'\text{-}^{14}\text{C}]\text{-}$ , and  $[5'\text{-}^{14}\text{C}, 2'\text{-}^2\text{H}]\text{IMP}$  from labeled glucose, and of  $[1'\text{-}^3\text{H}]\text{-}$  and  $[1'\text{-}^{14}\text{C}]\text{IMP}$  from labeled ribose.

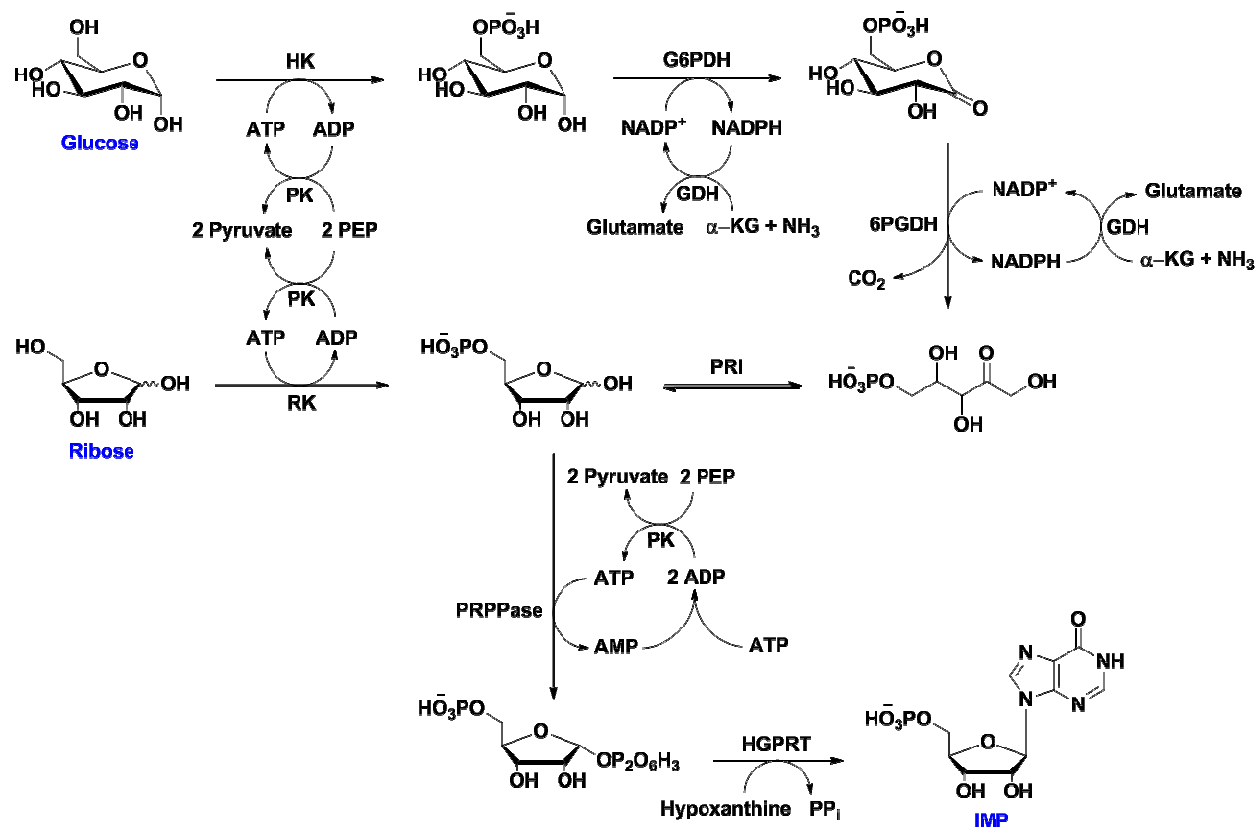



Scheme S2: Synthesis of [5'-<sup>14</sup>C,9-<sup>15</sup>N]inosine from labeled ATP.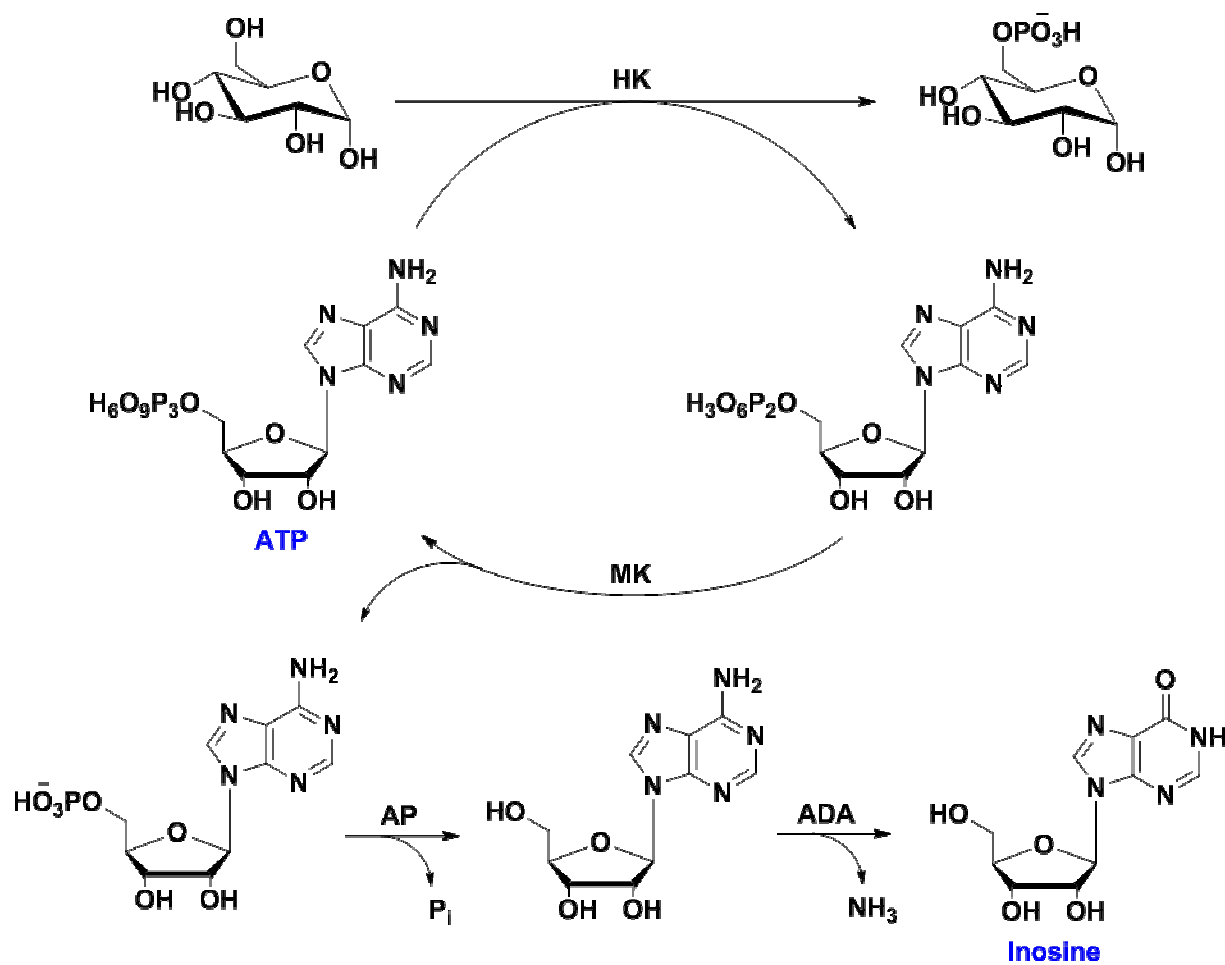

Supplement: NIHMS280298-supplement-1_si_001.pdf [file NIHMS280298-supplement-1_si_001.pdf]
